# Supplementary material for: Chromosome-level genome assembly reveals the unique genome evolution of the swimming crab (Portunus trituberculatus)
Source: PubMed Central journal article supplement (PMC6944217; doi:10.1093/gigascience/giz161), 2020-01-06

## Chromosome-level genome assembly reveals the unique genome evolution of swimming crab (*Portunus trituberculatus*)

--Manuscript Draft--

|                                                      |                                                                                                                                                                                                                                                                                                                                                                                                                                                                                                                                                                                                                                                                                                                                                                                                                                                                                                                                                                                                                                                                                                                                                                                                 |                  |
|------------------------------------------------------|-------------------------------------------------------------------------------------------------------------------------------------------------------------------------------------------------------------------------------------------------------------------------------------------------------------------------------------------------------------------------------------------------------------------------------------------------------------------------------------------------------------------------------------------------------------------------------------------------------------------------------------------------------------------------------------------------------------------------------------------------------------------------------------------------------------------------------------------------------------------------------------------------------------------------------------------------------------------------------------------------------------------------------------------------------------------------------------------------------------------------------------------------------------------------------------------------|------------------|
| <b>Manuscript Number:</b>                            | GIGA-D-19-00309R1                                                                                                                                                                                                                                                                                                                                                                                                                                                                                                                                                                                                                                                                                                                                                                                                                                                                                                                                                                                                                                                                                                                                                                               |                  |
| <b>Full Title:</b>                                   | Chromosome-level genome assembly reveals the unique genome evolution of swimming crab ( <i>Portunus trituberculatus</i> )                                                                                                                                                                                                                                                                                                                                                                                                                                                                                                                                                                                                                                                                                                                                                                                                                                                                                                                                                                                                                                                                       |                  |
| <b>Article Type:</b>                                 | Data Note                                                                                                                                                                                                                                                                                                                                                                                                                                                                                                                                                                                                                                                                                                                                                                                                                                                                                                                                                                                                                                                                                                                                                                                       |                  |
| <b>Funding Information:</b>                          | National Natural Science Foundation of China (31672267)                                                                                                                                                                                                                                                                                                                                                                                                                                                                                                                                                                                                                                                                                                                                                                                                                                                                                                                                                                                                                                                                                                                                         | Dr Boping Tang   |
|                                                      | National Natural Science Foundation of China (31640074)                                                                                                                                                                                                                                                                                                                                                                                                                                                                                                                                                                                                                                                                                                                                                                                                                                                                                                                                                                                                                                                                                                                                         | Mr Qiuning Liu   |
|                                                      | Jiangsu Agricultural Science and Technology Innovation Fund (CX(18)3027)                                                                                                                                                                                                                                                                                                                                                                                                                                                                                                                                                                                                                                                                                                                                                                                                                                                                                                                                                                                                                                                                                                                        | Dr Boping Tang   |
|                                                      | Jiangsu Agricultural Science and Technology Innovation Fund (CX(18)2027)                                                                                                                                                                                                                                                                                                                                                                                                                                                                                                                                                                                                                                                                                                                                                                                                                                                                                                                                                                                                                                                                                                                        | Dr Boping Tang   |
|                                                      | Natural Science Foundation of Jiangsu Province (BK20171276)                                                                                                                                                                                                                                                                                                                                                                                                                                                                                                                                                                                                                                                                                                                                                                                                                                                                                                                                                                                                                                                                                                                                     | Dr Daizhen Zhang |
|                                                      | Natural Science Foundation of Jiangsu Province (BK20160444)                                                                                                                                                                                                                                                                                                                                                                                                                                                                                                                                                                                                                                                                                                                                                                                                                                                                                                                                                                                                                                                                                                                                     | Mr Qiuning Liu   |
|                                                      | Qinglan Project of Jiangsu Province of China (CN) (2018M642105)                                                                                                                                                                                                                                                                                                                                                                                                                                                                                                                                                                                                                                                                                                                                                                                                                                                                                                                                                                                                                                                                                                                                 | Dr Daizhen Zhang |
| <b>Abstract:</b>                                     | <p>Background: The swimming crab, <i>Portunus trituberculatus</i>, is an important commercial species in China and is widely distributed in the coastal waters of Asia-Pacific countries. Despite increasing interest in swimming crab research, a high quality chromosome-level genome is still missing. Findings: Here, we assembled the first chromosome-level reference genome of <i>P. trituberculatus</i> by combining the short reads, Nanopore long reads, and Hi-C data. The genome assembly size was 1.00 Gb with a contig N50 length of 4.12 Mb. In addition, BUSCO assessment indicated that 94.7% of core eukaryotic genes were present in the genome assembly. Approximately 54.52% of the genome was identified as repetitive sequences, with a total of 16,796 annotated protein-coding genes. In addition, we anchored contigs into chromosomes and identified 50 chromosomes with a N50 length of 21.80 Mb by Hi-C technology. Conclusions: We anticipate that this chromosome-level assembly of the <i>P. trituberculatus</i> genome will not only promote study of basic development and evolution but also provide important resources for swimming crab reproduction.</p> |                  |
| <b>Corresponding Author:</b>                         | Yandong Ren<br>Northwestern Polytechnical University<br>Xi'an, Shaanxi CHINA                                                                                                                                                                                                                                                                                                                                                                                                                                                                                                                                                                                                                                                                                                                                                                                                                                                                                                                                                                                                                                                                                                                    |                  |
| <b>Corresponding Author Secondary Information:</b>   |                                                                                                                                                                                                                                                                                                                                                                                                                                                                                                                                                                                                                                                                                                                                                                                                                                                                                                                                                                                                                                                                                                                                                                                                 |                  |
| <b>Corresponding Author's Institution:</b>           | Northwestern Polytechnical University                                                                                                                                                                                                                                                                                                                                                                                                                                                                                                                                                                                                                                                                                                                                                                                                                                                                                                                                                                                                                                                                                                                                                           |                  |
| <b>Corresponding Author's Secondary Institution:</b> |                                                                                                                                                                                                                                                                                                                                                                                                                                                                                                                                                                                                                                                                                                                                                                                                                                                                                                                                                                                                                                                                                                                                                                                                 |                  |
| <b>First Author:</b>                                 | Yandong Ren                                                                                                                                                                                                                                                                                                                                                                                                                                                                                                                                                                                                                                                                                                                                                                                                                                                                                                                                                                                                                                                                                                                                                                                     |                  |
| <b>First Author Secondary Information:</b>           |                                                                                                                                                                                                                                                                                                                                                                                                                                                                                                                                                                                                                                                                                                                                                                                                                                                                                                                                                                                                                                                                                                                                                                                                 |                  |
| <b>Order of Authors:</b>                             | Yandong Ren                                                                                                                                                                                                                                                                                                                                                                                                                                                                                                                                                                                                                                                                                                                                                                                                                                                                                                                                                                                                                                                                                                                                                                                     |                  |
|                                                      | Boping Tang                                                                                                                                                                                                                                                                                                                                                                                                                                                                                                                                                                                                                                                                                                                                                                                                                                                                                                                                                                                                                                                                                                                                                                                     |                  |

|                                                |                                                                                                                                                                                                                                                                                                                                                                                                                                                                                                                                                                                                                                                                                                                                                                                                                                                                                                                                                                                                                                                                                                                                                                                                                                                                                                                                                                                                                                                                                                                                                                                                                                                                                                                                                                                                                                                                                                                                                                                                                                                                                                                                                                                                    |
|------------------------------------------------|----------------------------------------------------------------------------------------------------------------------------------------------------------------------------------------------------------------------------------------------------------------------------------------------------------------------------------------------------------------------------------------------------------------------------------------------------------------------------------------------------------------------------------------------------------------------------------------------------------------------------------------------------------------------------------------------------------------------------------------------------------------------------------------------------------------------------------------------------------------------------------------------------------------------------------------------------------------------------------------------------------------------------------------------------------------------------------------------------------------------------------------------------------------------------------------------------------------------------------------------------------------------------------------------------------------------------------------------------------------------------------------------------------------------------------------------------------------------------------------------------------------------------------------------------------------------------------------------------------------------------------------------------------------------------------------------------------------------------------------------------------------------------------------------------------------------------------------------------------------------------------------------------------------------------------------------------------------------------------------------------------------------------------------------------------------------------------------------------------------------------------------------------------------------------------------------------|
|                                                | Daizhen Zhang                                                                                                                                                                                                                                                                                                                                                                                                                                                                                                                                                                                                                                                                                                                                                                                                                                                                                                                                                                                                                                                                                                                                                                                                                                                                                                                                                                                                                                                                                                                                                                                                                                                                                                                                                                                                                                                                                                                                                                                                                                                                                                                                                                                      |
|                                                | Haorong Li                                                                                                                                                                                                                                                                                                                                                                                                                                                                                                                                                                                                                                                                                                                                                                                                                                                                                                                                                                                                                                                                                                                                                                                                                                                                                                                                                                                                                                                                                                                                                                                                                                                                                                                                                                                                                                                                                                                                                                                                                                                                                                                                                                                         |
|                                                | Senhao Jiang                                                                                                                                                                                                                                                                                                                                                                                                                                                                                                                                                                                                                                                                                                                                                                                                                                                                                                                                                                                                                                                                                                                                                                                                                                                                                                                                                                                                                                                                                                                                                                                                                                                                                                                                                                                                                                                                                                                                                                                                                                                                                                                                                                                       |
|                                                | Fujun Xuan                                                                                                                                                                                                                                                                                                                                                                                                                                                                                                                                                                                                                                                                                                                                                                                                                                                                                                                                                                                                                                                                                                                                                                                                                                                                                                                                                                                                                                                                                                                                                                                                                                                                                                                                                                                                                                                                                                                                                                                                                                                                                                                                                                                         |
|                                                | Baoming Ge                                                                                                                                                                                                                                                                                                                                                                                                                                                                                                                                                                                                                                                                                                                                                                                                                                                                                                                                                                                                                                                                                                                                                                                                                                                                                                                                                                                                                                                                                                                                                                                                                                                                                                                                                                                                                                                                                                                                                                                                                                                                                                                                                                                         |
|                                                | Zhengfei Wang                                                                                                                                                                                                                                                                                                                                                                                                                                                                                                                                                                                                                                                                                                                                                                                                                                                                                                                                                                                                                                                                                                                                                                                                                                                                                                                                                                                                                                                                                                                                                                                                                                                                                                                                                                                                                                                                                                                                                                                                                                                                                                                                                                                      |
|                                                | Yu Liu                                                                                                                                                                                                                                                                                                                                                                                                                                                                                                                                                                                                                                                                                                                                                                                                                                                                                                                                                                                                                                                                                                                                                                                                                                                                                                                                                                                                                                                                                                                                                                                                                                                                                                                                                                                                                                                                                                                                                                                                                                                                                                                                                                                             |
|                                                | Zhongli Sha                                                                                                                                                                                                                                                                                                                                                                                                                                                                                                                                                                                                                                                                                                                                                                                                                                                                                                                                                                                                                                                                                                                                                                                                                                                                                                                                                                                                                                                                                                                                                                                                                                                                                                                                                                                                                                                                                                                                                                                                                                                                                                                                                                                        |
|                                                | Yongxu Cheng                                                                                                                                                                                                                                                                                                                                                                                                                                                                                                                                                                                                                                                                                                                                                                                                                                                                                                                                                                                                                                                                                                                                                                                                                                                                                                                                                                                                                                                                                                                                                                                                                                                                                                                                                                                                                                                                                                                                                                                                                                                                                                                                                                                       |
|                                                | Wei Jiang                                                                                                                                                                                                                                                                                                                                                                                                                                                                                                                                                                                                                                                                                                                                                                                                                                                                                                                                                                                                                                                                                                                                                                                                                                                                                                                                                                                                                                                                                                                                                                                                                                                                                                                                                                                                                                                                                                                                                                                                                                                                                                                                                                                          |
|                                                | Hui Jiang                                                                                                                                                                                                                                                                                                                                                                                                                                                                                                                                                                                                                                                                                                                                                                                                                                                                                                                                                                                                                                                                                                                                                                                                                                                                                                                                                                                                                                                                                                                                                                                                                                                                                                                                                                                                                                                                                                                                                                                                                                                                                                                                                                                          |
|                                                | Zhongkai Wang                                                                                                                                                                                                                                                                                                                                                                                                                                                                                                                                                                                                                                                                                                                                                                                                                                                                                                                                                                                                                                                                                                                                                                                                                                                                                                                                                                                                                                                                                                                                                                                                                                                                                                                                                                                                                                                                                                                                                                                                                                                                                                                                                                                      |
|                                                | Kun Wang                                                                                                                                                                                                                                                                                                                                                                                                                                                                                                                                                                                                                                                                                                                                                                                                                                                                                                                                                                                                                                                                                                                                                                                                                                                                                                                                                                                                                                                                                                                                                                                                                                                                                                                                                                                                                                                                                                                                                                                                                                                                                                                                                                                           |
|                                                | Chaofeng Li                                                                                                                                                                                                                                                                                                                                                                                                                                                                                                                                                                                                                                                                                                                                                                                                                                                                                                                                                                                                                                                                                                                                                                                                                                                                                                                                                                                                                                                                                                                                                                                                                                                                                                                                                                                                                                                                                                                                                                                                                                                                                                                                                                                        |
|                                                | Yue Sun                                                                                                                                                                                                                                                                                                                                                                                                                                                                                                                                                                                                                                                                                                                                                                                                                                                                                                                                                                                                                                                                                                                                                                                                                                                                                                                                                                                                                                                                                                                                                                                                                                                                                                                                                                                                                                                                                                                                                                                                                                                                                                                                                                                            |
|                                                | Shusheng She                                                                                                                                                                                                                                                                                                                                                                                                                                                                                                                                                                                                                                                                                                                                                                                                                                                                                                                                                                                                                                                                                                                                                                                                                                                                                                                                                                                                                                                                                                                                                                                                                                                                                                                                                                                                                                                                                                                                                                                                                                                                                                                                                                                       |
|                                                | Qiang Qiu                                                                                                                                                                                                                                                                                                                                                                                                                                                                                                                                                                                                                                                                                                                                                                                                                                                                                                                                                                                                                                                                                                                                                                                                                                                                                                                                                                                                                                                                                                                                                                                                                                                                                                                                                                                                                                                                                                                                                                                                                                                                                                                                                                                          |
|                                                | Wen Wang                                                                                                                                                                                                                                                                                                                                                                                                                                                                                                                                                                                                                                                                                                                                                                                                                                                                                                                                                                                                                                                                                                                                                                                                                                                                                                                                                                                                                                                                                                                                                                                                                                                                                                                                                                                                                                                                                                                                                                                                                                                                                                                                                                                           |
|                                                | Xinzheng Li                                                                                                                                                                                                                                                                                                                                                                                                                                                                                                                                                                                                                                                                                                                                                                                                                                                                                                                                                                                                                                                                                                                                                                                                                                                                                                                                                                                                                                                                                                                                                                                                                                                                                                                                                                                                                                                                                                                                                                                                                                                                                                                                                                                        |
|                                                | Yongxin Li                                                                                                                                                                                                                                                                                                                                                                                                                                                                                                                                                                                                                                                                                                                                                                                                                                                                                                                                                                                                                                                                                                                                                                                                                                                                                                                                                                                                                                                                                                                                                                                                                                                                                                                                                                                                                                                                                                                                                                                                                                                                                                                                                                                         |
|                                                | Qiuning Liu                                                                                                                                                                                                                                                                                                                                                                                                                                                                                                                                                                                                                                                                                                                                                                                                                                                                                                                                                                                                                                                                                                                                                                                                                                                                                                                                                                                                                                                                                                                                                                                                                                                                                                                                                                                                                                                                                                                                                                                                                                                                                                                                                                                        |
| <b>Order of Authors Secondary Information:</b> |                                                                                                                                                                                                                                                                                                                                                                                                                                                                                                                                                                                                                                                                                                                                                                                                                                                                                                                                                                                                                                                                                                                                                                                                                                                                                                                                                                                                                                                                                                                                                                                                                                                                                                                                                                                                                                                                                                                                                                                                                                                                                                                                                                                                    |
| <b>Response to Reviewers:</b>                  | <p>Reviewer #1 Comments for the Author...</p> <p>1. The authors need to mention a previous publication describing the genome of <i>P. tuberculanus</i>: Lv J, Gao B, Liu P, Li J, Meng X. Linkage mapping aided by de novo genome and transcriptome assembly in <i>Portunus trituberculatus</i>: applications in growth-related QTL and gene identification. <i>Sci Rep.</i> 2017;7: 7874. doi:10.1038/s41598-017-08256-8). They need to compare their results with that of Lv et al., explain how they add to this previous knowledge, and discuss the discrepancies. The sentence at lines 70-71 should also be corrected, as it is not accurate that 'genomic research on the swimming crab has only been conducted at the transcriptome level, with the whole genome not yet described'.<br/> Response: We appreciate this reviewer for the comments and suggestions. We have cited the paper (Lv et al., 2017) and corrected the sentence at lines 70-71 in the revised manuscript. Moreover, we also compared the published paper of Lv et al and the genome we assembled, and the results indicated that our genome assembly is obviously better than the published paper (Lv et al., 2017). This results were added in the revised supplementary files (Table S5). Thank you.</p> <p>2. The manuscript identifies 50 chromosomes in <i>P. tuberculanus</i> genome, while linkage analysis of genomic markers lead Lv and colleagues to describe 53 linkage groups. The authors should discuss this discrepancy. In particular, it would be informative to map the 10000 markers used by Lv and colleagues to the proposed chromosomal assembly and compare to the genetic map.<br/> Response: We appreciate this reviewer for the comments and suggestions. Using the 10,963 markers in Lv et al., 2017 paper, all these markers were mapped to our genome using blastn with e-value of 10<sup>-5</sup>. Then, we found that 10,897 markers (99.40%) can be found in our genome, which proved that our genome have high-quality and completeness. What's more, the 50 assembled chromosomes have 10,769 markers, which accounts for almost 98.83% of all the mapped markers. The other</p> |

scaffolds only have ~1.17% markers, and only three scaffolds (scaffold 205, scaffold 452, and scaffold 523) have more than 10 markers (including 10). Moreover, the length of these three scaffolds is quite short, which indicates that these three scaffolds may be part of some chromosomes, not a complete chromosome. So we think that the swimming crab genome should have 50 chromosomes. This table was added in the revised supplementary files (Table S6). Thank you.

3. Genome size estimation is performed on the sole basis of the position of maximal density of 17-mers in BGISEq-500 short reads. However, the k-mer curve presented in Figure S1 has an unusually flat shape, with a secondary peak at ~90 depth, which casts some doubt on the accuracy of this measure. Moreover, the proposed estimation (1 Gb) differs substantially from that made by Lv and colleagues, who put forward a size of 0.8 Gb based on the analysis of 23-mer frequency. Given the importance of this result for estimating the degree of completion of the proposed assembly, the authors need to provide a more solid genome size estimation, either by choosing an alternative method (eg flow cytometry), providing k-mer counts for higher k, or otherwise explaining both the unusual shape of their k-mer curve and the discrepancy between their estimation and the one in Lv et al., 2017.

Response: We appreciate this reviewer for the comments and suggestions. We also used k-mer frequency with k set as 23 to check the genome size this time, and the estimated genome size is 959,508,443 bp, which is very close with the assembled genome size. Due to the high rate of heterozygosity, Figure S1 has two peaks and the shape looks a little flat. But the accuracy of this measure is reliable, and the peak of heterozygosity (80) is exactly 1/2 of the main peak (160), indicating the estimated results is reliable.

4. The submitted manuscript lacks all figure legends. Although this is probably due to a mistake during the submission process, this makes the signification of some figures very difficult to understand. In particular Figure 4a is of no use as long as what is described as 'unclustered genes', 'unique paralogues', 'multiple copy orthologs' or 'other orthologs' is not defined. A revised submission must of course include descriptive figure legends.

Response: Sorry for this mistake, we have added the figure legends in the revised manuscript. Thank you.

5. It would be of interest to report the rate of heterozygosity found in the sequenced individual.

Response: The rate of heterozygosity in the sequenced swimming crab individual was calculated using k-mer and the rate is ~0.9%.

6. I 168-170 : the method for gene annotation using BLAST similarity with KEGG, SwissProt and TrEMBL databases should be more detailed : which BLAST program ? which parameter values ? which subject species ? which score threshold required to call an annotation ? Etc.

Response: Thank you for your suggestions. We have added the information you mentioned in the revised manuscript. Thank you.

7. I 99-100 : the sentence 'For the short reads, any reads with more than 10% unknown reads or 100 low-quality bases more than 50% along with its paired-end read were removed' is very obscure. Please clarify.

Response: Sorry for this misleading. We have corrected this in the revised manuscript.

8. I 216 : please define precisely the seldom-used term 'mounting rate'.

Response: The mounting rate means the total length of the contigs that anchored to chromosomes divided by the total length of all assembled contigs. We also add the description of 'mounting rate' in the revised manuscript.

9. I 268-273 : picking 3 'interesting' terms out of the list of 34 KEGG terms that show enrichment in the unique gene families is very little informative and even misleading, especially when these 3 terms appear rather far (ranks 20, 29 and 30) in this list. This paragraph, and possibly the enrichment analysis itself should be discarded : the genome assembly and annotation are interesting enough in their own respect without having to add such poorly supported speculations.

Response: Sorry for this misleading. We have removed this analysis (enrichment

analysis) in the revised manuscript. Thank you.

10. I 292-300 : The conclusions on the relative evolution rates are not appropriate. First, the authors should not use the ill-defined term 'survival pressure'. Second, it is oversimplistic to interpret faster or slower evolution rates in terms of selection, since these rates are influenced by many other factors, including mutation rates, population size, etc.

Response: Thank you for your suggestions. We have revised the words in this part (including 'survival pressure') in the revised manuscript.

11. The authors should remove any reference to 'adaptive evolution' from the manuscript title, since nothing in their data points to evidence of adaptive evolution.

Response: We have removed the words of 'adaptive evolution' in manuscript title in the revised manuscript. Thank you.

12. I 294 and 191-194: Please explain the choice of LINTRE, a rather uncommon tool in the field, to assess evolution rates. Please also provide more precise reference (the cited 1995 paper does not directly refer to a program), program version, choice of parameters.

Response: Thank you for your suggestions. LINTRE is a pretty old software but it is very useful, which also used in some other papers, such as in the NATURE paper "The seahorse genome and the evolution of its specialized morphology" (Lin et al.) that published in 2016. We used the version 1 of LINTRE and all the parameters were used as default. We also make a change in our manuscript. Thank you.

13. L302-311: the last paragraph of the results is highly speculative, with no interpretation as to why the crab-enriched signalling pathways (HIF1, Hippo and insulin) might be particularly relevant to the evolution of this species. Although factually correct, this analysis could easily be removed from the manuscript to lend more weight to its important parts: the assembly and annotation of the genome.

Response: Thank you for your suggestions. We have removed this part in the revised manuscript.

14. L492: Reference 48 has no author names.

Response: Sorry for this mistake, we have corrected it in the revised manuscript.

15. Availability of the data: in the case of a revised submission, it would be more convenient for reviewers if they could have access to the genome data in the same form that will be eventually available from GigaDB. At present, nothing can be accessed there.

Response: We have uploaded all the related data, including the data of genome assembly and annotation to GigaDB. Thank you.

Reviewer #2 Comments for the Author...

1. This paper describes a high-quality genome assembly of *Portunus trituberculatus*, one of the most widely fished species of crab in the world. The paper is written clearly and succinctly. The figures look excellent are clear and informative. I downloaded the genome and found an expected Hox cluster, which is in line with this being a high quality data set. The authors do not describe the Hox cluster and this is fine, but they should consider since it would not have to be that extensive of an analysis and a description plus Hox complex figure would increase the interest in the paper (it could also be a follow-up study). Nevertheless, this is a wonderful genomic resource, an excellent analysis, and if the authors address the reproducibility issues in my next paragraph, I would say that this is a model genome data note.

Response: Thank you for your suggestions. Yes, hox cluster annotation and hox gene evolution analysis are the next points in our follow-up study, and several crab species may be included. Thank you.

2. The methods appear thorough, however repeating these analyses in full would be impossible without guessing at some parameter settings etc. In order to make the work repeatable, please include ALL command lines in a supplemental document. There is an excellent example in the supplement linked here:

<https://academic.oup.com/mbe/article/35/2/486/4644721#113627427>

|                                                                                                                                                                                                                                   |                                                                                                                                                                                                                                                                                                                                                                                                                                                                                                                                                                                                                                                                                                                                                                                                                                                                                                                                                                                                                                                                                                                                                                                                                                                                                                                                                                                                                                                                                                                                                                                                                                                                                                                                                                                                                                                                                                                                                                                                                                                                                                                                                                                                                                                                                                                                                                                                                                                                                                                                                                                                                                                                                                                                                                                                                                                                                                                                                                                                                                 |
|-----------------------------------------------------------------------------------------------------------------------------------------------------------------------------------------------------------------------------------|---------------------------------------------------------------------------------------------------------------------------------------------------------------------------------------------------------------------------------------------------------------------------------------------------------------------------------------------------------------------------------------------------------------------------------------------------------------------------------------------------------------------------------------------------------------------------------------------------------------------------------------------------------------------------------------------------------------------------------------------------------------------------------------------------------------------------------------------------------------------------------------------------------------------------------------------------------------------------------------------------------------------------------------------------------------------------------------------------------------------------------------------------------------------------------------------------------------------------------------------------------------------------------------------------------------------------------------------------------------------------------------------------------------------------------------------------------------------------------------------------------------------------------------------------------------------------------------------------------------------------------------------------------------------------------------------------------------------------------------------------------------------------------------------------------------------------------------------------------------------------------------------------------------------------------------------------------------------------------------------------------------------------------------------------------------------------------------------------------------------------------------------------------------------------------------------------------------------------------------------------------------------------------------------------------------------------------------------------------------------------------------------------------------------------------------------------------------------------------------------------------------------------------------------------------------------------------------------------------------------------------------------------------------------------------------------------------------------------------------------------------------------------------------------------------------------------------------------------------------------------------------------------------------------------------------------------------------------------------------------------------------------------------|
|                                                                                                                                                                                                                                   | <p>Response: Thank you for your suggestions. In order to make all the parameter setting clear, we have added the parameter of the software in the revised manuscript refer to the applied example. Thank you.</p> <p>3. Line 34: "only limited transcriptome data currently available"<br/> --This is untrue as there is a draft genome assembly available in GenBank: <a href="https://www.ncbi.nlm.nih.gov/nuccore/VSRR000000000.1">https://www.ncbi.nlm.nih.gov/nuccore/VSRR000000000.1</a><br/> This available draft should be acknowledged in the manuscript (even though the assembly in this current study is far superior).<br/> Response: Sorry for this mistake. We have corrected this description and added the comparison between our genome and the published genome. This table was added in the revised supplementary files (Table S5). Thank you.</p> <p>4. Line 70: "genomic research on the swimming crab has only been conducted at the transcriptome level [14-16], with the whole genome not yet described. --Likewise, this line should be updated to mention this draft genome."<br/> Response: Sorry for this mistake. We have corrected this mistake in the revised manuscript.</p> <p>5. Line 84: "Muscle RNA was also extracted using TRIzol (Invitrogen) according to the manufacturer's instructions" -- Should clarify whether the same animal used was used for extraction of RNA as the genome. Indeed it should also be noted if the same animal was used for all genomic sequencing.<br/> Response: Thank you for your suggestions. The same animal was used in all the RNA and DNA sequencing. We have corrected this in the revised manuscript.</p> <p>6. Line 297 (and line 300): "greater survival pressures on these two species"<br/> --I wouldn't attribute faster evolutionary rates to "survival pressures." Evolutionary rate has more to do with generation time (shorter=greater) and population size (larger=greater). The evolutionary rate makes sense in relation to both of these factors. Differences in survival pressures are heavily influenced by competition in large populations.<br/> Response: Thank you for your suggestions. We have modified the inappropriate words in the revised manuscript.</p> <p>7. Table 2: It seems as if the "Summary" row represents the percentage for "Complete BUSCO (C)." The label "Summary" does not make sense in this context. I would rename to "Summary (percentage Complete Busco)" or "percentage Complete Busco"<br/> Response: Thank you for your suggestions. We have corrected this mistake in the revised manuscript.</p> <p>8. I love Figure 1! Beautiful creature!<br/> Response: Thank you.</p> <p>9. Figure 2 and 3 legends should include more information. For example, what program was used to generate figure. What is the underlying data from, etc.<br/> Response: Thank you for your suggestions. We have added more information to describe these two figures in the revised manuscript. Thank you.</p> |
| <b>Additional Information:</b>                                                                                                                                                                                                    |                                                                                                                                                                                                                                                                                                                                                                                                                                                                                                                                                                                                                                                                                                                                                                                                                                                                                                                                                                                                                                                                                                                                                                                                                                                                                                                                                                                                                                                                                                                                                                                                                                                                                                                                                                                                                                                                                                                                                                                                                                                                                                                                                                                                                                                                                                                                                                                                                                                                                                                                                                                                                                                                                                                                                                                                                                                                                                                                                                                                                                 |
| <b>Question</b>                                                                                                                                                                                                                   | <b>Response</b>                                                                                                                                                                                                                                                                                                                                                                                                                                                                                                                                                                                                                                                                                                                                                                                                                                                                                                                                                                                                                                                                                                                                                                                                                                                                                                                                                                                                                                                                                                                                                                                                                                                                                                                                                                                                                                                                                                                                                                                                                                                                                                                                                                                                                                                                                                                                                                                                                                                                                                                                                                                                                                                                                                                                                                                                                                                                                                                                                                                                                 |
| Are you submitting this manuscript to a special series or article collection?                                                                                                                                                     | No                                                                                                                                                                                                                                                                                                                                                                                                                                                                                                                                                                                                                                                                                                                                                                                                                                                                                                                                                                                                                                                                                                                                                                                                                                                                                                                                                                                                                                                                                                                                                                                                                                                                                                                                                                                                                                                                                                                                                                                                                                                                                                                                                                                                                                                                                                                                                                                                                                                                                                                                                                                                                                                                                                                                                                                                                                                                                                                                                                                                                              |
| <b>Experimental design and statistics</b>                                                                                                                                                                                         | Yes                                                                                                                                                                                                                                                                                                                                                                                                                                                                                                                                                                                                                                                                                                                                                                                                                                                                                                                                                                                                                                                                                                                                                                                                                                                                                                                                                                                                                                                                                                                                                                                                                                                                                                                                                                                                                                                                                                                                                                                                                                                                                                                                                                                                                                                                                                                                                                                                                                                                                                                                                                                                                                                                                                                                                                                                                                                                                                                                                                                                                             |
| Full details of the experimental design and statistical methods used should be given in the Methods section, as detailed in our <a href="#">Minimum Standards Reporting Checklist</a> . Information essential to interpreting the |                                                                                                                                                                                                                                                                                                                                                                                                                                                                                                                                                                                                                                                                                                                                                                                                                                                                                                                                                                                                                                                                                                                                                                                                                                                                                                                                                                                                                                                                                                                                                                                                                                                                                                                                                                                                                                                                                                                                                                                                                                                                                                                                                                                                                                                                                                                                                                                                                                                                                                                                                                                                                                                                                                                                                                                                                                                                                                                                                                                                                                 |

|                                                                                                                                                                                                                                                                                                                                                                                                                                                                                                                                                         |            |
|---------------------------------------------------------------------------------------------------------------------------------------------------------------------------------------------------------------------------------------------------------------------------------------------------------------------------------------------------------------------------------------------------------------------------------------------------------------------------------------------------------------------------------------------------------|------------|
| <p>data presented should be made available in the figure legends.</p> <p>Have you included all the information requested in your manuscript?</p>                                                                                                                                                                                                                                                                                                                                                                                                        |            |
| <p><b>Resources</b></p> <p>A description of all resources used, including antibodies, cell lines, animals and software tools, with enough information to allow them to be uniquely identified, should be included in the Methods section. Authors are strongly encouraged to cite <a href="#">Research Resource Identifiers</a> (RRIDs) for antibodies, model organisms and tools, where possible.</p> <p>Have you included the information requested as detailed in our <a href="#">Minimum Standards Reporting Checklist</a>?</p>                     | <p>Yes</p> |
| <p><b>Availability of data and materials</b></p> <p>All datasets and code on which the conclusions of the paper rely must be either included in your submission or deposited in <a href="#">publicly available repositories</a> (where available and ethically appropriate), referencing such data using a unique identifier in the references and in the “Availability of Data and Materials” section of your manuscript.</p> <p>Have you have met the above requirement as detailed in our <a href="#">Minimum Standards Reporting Checklist</a>?</p> | <p>Yes</p> |

[Click here to view linked References](#)

1 **Chromosome-level genome assembly reveals the unique genome evolution of the**  
2 **swimming crab (*Portunus trituberculatus*)**

3

4 Boping Tang<sup>1,\*</sup>, Daizhen Zhang<sup>1,\*</sup>, Haorong Li<sup>2,\*</sup>, Senhao Jiang<sup>1</sup>, Huabin Zhang<sup>1</sup>, Fujun Xuan<sup>1</sup>,  
5 Baoming Ge<sup>1</sup>, Zhengfei Wang<sup>1</sup>, Yu Liu<sup>1</sup>, Zhongli Sha<sup>3</sup>, Yongxu Cheng<sup>5</sup>, Wei Jiang<sup>3</sup>, Hui Jiang<sup>4,6</sup>,  
6 Zhongkai Wang<sup>2</sup>, Kun Wang<sup>2</sup>, Chaofeng Li<sup>1</sup>, Yue Sun<sup>1</sup>, Shusheng She<sup>7</sup>, Qiang Qiu<sup>2</sup>, Wen Wang<sup>2</sup>,  
7 Xinzheng Li<sup>3</sup>, Yongxin Li<sup>2‡</sup>, Qiuning Liu<sup>1†</sup>, Yandong Ren<sup>2†</sup>

8

9 1. Jiangsu Key Laboratory for Bioresources of Saline Soils, Jiangsu Provincial Key Laboratory  
10 of Coastal Wetland Bioresources and Environmental Protection, Jiangsu Synthetic Innovation  
11 Center for Coastal Bio-agriculture, Yancheng Teachers University, Yancheng 224002, China

12 2. Center for Ecological and Environmental Sciences, Northwestern Polytechnical University,  
13 Xi'an 710072, China

14 3. Institute of Oceanology, Chinese Academy of Sciences, Qingdao 266071, China

15 4. National Engineering Laboratory of Marine Germplasm Resources Exploration and  
16 Utilization, Zhejiang Ocean University, Zhoushan 316022, China

17 5. Key Laboratory of Freshwater Aquatic Genetic Resources, Ministry of Agriculture and Rural  
18 Affairs, Shanghai Ocean University, Shanghai 201306, China

19 6. National Engineering Research Center for Facilitated Marine Aquaculture, Zhejiang Ocean  
20 University, Zhoushan 316022, China

21 7. China Hong Kong Ecology Consultant Company, Hong Kong, China

22

23 \*These authors contributed equally to this work.

24 †Corresponding authors: Yandong Ren (renyandong90@126.com); Qiuning Liu  
25 (liuqiuning@163.com).

26 ‡Senior author: Yongxin Li (yxli28science@sina.com)

27

28 **ORCID:**

29 Yandong Ren: 0000-0003-1595-8994

30 Yongxin Li: 0000-0002-9555-1387  
31 Wen Wang: 0000-0002-7801-2066  
32 Zhongkai Wang: 0000-0003-0578-5735  
33 Kun Wang: 0000-0001-6059-6529  
34 Qiang Qiu: 0000-0002-9874-271X

35

## 36 **Abstract**

37 **Background:** The swimming crab, *Portunus trituberculatus*, is an important commercial  
38 species in China and is widely distributed in the coastal waters of Asia-Pacific countries.  
39 Despite increasing interest in swimming crab research, a high quality chromosome-level  
40 genome is still missing. **Findings:** Here, we assembled the first chromosome-level reference  
41 genome of *P. trituberculatus* by combining the short reads, Nanopore long reads, and Hi-C data.  
42 The genome assembly size was 1.00 Gb with a contig N50 length of 4.12 Mb. In addition,  
43 BUSCO assessment indicated that 94.7% of core eukaryotic genes were present in the genome  
44 assembly. Approximately 54.52% of the genome was identified as repetitive sequences, with a  
45 total of 16,796 annotated protein-coding genes. In addition, we anchored contigs into  
46 chromosomes and identified 50 chromosomes with a N50 length of 21.80 Mb by Hi-C  
47 technology. **Conclusions:** We anticipate that this chromosome-level assembly of the *P.*  
48 *trituberculatus* genome will not only promote study of basic development and evolution but  
49 also provide important resources for swimming crab reproduction.

50

51 **Keywords:** *Portunus trituberculatus*; genome assembly; crab; chromosome; evolution

52

## 53 **Introduction**

54 The swimming crab, *Portunus trituberculatus* (NCBI: txid210409,  
55 marinespecies.org:taxname:1061762), belonging to Brachyura, Portunidae, Portunus, is  
56 named for its shuttle-shaped head breastplate and three verrucous bumps on the back of the  
57 stomach and heart regions [1, 2]. The chelipeds of swimming crabs are well developed for  
58 feeding and attacking, with the first three pairs and last pair used for crawling and swimming,  
59 respectively [3, 4]. Male and female crabs are distinguished by their type of abdomen, with  
60 the male having a triangular abdomen and the female having an almost circular one [5]. Due  
61 to their lack of drilling ability, swimming crabs often live in soft mud or sand [6] or in



62 seagrass near the shore, and also show a certain level of phototaxis, spending time on the sea  
63 floor during the day and foraging at night [5]. Swimming crabs are also omnivorous, feeding  
64 on shellfish, small fish, shrimp, algae, and decomposing animal and plant carcasses [7].  
65 The swimming crab is widely distributed in the coastal waters of Korea, Japan, China, and  
66 Southeast Asia and is one of the most valuable marine crustaceans in Asia [8] . It is widely  
67 found in Chinese coastal waters of the Bohai Sea, Yellow Sea, East China Sea, and South China  
68 Sea and is an important commercially cultured species [9]. Swimming crabs are considered  
69 highly nutritious, especially in regard to crab cream, and are very popular in China [10, 11]. As  
70 a result, the crab has been heavily overfished, resulting in substantial declines in its natural  
71 population [12] and initiation of artificial breeding [13, 14]. With continued research on the  
72 crab, it has become clear that morphological, physiological, but the genetic changes are poorly  
73 understood. At present, several studies of swimming crab on genomic research have been  
74 carried out [15-18], but the high-quality chromosome-level genome is still missing.

75 In the present study, we constructed a chromosome-level genome assembly of *P. trituberculatus*  
76 by combining short reads, Nanopore long reads, and Hi-C sequencing data. This chromosome-  
77 level genome will not only promote study on development and evolution, but also provide  
78 important resources for reproductive studies of *P. trituberculatus* and other crab species.

79

### 80 **Sampling, library construction, and sequencing**

81 A male swimming crab was collected in Bohai Bay, Hebei Province, China, for sequencing  
82 (Figure 1). To obtain sufficient high-quality DNA for the Oxford Nanopore (Oxford, UK) and  
83 BGISEQ-500 platforms (BGI, China), the swimming crab was rinsed five times with clean  
84 water and dissected immediately. Fresh muscle tissue was collected and snap-frozen in liquid  
85 nitrogen. The samples were then used to extract DNA with a Qiagen Blood & Cell Culture DNA  
86 Mini Kit and prepared for Nanopore, BGISEQ-500, and Hi-C sequencing. Using the same  
87 individual, muscle RNA was also extracted using TRIzol (Invitrogen) according to the  
88 manufacturer's instructions. To obtain an overview of the transcriptome, polyadenylated RNA  
89 was chosen by oligo (dT) purification and reverse-transcribed to cDNA and sequenced using  
90 the BGISEQ-500 platform.

91 Extracted DNA was sequenced using both the BGISEQ and Oxford Nanopore platforms. The

92 short reads generated from the BGISEQ platform were used for estimation of genome size and  
93 error correction of the assembled genome, and the Nanopore long reads were used for genome  
94 assembly. To this end, one library with insertion lengths of ~300 bp was sequenced on the  
95 BGISEQ-500 platform, and another library with an average length of 20 kb was constructed  
96 using the Oxford Nanopore platform according to the manufacturers' protocols.

97

#### 98 **Data filtering**

99 Three different sources of reads were used to achieve the high-quality genome assembly, i.e.,  
100 Nanopore long reads, short reads, and Hi-C reads. Thus, we used different methods for filtering.  
101 For the Nanopore long reads, any reads less than 1 kb or with a mean quality value of < 7 were  
102 removed. For the short reads, any read with more than 10% unknown bases (usually stand by  
103 "N") or with more than 50% low-quality bases were removed, and its paired-end read was also  
104 removed. All adaptor sequences and duplicated reads produced by polymerase chain reaction  
105 (PCR) were removed. The low-quality Hi-C reads were filtered using HiC-Pro v2.10.0 [19]  
106 with default parameters..

107

#### 108 **Genome characteristic estimation**

109 All filtered BGISEQ short reads were used for estimation of genome size and other  
110 characteristics. In addition, 17-mer was chosen for k-mer analysis and the 17-mer depth  
111 frequency distribution was calculated using the k-mer method. Genome size was estimated as:  
112  $\text{Genome size} = \text{TKN}_{17\text{-mer}} / \text{PKFD}_{17\text{-mer}}$ , where TKN<sub>17-mer</sub> is the total k-mer number and  
113 PKFD<sub>17-mer</sub> is the peak k-mer frequency depth of 17-mer. The estimated genome size was  
114 used to determine subsequent genome assembly results.

115

#### 116 **Genome assembly**

117 To improve the quality of the genome and reduce the error ratio, self-error correction of all  
118 Nanopore long reads was performed using NextDenovo software [20]. The error-corrected  
119 Nanopore long reads were then used to assemble the raw genome via contig construction with  
120 WTDBG software (WTDBG, RRID:SCR\_017225) [21] and parameters: -p 0 -k 15 -AS 2 -E 1

121 -s 0.05 -L 5000. The assembled genomic sequences were further polished by Racon v1.2.1 [22]  
122 with four iterations using all the error-corrected Nanopore long reads with default parameters.  
123 After this, all filtered BGISEQ short reads were polished by Pilon v1.21 (Pilon,  
124 RRID:SCR\_014731) [23] at the single-base level with default parameters. After completion of  
125 the error-correction steps, the Hi-C data were used to obtain a chromosome-level genome  
126 assembly. All Hi-C sequencing data were first filtered by Hic-Pro v2.10.0 [19] with default  
127 parameters and then mapped to the polished swimming crab genome to improve the connection  
128 integrity of the contigs. Finally, 3D *de novo* assembly software (v180419) [24] with default  
129 parameters was used to determine contig location and direction.

130

### 131 **Genome assembly evaluation**

132 Three different strategies were used to evaluate the completeness and accuracy of the assembled  
133 genome. First, the quality of the assembled genome and gene completeness were assessed using  
134 BUSCO (BUSCO, RRID:SCR\_015008) [25] with the core gene sets of the eukaryote and  
135 metazoan databases, respectively. Second, all filtered short reads generated by BGISEQ were  
136 mapped to the assembled genome using BWA-MEM v0.7.12 [26] to detect genome integrity  
137 with default parameters. Third, transcripts were mapped to the assembled genome using BLAT  
138 software (BLAT, RRID:SCR\_011919) [27] with e value less than 10<sup>-5</sup>.

139

### 140 **Repetitive element annotation**

141 Tandem repeats and transposable elements (TEs) were also annotated in the chromosome-level  
142 genome. Tandem repeats were annotated using Tandem Repeat Finder v4.04 [28] with default  
143 parameters. The TEs were annotated at the protein level using RepeatProteinMask (RM-  
144 BLASTX) to search the protein database and at the DNA level using RepeatMasker (open-4.0.7,  
145 RepeatMasker, RRID:SCR\_012954) [29] to search the *de novo* libraries and rebase. The *de*  
146 *novo*-repeat libraries were constructed using RepeatModeler (RepeatModeler,  
147 RRID:SCR\_015027) [30], with consensus sequences used for *de novo* library construction and  
148 all software were using the default parameters.

149

150 **Gene structure prediction and function annotation**

151 After repetitive element annotation, the repeat-masked genome was used for gene set  
152 annotation with three different methods, i.e., *de novo* prediction, RNA-seq-based annotation,  
153 and homology-based annotation. We first assembled the RNA-seq reads into transcripts using  
154 Bridger r2014-12-01 (Bridger, RRID:SCR\_017039) [31]. The assembled genome and  
155 transcripts were then used for Augustus training to obtain an accurate Augustus annotation  
156 species model. Augustus v2.5.5 (Augustus, RRID:SCR\_008417) [32] was used for *de novo*  
157 prediction of coding genes with the previous training results. Second, proteins of *Bicyclus*  
158 *anyana* (GCF\_900239965.1) [33], *Bombus terrestris* (GCF\_000214255.1) [34], *Drosophila*  
159 *melanogaster* (GCA\_000001215.4) [35], *Mus musculus* (GCF\_000001635.26) [36],  
160 *Stegodyphus mimosarum* (GCA\_000611955.2), *Penaeus vannamei* (GCA\_003789085.1),  
161 *Mesobuthus martensii* [37], *Eriocheir japonica sinensis* (i.e., *Eriocheir sinensis*) (GigaDB:  
162 100186) [38-43], and *Tachypleus tridentatus* (GCA\_004102145.1) [44] were downloaded from  
163 the NCBI, GigaDB, or their own databases. The longest transcript of each gene was selected  
164 for further annotation and phylogenetic analysis. All filtered genes were searched with an e-  
165 value cutoff of 1e-5, with the *blast* results then formatted and prepared for Genewise [45]  
166 prediction of the gene structure of the swimming crab genome. Third, for the RNA-seq-based  
167 method, all assembled transcripts were aligned against the genome using BLAT [27]  
168 (identity >90% and coverage >90%), with PASA used to filter overlaps to link the spliced  
169 alignments. Finally, EvidenceModeler (EVM; EvidenceModeler, RRID:SCR\_014659) v1.1.1  
170 was used to integrate the above data into an EVM-derived gene set [46].

171 Five different public protein databases were used for gene functional annotation of the  
172 swimming crab, with InterProScan v4.8 (InterProScan, RRID:SCR\_005829) [47] used to  
173 screen proteins against the five databases (Pfam, release 27.0, PRINTS, release 42.0, PROSITE,  
174 release 20.97, ProDom, 2006.1, and SMART, release 6.2) to determine the number of InterPro  
175 and GO predicted protein-coding genes. In addition, the Kyoto Encyclopedia of Genes and  
176 Genomes, UniProt/SwissProt, and UniProt/TrEMBL databases were also used for functional  
177 annotation with BLAST v2.3.0 [48]. Blastp (BLASTP, RRID:SCR\_001010) was used in this  
178 step, and the e value was set as 10<sup>-5</sup> and other parameters were set as defaults.

179

### 180 **Identification of orthologous genes**

181 The annotated genes in the swimming crab and six other species, including *Aedes aegypti*  
182 (GCF\_002204515.2), *B.anynana*, *D. melanogaster*, *S. mimosarum*, *P.vannamei*, and *E. j.*  
183 *sinensis*, were used for orthologous gene identification with OrthoMCL v2.0.9 [49] with default  
184 parameters. The identified genes were then used to run reciprocal alignment and pairwise  
185 relationship analysis. The reciprocal best similarity pairs in different species were considered  
186 as putative orthologous genes and reciprocal better similarity pairs in one species were  
187 considered as paralogous genes. The 1:1:1:1:1:1 single-copy genes in the seven species were  
188 also identified for further phylogenetic and divergence time estimation analysis.

189

### 190 **Phylogenetic analysis and divergence time estimation**

191 Using the single-copy genes of the seven species (*P. trituberculatus*, *A. aegypti*, *B. anynana*, *D.*  
192 *melanogaster*, *S. mimosarum*, *P. vannamei*, and *E. j. sinensis*), we connected the genes in each  
193 species into one super-gene for phylogenetic tree building. Maximum likelihood-based  
194 phylogenetic analysis was conducted using RAxML v8.2.10 (RAxML, RRID:SCR\_006086)  
195 [50] with default parameters. The MCMCTREE program in the PAML package v4.8 [51] was  
196 then used to calculate divergence time, with all fossil records downloaded from the TIMETREE  
197 website [52] for calibration.

198

### 199 **Relative evolution rate**

200 The relative evolution rate of species was analyzed with LINTRE software (version 1) [53]  
201 using the *tpcv* model and *S. mimosarum* as an outgroup. Using the default parameters of  
202 LINTRE, we then evaluated the relative evolution rate between the swimming crab and other  
203 related species.

204

### 205 **Gene family expansion and contraction**

206 Using the divergence time results calculated by MCMCTREE and the gene pairwise  
207 relationships calculated by OrthoMCL [49], we determined gene family expansion and

208 contraction for each node using CAFÉ v3.1 (CAFÉ, RRID:SCR\_005983) [54]. The expansion  
209 and contraction genes of the swimming crab were extracted for GO/KEGG enrichment analysis  
210 [55, 56].

211

## 212 **Results**

### 213 **Chromosome level genome assembly**

214 To obtain a high-quality chromosome-level swimming crab genome, we extracted high-quality  
215 DNA from the muscle tissue and constructed libraries for genome sequencing. To estimate the  
216 genome characteristics of the swimming crab, we generated 205.40 Gb of BGISEQ data  
217 (Additional File: Table S1), with 17-mer analysis indicating a genome size of ~918.52Mb and  
218 the heterozygosity rate is ~0.9% (Additional File: Figure S1). In total, we generated 54.97 Gb  
219 (54.75-fold coverage) of Nanopore long read data with N50 over 20kb (Additional File: Table  
220 S2). The Nanopore long reads were assembled into contigs using WTDBG software [21]  
221 (genome size: 1.00 Gb; N50: 4.12 Mb) (Table 1). To further improve genome accuracy, we  
222 aligned all corrected Nanopore long reads to the assembled genome and conducted error-  
223 correction using Racon [22] with four iterations. The genome was subsequently corrected using  
224 all filtered BGISEQ clean reads via Pilon [23] with two iterations. We then constructed the  
225 chromosome-level genome with 95.95 Gb of Hi-C sequencing data (Additional File: Table S3)  
226 by 3D *de novo* assembly [24]. Finally, we obtained 50 chromosomes and a mounting rate (total  
227 length of the contigs that anchored to chromosomes divided by the total length of all assembled  
228 contigs) of 97.80% (Figure 2; Additional File: Table S4), which is the first chromosome-level  
229 crab genome with N50 of 21.79 Mb (Table 1). The high mounting rate suggested successful  
230 assembly of the swimming crab genome at the chromosome level. We also compared our  
231 assembled genome to the published swimming crab genome, the assembly quality of our  
232 genome is better than the previous one (Table S5). Due to the previous study has the genomic  
233 markers, we also mapped all the markers to our genome, and found that 99.40% (10,897 of  
234 10,963) markers can be mapped to our genome. Among these mapped genome marker, 98.83%  
235 (10,769 of 10,897) are exactly mapped to our assembled 50 chromosomes (Table S6). All these  
236 results shown that, we obtained a high quality and quite complete chromosome-level genome.

237

### 238 **Genome quality evaluation**

239 We next assessed the completeness of the swimming crab genome by BUSCO [25] and  
240 identified 94.7% Eukaryota and 92.9% Metazoa conserved core genes in the genome (Table 2).  
241 We checked the mapping rates of the BGISEQ short reads to our genome and found that 95.85%  
242 of reads were properly pair-mapped to the genome (Additional File: Table S7). We then *de novo*  
243 assembled the transcripts using the RNA-seq data (Additional File: Table S8) with Bridger  
244 software [31] and a N50 length of 2,124 bp (Additional File: Table S9). After transcript  
245 mapping, we found that 97.80% of the transcripts could be mapped to the swimming crab  
246 genome (Additional File: Table S10). We also analyzed the genome quality of previously  
247 published high-quality genomes from closely related species and determined that the quality of  
248 the assembled chromosome-level swimming crab genome was markedly higher or comparable  
249 with that of other species (Additional File: Table S11). In summary, these results indicated that  
250 we acquired a high-quality swimming crab genome. To investigate genome characteristics, such  
251 as GC content, we analyzed the GC distribution in the genome with a slide-window method.  
252 The peak value of GC content was ~41%, which agrees with the average GC content in the  
253 swimming crab genome. We also found that the GC content in the swimming crab was closer  
254 to that of mouse than of shrimp (Additional File: Figure S2).

255

### 256 **Genome annotation**

257 The repetitive sequences of the swimming crab genome were identified through four different  
258 methods, resulting in 547.39 Mb of repeated sequences and accounting for 54.52% of the  
259 assembled genome (Additional File: Table S12). Among the repeated sequences, 19.28%  
260 (~193.56 Mb) were tandem repeats and 52.29% (~525.49 Mb) were TEs (Additional File: Table  
261 S12; Table 3). The TEs could be further divided into four main types, including 0.014%  
262 (~142.88kb) of short interspersed elements (SINE), 15.23% (~153.03 Mb) of long interspersed  
263 elements (LINE), 14.90% (~149.71 Mb) of DNA elements, and 4.50% (~45.19 Mb) of long  
264 terminal repeats (LTR) (Table 3).

265 After masking the repeated sequences, we annotated the protein-coding genes using *de novo*

266 prediction, homology-based prediction, and transcript-based prediction. We merged the results  
267 and obtained 16,791 protein-coding genes. We checked the quality of the annotated genes by  
268 comparing with several closely related species. Results showed that the mRNA, CDS, exon,  
269 intron length distributions of the swimming crab were similar to those of the closely related  
270 species, suggesting that the swimming crab annotation results were dependable (Figure 3).  
271 We also performed functional annotation of the 16,791 genes with InterPro, GO, KEGG,  
272 SwissProt, and TrEMBL. The highest annotation rate (74.77%) was found for SwissProt, in  
273 which 12,558 genes were annotated. In total, 16,053 genes (~95.58%) were annotated,  
274 indicating that most genes could be found in the public protein databases (Table 4). Thus, taken  
275 together, we acquired a high-quality protein-coding gene set for the swimming crab.

276

### 277 **Orthologous identification and gene family analysis**

278 For comparative genomics analysis of the swimming crab, we analyzed the orthologous gene  
279 relationships among several species, including *A. aegypti*, *B. anynana*, *D. melanogaster*, *S.*  
280 *mimosarum*, *P. vannamei*, and *E. j. sinensis* using OrthoMCL. In total, 15,503 gene families  
281 were clustered in the seven species and 1,018 one-to-one single-copy genes were identified  
282 (Figure 4A). Because the swimming crab has several unique characteristics, we employed gene  
283 family analysis and found 8,832 gene families shared among the seven species, with 328 gene  
284 families unique to the swimming crab (Figure 4B). We then employed functional analysis and  
285 identified 34 enriched KEGG terms (Additional File: Table S13), suggesting these unique gene  
286 families play important roles in the swimming crab.

287

### 288 **Phylogenetic relationships and divergence time**

289 Although the phylogenetic relationships of the swimming crab and closely related species have  
290 been analyzed in previous studies, most used few nuclear and mitochondrial genes. To  
291 determine the evolutionary relationship of the swimming crab, we analyzed all single-copy  
292 genes using RAxML software [50], with the spider used as the outgroup species. Results  
293 showed that the swimming crab has a close relationship with the Chinese mitten crab and  
294 shrimp (Figure 5A). The seven species of pancrustaceans—*P. trituberculatus*, *A. aegypti*, *B.*



295 *anyana*, *D. melanogaster*, *S. mimosarum*, *P. vannamei*, and *E. j. sinensis*—formed two clades:  
296 i.e., Hexapoda and Crustacea. The Hexapoda group consisted of all lepidopteran and dipterous  
297 insects, whereas the second clade comprised all other crustaceans, with *P. trituberculatus* and  
298 *E. j. sinensis* forming a Pleocyemata clade, followed by Dendrobranchiata shrimp (*P. vannamei*).  
299 In addition, Hexapoda and Crustacea were both found to be monophyletic (Figure 5A). To  
300 determine divergence time, we employed MCMCTREE analysis in the PAML package [51]  
301 and found that the Chinese mitten crab and swimming crab diverged ~183.5 million years ago  
302 (Mya), and diverged from shrimp ~428.5 Mya (Figure 5A).

303

#### 304 **Relative evolution rate**

305 Species in different environments can experience different survival pressures. As such, we  
306 conducted relative evolution rate analysis in LINTRE (version 1) [53], with spider as the  
307 outgroup species and swimming crab as the reference species. Results showed that the shrimp  
308 had the slowest evolution rate among the seven species, whereas the fruit fly and butterfly  
309 exhibited relatively fast evolution rates (Figure 5B; Additional File: Table S14). Interestingly,  
310 the slowest evolution rates were found among the Malacostraca (Figure 5B; Additional File:  
311 Table S14), suggesting the specific environments or habitats caused the different evolution rates  
312 of them.

313

#### 314 **Gene family expansion and contraction**

315 We performed gene family expansion and contraction analysis of the seven species using CAFÉ  
316 v4.0, and identified 148 and 25 expanded and contracted gene families ( $P < 0.05$ ) in the  
317 swimming crab, respectively. We then employed KEGG functional enrichment analysis of the  
318 expanded gene families and found that the HIF-1 signaling pathway ( $Q$ -value = 0.000109025),  
319 focal adhesion ( $Q$ -value = 0.000135977), Hippo signaling pathway ( $Q$ -value = 0.000184649),  
320 and insulin signaling pathway ( $Q$ -value = 0.000357592) were enriched (Additional File: Table  
321 S15). These biological processes are related to early development, hypoxia adaptation, and  
322 other key processes, which may help us better understand the evolution of swimming crab.

323

324 **Conclusions**

325 Based on BGISEQ, Nanopore, and Hi-C sequencing data, we assembled a chromosome-level  
326 high-quality genome of the swimming crab. Evaluation results indicated that the genome  
327 quality of swimming crab was comparable with that of most high-quality model species. We  
328 also successfully obtained 16,791 high-quality protein-coding genes by integrating three  
329 different methods. The genome and annotation data will help researchers better understand the  
330 evolution of crabs and improve their economic value. The phylogenetic results indicated that  
331 the swimming crab is closely related to the Chinese mitten crab, from which it diverged ~183.5  
332 Mya. The unique and/or expanded gene family analysis provides clues to swimming crab  
333 development and environmental adaptation.

334

335 **Availability of supporting data**

336 The raw sequencing data were deposited in the NCBI database under accession number  
337 PRJNA555262. The genome assembly and annotation results are available via the *GigaScience*  
338 repository GigaDB [57].

339

340 **Additional files**

341 Table S1: Statistics on genome sequencing data from BGISEQ platform.

342 Table S2: Statistics on sequencing reads from Oxford Nanopore platform.

343 Table S3: Statistics on Hi-C sequencing data.

344 Table S4: Statistics on assembled chromosome-level genome by 3D *de novo* assembly software.

345 Table S5. The quality comparison of these two genomes.

346 Table S6. The mapping results of genomic markers to the assembled genome.

347 Table S7: Statistics on mapping ratio of the BGISEQ short reads to swimming crab genome.

348 Table S8: Statistics on RNA-seq data.

349 Table S9: Statistics on assembled transcripts by Bridger software.

350 Table S10: Statistics on transcript mapping ratio of swimming crab genome.

351 Table S11: Genome quality comparison of swimming crab with other species.

352 Table S12: Statistics on annotated repetitive sequences using different software.

353 Table S13: KEGG enrichment analysis of unique gene families in swimming crab relative to

354 six other species.

355 Table S14: Two-cluster analysis of swimming crab and other species.

356 Table S15: KEGG enrichment analysis of expanded gene families in swimming crab.

357 Figure S1: 17-mer analysis of swimming crab genome.

358 Figure S2: GC distribution in species.

359

### 360 **Abbreviations**

361 Hi-C: High-throughput chromosome conformation capture; BUSCO: Benchmarking Universal  
362 Single-Copy Orthologs; CDS: Coding DNA Sequence; DNA: Deoxyribonucleic Acid; RNA:  
363 Ribonucleic Acid; RNA-seq: RNA sequencing; BLAST: Basic Local Alignment Search Tool;  
364 KEGG: Kyoto Encyclopedia of Genes and Genomes; NCBI: National Center for Biotechnology  
365 Information.

366

### 367 **Conflicts of interest**

368 The authors declare that they have no competing interests.

369

### 370 **Funding**

371 This study was supported by the National Natural Science Foundation of China (31672267,  
372 31640074), Jiangsu Agriculture Science and Technology Innovation Fund (CX(18)3027,  
373 CX(18)2027), Natural Science Foundation of Jiangsu Province (BK20171276, BK20160444),  
374 “Qing Lan Project” of Daizhen Zhang and China Postdoctoral Science Foundation  
375 (2018M642105).

376

### 377 **Author contributions**

378 Y.R., Q.L., Yongxin L., and X.L. conceived the project. B.T., D.Z., S.S., H.Z., Yu L., and S.J.  
379 collected and dissected the samples. H.L., Zhongkai W., K.W., Y.S., Q.Q., C.L., and Yongxin  
380 L. estimated genome size. F.X., Y.C., W.J., and H.J. assembled the genome. B.G., Zhengfei W.,  
381 Z.S., and B.T. performed genome assembly, genome annotation, and evolution analysis. Y.L.,  
382 B.T., Q.Q., and W.W. wrote the manuscript. Y.R. and W.W. revised the manuscript.

383

384 **REFERENCES**

- 385 1. Spiridonov VA, Neretina TV and Schepetov D. Morphological characterization and  
386 molecular phylogeny of Portunoidea Rafinesque, 1815 (Crustacea Brachyura):  
387 Implications for understanding evolution of swimming capacity and revision of the  
388 family-level classification. *Zoologischer Anzeiger - A Journal of Comparative Zoology*.  
389 2014;253 5:404-29.
- 390 2. Dai A, Yang S and Song Y. *Marine crabs in China Sea*. Beijing: Marine Publishing  
391 Company; 1986.
- 392 3. Okamoto K. Malformed regeneration of partly cut swimming leg as a marker for  
393 swimming crab *Portunus trituberculatus*. *Fisheries Science*. 2010;72 5:1121-3.
- 394 4. Hazlett, B.A. (1971). Interspecific Fighting in Three Species of Brachyuran Crabs  
395 from Hawaii. *Crustaceana*, 20(3), 308-314. [www.jstor.org/stable/20101793](http://www.jstor.org/stable/20101793)
- 396 5. Xue J, Du N, Wei L and Wu H. A review of studies on *portunus trituberculatus* in  
397 China. *Dongahi Marineence*. 1997.
- 398 6. Sakai T. *Crabs of Japan and the Adjacent Seas*. *Crabs of Japan & the Adjacent*  
399 *Seas*. 1976.
- 400 7. Wu RSS and Shin PKS. Food segregation in three species of portunid crabs.  
401 *Hydrobiologia*. 1997;362 1-3:107-13.
- 402 8. Marine Species Identification Portal: *Portunus trituberculatus* [http://species-](http://species-identification.org/species.php?species_group=crabs_of_japan&menuentry=soorten&i)  
403 [identification.org/species.php?species\\_group=crabs\\_of\\_japan&menuentry=soorten&i](http://species-identification.org/species.php?species_group=crabs_of_japan&menuentry=soorten&i)  
404 [d=1106&tab=beschrijving](http://species-identification.org/species.php?species_group=crabs_of_japan&menuentry=soorten&i).

- 405 9. Qi JB, Gu XL, Ma LB, Qiao ZG and Chen K. The research progress on food organism  
406 culture and technology utilization in crab seed production in ponds in China.  
407 Agricultural Sciences. 2013;4 10:563-9.
- 408 10. Su XR, Li TW, Ding MJ and Chien PK. Evaluation on nutritive value of *Portunus*  
409 *trituberculatus*. Chinese Journal of Oceanology & Limnology. 1997;15 2:168-72.
- 410 11. Wang Z, Sun L, Guan W, Zhou C, Tang B, Cheng Y, et al. De novo transcriptome  
411 sequencing and analysis of male and female swimming crab (*Portunus*  
412 *trituberculatus*) reproductive systems during mating embrace (stage II). BMC  
413 Genetics. 2018;19 1:3.
- 414 12. Dan S, Oshiro M, Ashidate M and Hamasaki K. Starvation of Artemia in larval rearing  
415 water affects post-larval survival and morphology of the swimming crab, *Portunus*  
416 *trituberculatus* (Brachyura, Portunidae). Aquaculture. 2016:S0044848615300442.
- 417 13. Hamasaki K, Obata Y, Dan S and Kitada S. A review of seed production and stock  
418 enhancement for commercially important portunid crabs in Japan. Aquaculture  
419 International. 2011;19 2:217-35.
- 420 14. Liu S, Sun J and Hurtado LA. Genetic differentiation of *Portunus trituberculatus*, the  
421 world's largest crab fishery, among its three main fishing areas. Fisheries Research.  
422 2013;148 148:38-46.
- 423 15. Lv J, Ping L, Yu W, Baoquan G, Ping C, Jian L, et al. Transcriptome Analysis of  
424 *Portunus trituberculatus* in Response to Salinity Stress Provides Insights into the  
425 Molecular Basis of Osmoregulation. Plos One. 2013;8 12:e82155.
- 426 16. Yang Y, Wang J, Han T, Liu T, Wang C, Xiao J, et al. Ovarian Transcriptome

- 427 Analysis of *Portunus trituberculatus* Provides Insights into Genes Expressed during  
428 Phase III and IV Development. *Plos One*. 2015;10 10:e0138862.
- 429 17. Meng X, Liu P, Jia F, Li J and Gao BQ. Correction: De novo Transcriptome Analysis  
430 of *Portunus trituberculatus* Ovary and Testis by RNA-Seq: Identification of Genes  
431 Involved in Gonadal Development. *Plos One*. 2015;10 7:e0133659.
- 432 18. Lv J, Gao B, Liu P, Li J and Meng X. Linkage mapping aided by de novo genome and  
433 transcriptome assembly in *Portunus trituberculatus*: applications in growth-related  
434 QTL and gene identification. *Scientific Reports*. 2017;7 1:7874.
- 435 19. Servant N, Varoquaux N, Lajoie B, Viara E, Chen CJ, Vert JP, et al. HiC-Pro: an  
436 optimized and flexible pipeline for Hi-C data processing. *Genome Biology*. 2015;16  
437 1:259.
- 438 20. "NextDenovo.". Nextomics, GitHub Repository.  
439 <https://github.com/Nextomics/NextDenovo/>. Nextomics. 2019.
- 440 21. Ruan J and Li H. Fast and accurate long-read assembly with wtdbg2. 2019.
- 441 22. Talay AC and Altılar DT. RACON: a routing protocol for mobile cognitive radio  
442 networks. In: *Acm Workshop on Cognitive Radio Networks 2009*.
- 443 23. Walker BJ, Abeel T, Shea T, Priest M, Abouelliel A, Sakthikumar S, et al. Pilon: An  
444 Integrated Tool for Comprehensive Microbial Variant Detection and Genome  
445 Assembly Improvement. *Plos One*. 2014;9 11:e112963.
- 446 24. Dudchenko O, Batra SS, Omer AD, Nyquist SK, Hoeger M, Durand NC, et al. De  
447 novo assembly of the *Aedes aegypti* genome using Hi-C yields chromosome-length  
448 scaffolds. *Science*. 2017;356 6333:92-5.

- 449 25. Simao FA, Waterhouse RM, Ioannidis P, Kriventseva EV and Zdobnov EM. BUSCO:  
450 assessing genome assembly and annotation completeness with single-copy  
451 orthologs. *Bioinformatics*. 2015;31 19:3210-2.
- 452 26. Li H and Durbin R. Fast and accurate short read alignment with Burrows-Wheeler  
453 transform. *Bioinformatics*. 2009;25 14:1754-60. doi:10.1093/bioinformatics/btp324.
- 454 27. Kent WJ. BLAT - The BLAST-like alignment tool. *Genome Research*. 2002;12 4:656-  
455 64.
- 456 28. Benson and G. Tandem repeats finder: a program to analyze DNA sequences.  
457 *Nucleic Acids Research*. 1999;27 2:573-80.
- 458 29. Bedell JA, Korf I and Gish W. MaskerAid : a performance enhancement to  
459 RepeatMasker. *Bioinformatics*. 2000;16 11:1040.
- 460 30. RepeatModeler. <http://www.repeatmasker.org/RepeatModeler>.
- 461 31. Chang Z, Li G, Liu J, Zhang Y, Ashby C, Liu D, et al. Bridger: a new framework for de  
462 novo transcriptome assembly using RNA-seq data. *Genome Biology*. 2015;16 1:30.
- 463 32. Stanke M and Waack S. Gene prediction with a hidden Markov model and a new  
464 intron submodel. *Bioinformatics*. 2003;19 suppl\_2:215--25.
- 465 33. Nowell RW, Elsworth B, Oostra V, Zwaan BJ and Blaxter M. A high-coverage draft  
466 genome of the mycalesine butterfly *Bicyclus anynana*. *GigaScience*. 2017;6 7:1-7.
- 467 34. Sadd BM, Barribeau SM, Bloch G, de Graaf DC, Dearden P, Elsik CG, et al. The  
468 genomes of two key bumblebee species with primitive eusocial organization. *Genome*  
469 *Biology*. 2015;16 1:76. doi:10.1186/s13059-015-0623-3.
- 470 35. Adams MD, Celniker SE, Holt RA, Evans CA, Gocayne JD, Amanatides PG, et al.

- 471 The Genome Sequence of *Drosophila melanogaster*. *Science*. 2000;287 5461:2185.
- 472 36. Waterston RH, Lindblad-Toh K, Birney E, Rogers J, Abril JF, Agarwal P, et al. Initial  
473 sequencing and comparative analysis of the mouse genome. *Nature*. 2002;420  
474 6915:520-62. doi:10.1038/nature01262.
- 475 37. Ma J and Shi YB. The *Mesobuthus martensii* genome reveals the molecular diversity  
476 of scorpion toxins. *Cell & bioscience*. 2014;4 1:1. doi:10.1186/2045-3701-4-1.
- 477 38. Linsheng S, Chao B, Yongju L, Lingling W, Xinxin Y, Jia L, et al. Draft genome of the  
478 Chinese mitten crab, *Eriocheir sinensis*. *GigaScience*. 2016;5 1:5.
- 479 39. Liu RY. Introduction to the classification of recent crustacean. In: Transactions of the  
480 Chinese crustacean society No. 4. The Chinese crustacean Society, Science Press,  
481 Beijing. 2003;No. 4:76-86.
- 482 40. Tang B, Zhou K, Song D, Yang G and Dai A. Molecular systematics of the Asian  
483 mitten crabs, genus *Eriocheir* (Crustacea: Brachyura). *Molecular Phylogenetics &  
484 Evolution*. 2003;29 2:309-16.
- 485 41. Song D. X. SLY. The Crustacea fauna of Hebei. Hebei Science and Technology  
486 Publishing House, Shijiazhuang. 2009:1-772.
- 487 42. Tang BP, Xin ZZ, Liu Y, Zhang DZ, Wang ZF, Zhang HB, et al. The complete  
488 mitochondrial genome of *Sesarmops sinensis* reveals gene rearrangements and  
489 phylogenetic relationships in Brachyura. 2017;12 6:e0179800.  
490 doi:10.1371/journal.pone.0179800.
- 491 43. Xuan F WX, Liu N, et al. Reproductive potential of individual male Chinese mitten  
492 crabs *Eriocheir japonica sinensis* in a local pond-reared broodstock: Implications for



493 parent crab selection and sex ratio optimization. *Aquac Res.* 2018;49:3498–507.

494 44. Gong L, Fan G, Ren Y, Chen Y, Qiu Q, Liu L, et al. Chromosomal level reference  
495 genome of *Tachypleus tridentatus* provides insights into evolution and adaptation of  
496 horseshoe crabs. 2019;19 3:744-56. doi:10.1111/1755-0998.12988.

497 45. Birney E and Durbin R. Using GeneWise in the Drosophila Annotation Experiment.  
498 *Genome Research.* 2000;10 4:547-8.

499 46. Haas BJ, Salzberg SL, Zhu W and Pertea M. Automated eukaryotic gene structure  
500 annotation using EVIDENCEModeler and the Program to Assemble Spliced  
501 Alignments. *Genome Biology.* 2008;9 1:R7.

502 47. Zdobnov EM and Apweiler R. InterProScan - an integration platform for the signature-  
503 recognition methods in InterPro. *Bioinformatics.* 2001;17 9:847-8.

504 48. Altschul SF. Basic local alignment search tool (BLAST). *Journal of Molecular Biology.*  
505 2012;215 3:403-10.

506 49. Li and L. OrthoMCL: Identification of Ortholog Groups for Eukaryotic Genomes.  
507 *Genome Research.* 2003;13 9:2178-89.

508 50. Stamatakis and A. RAxML version 8: a tool for phylogenetic analysis and post-  
509 analysis of large phylogenies. *Bioinformatics.* 2014;30 9:1312-3.

510 51. Yang and Ziheng. PAML: a program package for phylogenetic analysis by maximum  
511 likelihood. *Computer Applications in the Biosciences Cabios.* 1997;13 5:555.

512 52. TIMETREE. <http://www.timetree.org>.

513 53. Takezaki N, ., Rzhetsky A, . and Nei M, . Phylogenetic test of the molecular clock and  
514 linearized trees. *Molecular Biology & Evolution.* 1995;12 5:823-33.

- 515 54. De Bie T, Cristianini N, Demuth JP and Hahn MW. CAFE: a computational tool for the  
516 study of gene family evolution. *Bioinformatics*. 2006;22 10:1269-71.
- 517 55. Beissbarth T and Speed TP. GOstat: find statistically overrepresented Gene  
518 Ontologies within a group of genes. *Bioinformatics*. 2004;20 9:1464-5.
- 519 56. Huang DW, Sherman BT and Lempicki RA. Bioinformatics enrichment tools: paths  
520 toward the comprehensive functional analysis of large gene lists. *Nucleic Acids*  
521 *Research*. 2009;37 1:1.
- 522 57. Ren Y; Tang B; Li H; Jiang S; Xuan F; Ge B; Wang Z; Liu Y; Sha Z; Cheng Y; Jiang W; Jiang  
523 H; Wang Z; Wang K; Li C; Sun Y; She S; Qiu Q; Wang W; Li X; Li Y; Liu Q (2019):  
524 Supporting data for "Chromosome-level genome assembly reveals adaptive evolution of the  
525 swimming crab (*Portunus trituberculatus*)" *GigaScience Database*.  
526 <http://dx.doi.org/10.5524/100678>

527

528 **Table 1: Assembly of swimming crab genome.**

| Term                | Contig phase  |        | Hi-C phase    |        |
|---------------------|---------------|--------|---------------|--------|
|                     | Size (bp)     | Number | Size (bp)     | Number |
| N90                 | 439,683       | 334    | 11,273,125    | 41     |
| N80                 | 1,225,551     | 203    | 14,151,211    | 33     |
| N70                 | 2,035,154     | 141    | 16,942,622    | 27     |
| N60                 | 2,950,146     | 100    | 19,786,189    | 21     |
| N50                 | 4,121,416     | 71     | 21,793,880    | 17     |
| Max length          | 17,984,318    | -      | 42,710,960    | -      |
| Total length        | 1,004,084,521 | -      | 1,005,046,021 | -      |
| Number $\geq$ 100bp | -             | 2446   | -             | 523    |
| Number $\geq$ 10kb  | -             | 1756   | -             | 314    |

529 Note: Contig phase represents results assembled by WTDBG software, and Hi-C phase  
530 represents scaffold statistics of genome after chromosome assembly.

531

532 **Table 2: Quality evaluation of assembled swimming crab genome by BUSCO.**

| Library                            | Eukaryota | Metazoa |
|------------------------------------|-----------|---------|
| Complete BUSCO (C)                 | 287       | 909     |
| Complete and single-copy BUSCO (S) | 283       | 903     |
| Complete and duplicated BUSCO (D)  | 4         | 6       |
| Fragmented BUSCO (F)               | 2         | 19      |

|                              |       |       |
|------------------------------|-------|-------|
| Missing BUSCO (M)            | 14    | 50    |
| Total BUSCO groups searched  | 303   | 978   |
| Percentage of complete BUSCO | 94.7% | 92.9% |

533

534 **Table 3: Statistics on transposable elements (TEs) in swimming crab genome.**

| Type    | RepbasesTEs |             | TE proteins |             | <i>De novo</i> |             | Combined TEs |             |
|---------|-------------|-------------|-------------|-------------|----------------|-------------|--------------|-------------|
|         | Length (bp) | % in genome | Length (bp) | % in genome | Length (bp)    | % in genome | Length (bp)  | % in genome |
| DNA     | 131,799,733 | 13.11%      | 2,434,533   | 0.24%       | 19,288,080     | 1.92%       | 149,711,951  | 14.90%      |
| LINE    | 16,171,649  | 1.61%       | 75,759,827  | 7.54%       | 131,530,457    | 13.09%      | 153,027,744  | 15.23%      |
| SINE    | 142,878     | 0.01%       | 0           | 0           | 0              | 0           | 142,878      | 0.014%      |
| LTR     | 26,546,055  | 2.64%       | 10,195,324  | 1.01%       | 18,421,957     | 1.83%       | 45,189,365   | 4.50%       |
| Other   | 89,969,319  | 8.95%       | 0           | 0           | 211,157,523    | 21.01%      | 230,116,216  | 22.90%      |
| Unknown | 34,752      | 0.0035%     | 0           | 0           | 90,989,908     | 9.05%       | 91,007,921   | 9.06%       |
| Total   | 213,558,503 | 21.25%      | 88,375,336  | 8.79%       | 464,908,824    | 46.26%      | 525,492,271  | 52.29%      |

535

536 **Table 4: Functional annotation of predicted protein-coding genes.**

| Term        | Gene number | Percentage (%) |
|-------------|-------------|----------------|
| GO          | 8,712       | 51.87          |
| InterPro    | 11,691      | 69.61          |
| KEGG        | 10,880      | 64.78          |
| SwissProt   | 12,558      | 74.77          |
| TrEMBL      | 12,256      | 72.97          |
| Annotated   | 16,053      | 95.58          |
| Unannotated | 743         | 4.42           |
| Total       | 16,796      | 100            |

537

538

### 539 **Figure legends**

540 **Figure 1: Swimming crab, *Portunus trituberculatus*.** The adult male swimming crab collected  
541 from Bohai Bay, Hebei Province.

542

543 **Figure 2: Genome characteristics of swimming crab.** From outer circle to inner circle: gene

544 distribution, tandem repeats (TRP), long tandem repeats (LTR), long interspersed nuclear

545 elements (LINE) and the short interspersed nuclear elements (SINE), the DNA elements, and

546 the GC content of the genome.

547

548 **Figure 3: Annotation quality comparison of protein-coding genes.** We compared the

549 mRNA length, CDS length, exon length and intron length among these species, including: P.

550 trituberculatus, *A. aegypti*, *S. mimosarum*, *D. melanogaster*, and *P. vannamei*.

551

552

553 **Figure 4: Gene family analysis of swimming crab.** A. Orthologous genes among species. The

554 multiple copy orthologs are orthologs have multiple copy in one species, the single copy

555 orthologs are orthologs have only one copy in one species, the other orthologs are the rest

556 orthologs, the unclustered genes are genes have no homology with others, the unique paralogs

557 are genes only exists in one specific species. B: Unique and common gene families among these

558 species, including: *B. anynana*, *A. aegypti*, *D. melanogaster*, *P. vannamei*, *E. j. sinensis*, *S.*

559 *mimosarum*, and *P. trituberculatus*.

560

561 **Figure 5: Phylogenetic relationships, divergence time, and evolution rate analysis.** A.

562 Phylogenetic relationship and divergence time of species. Red dot represents fossil record used

563 here. B. Relative evolution rate of species.

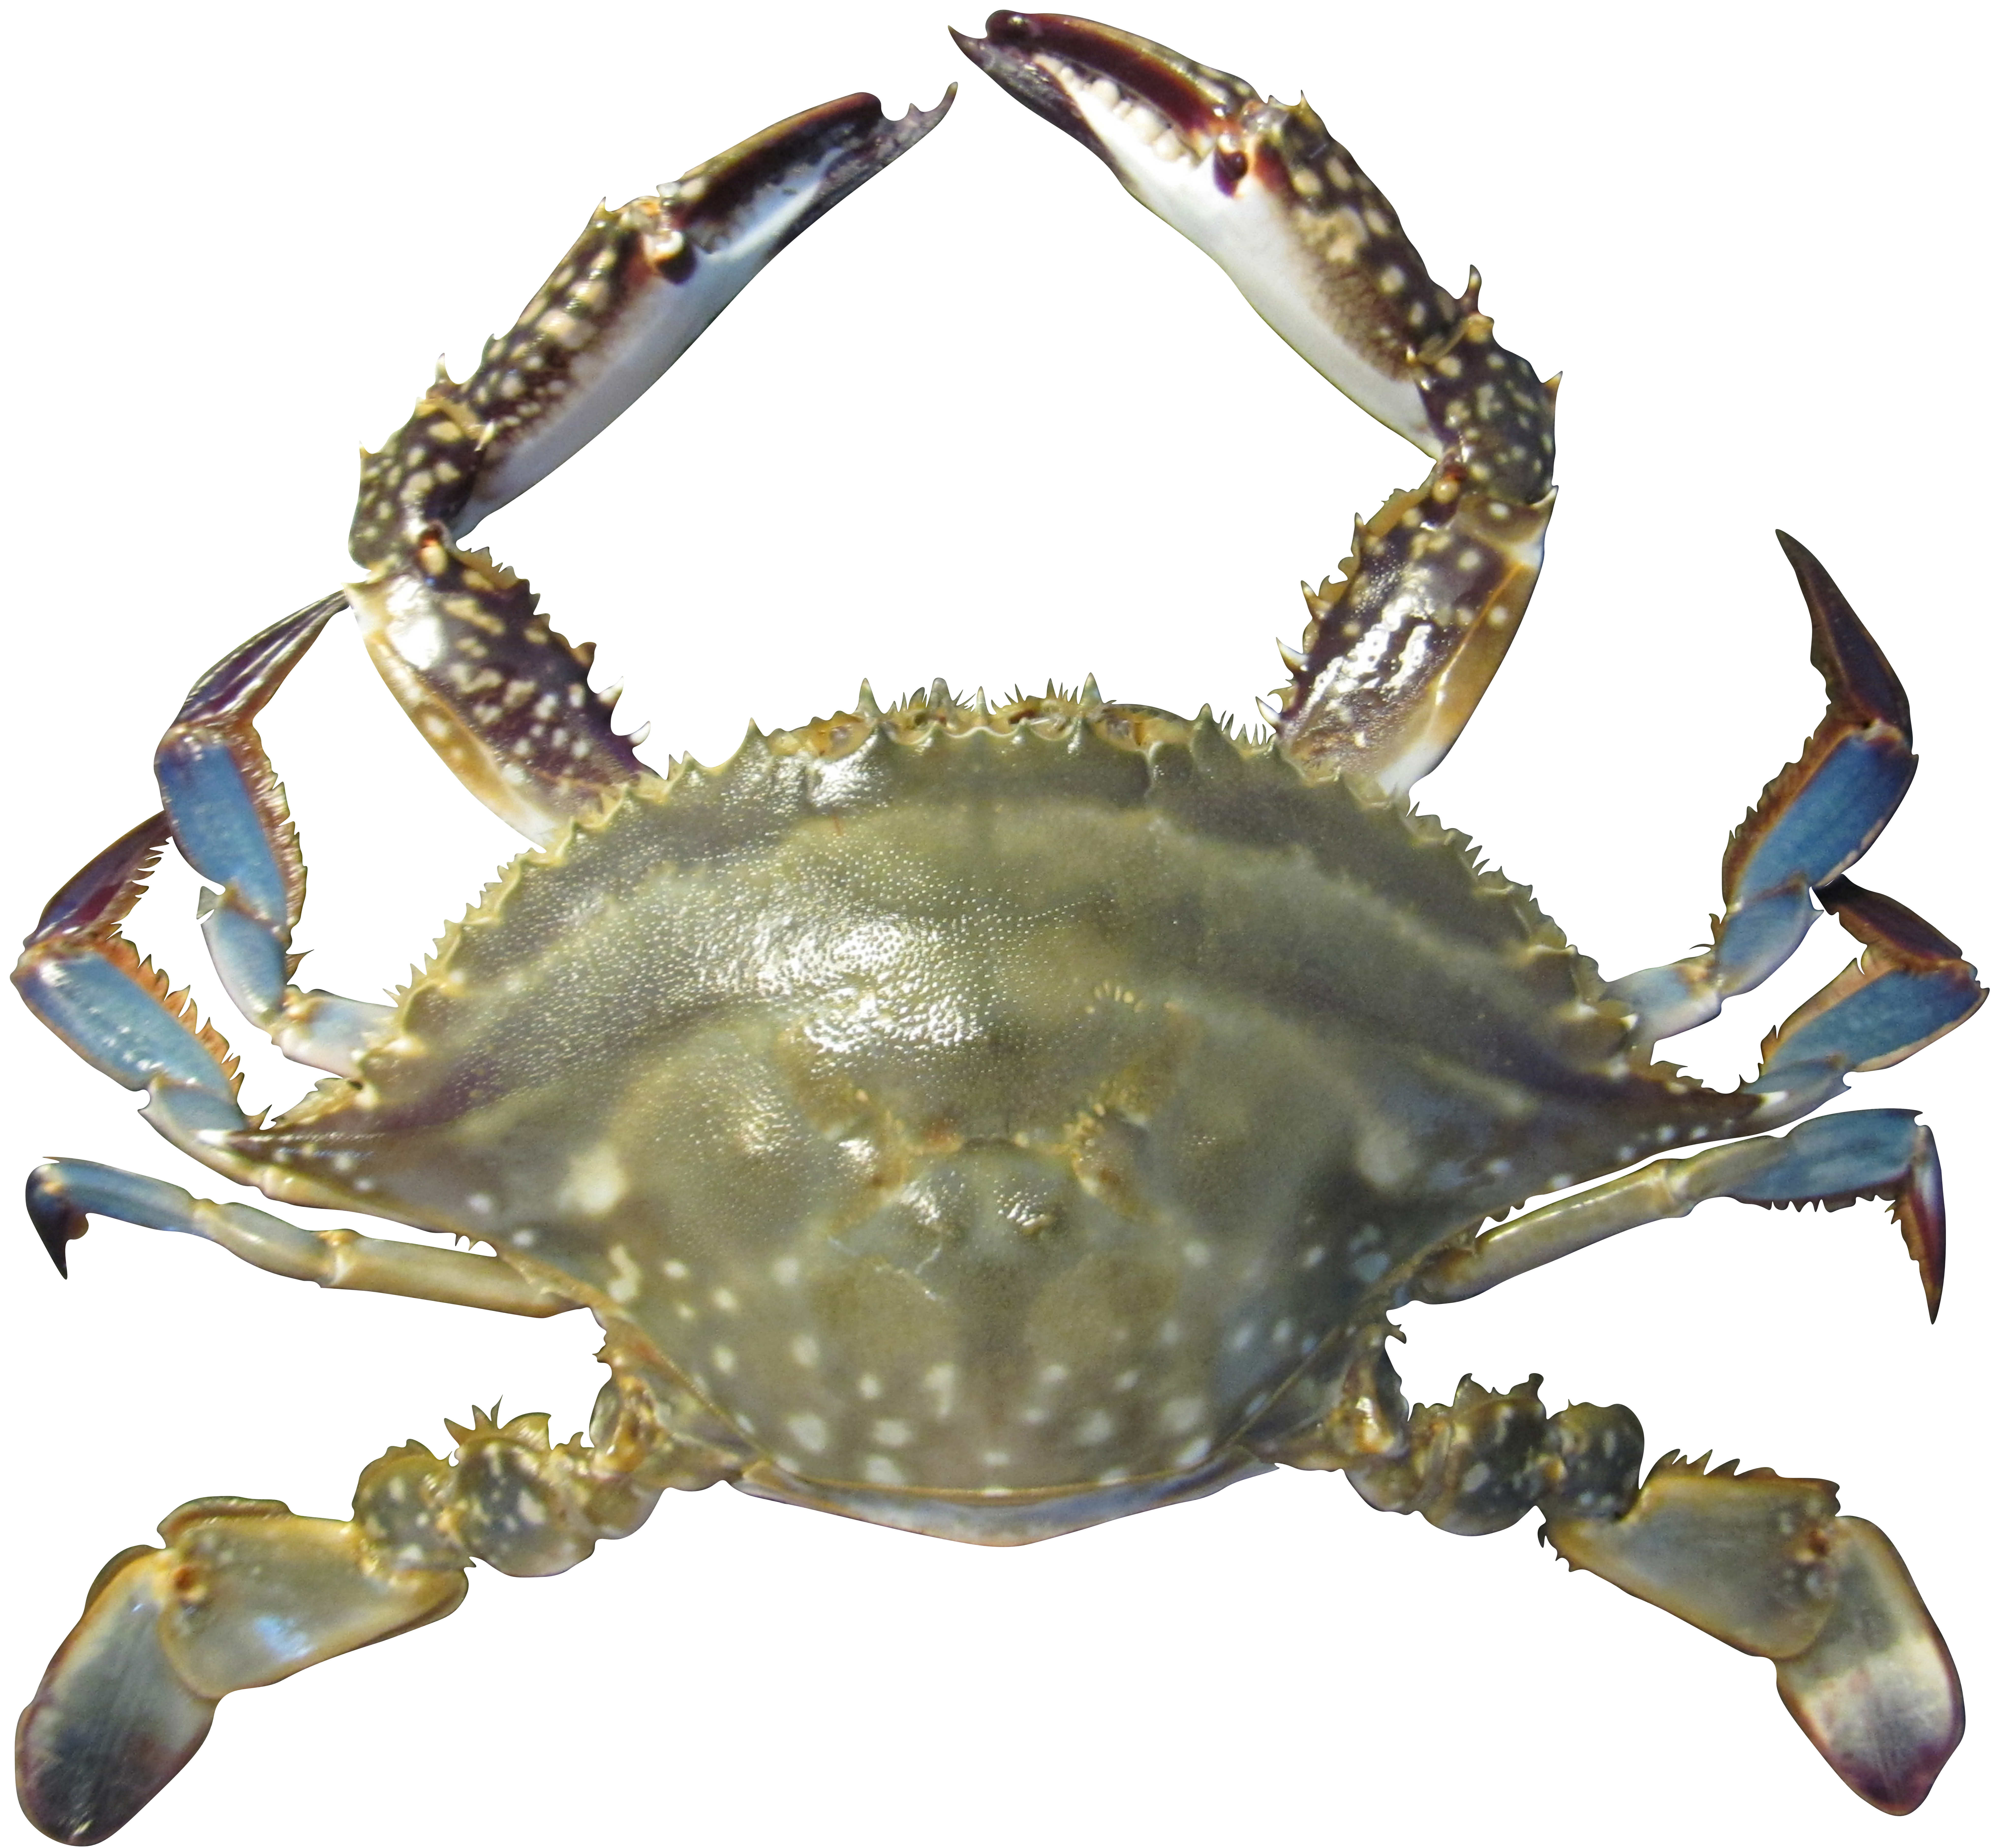

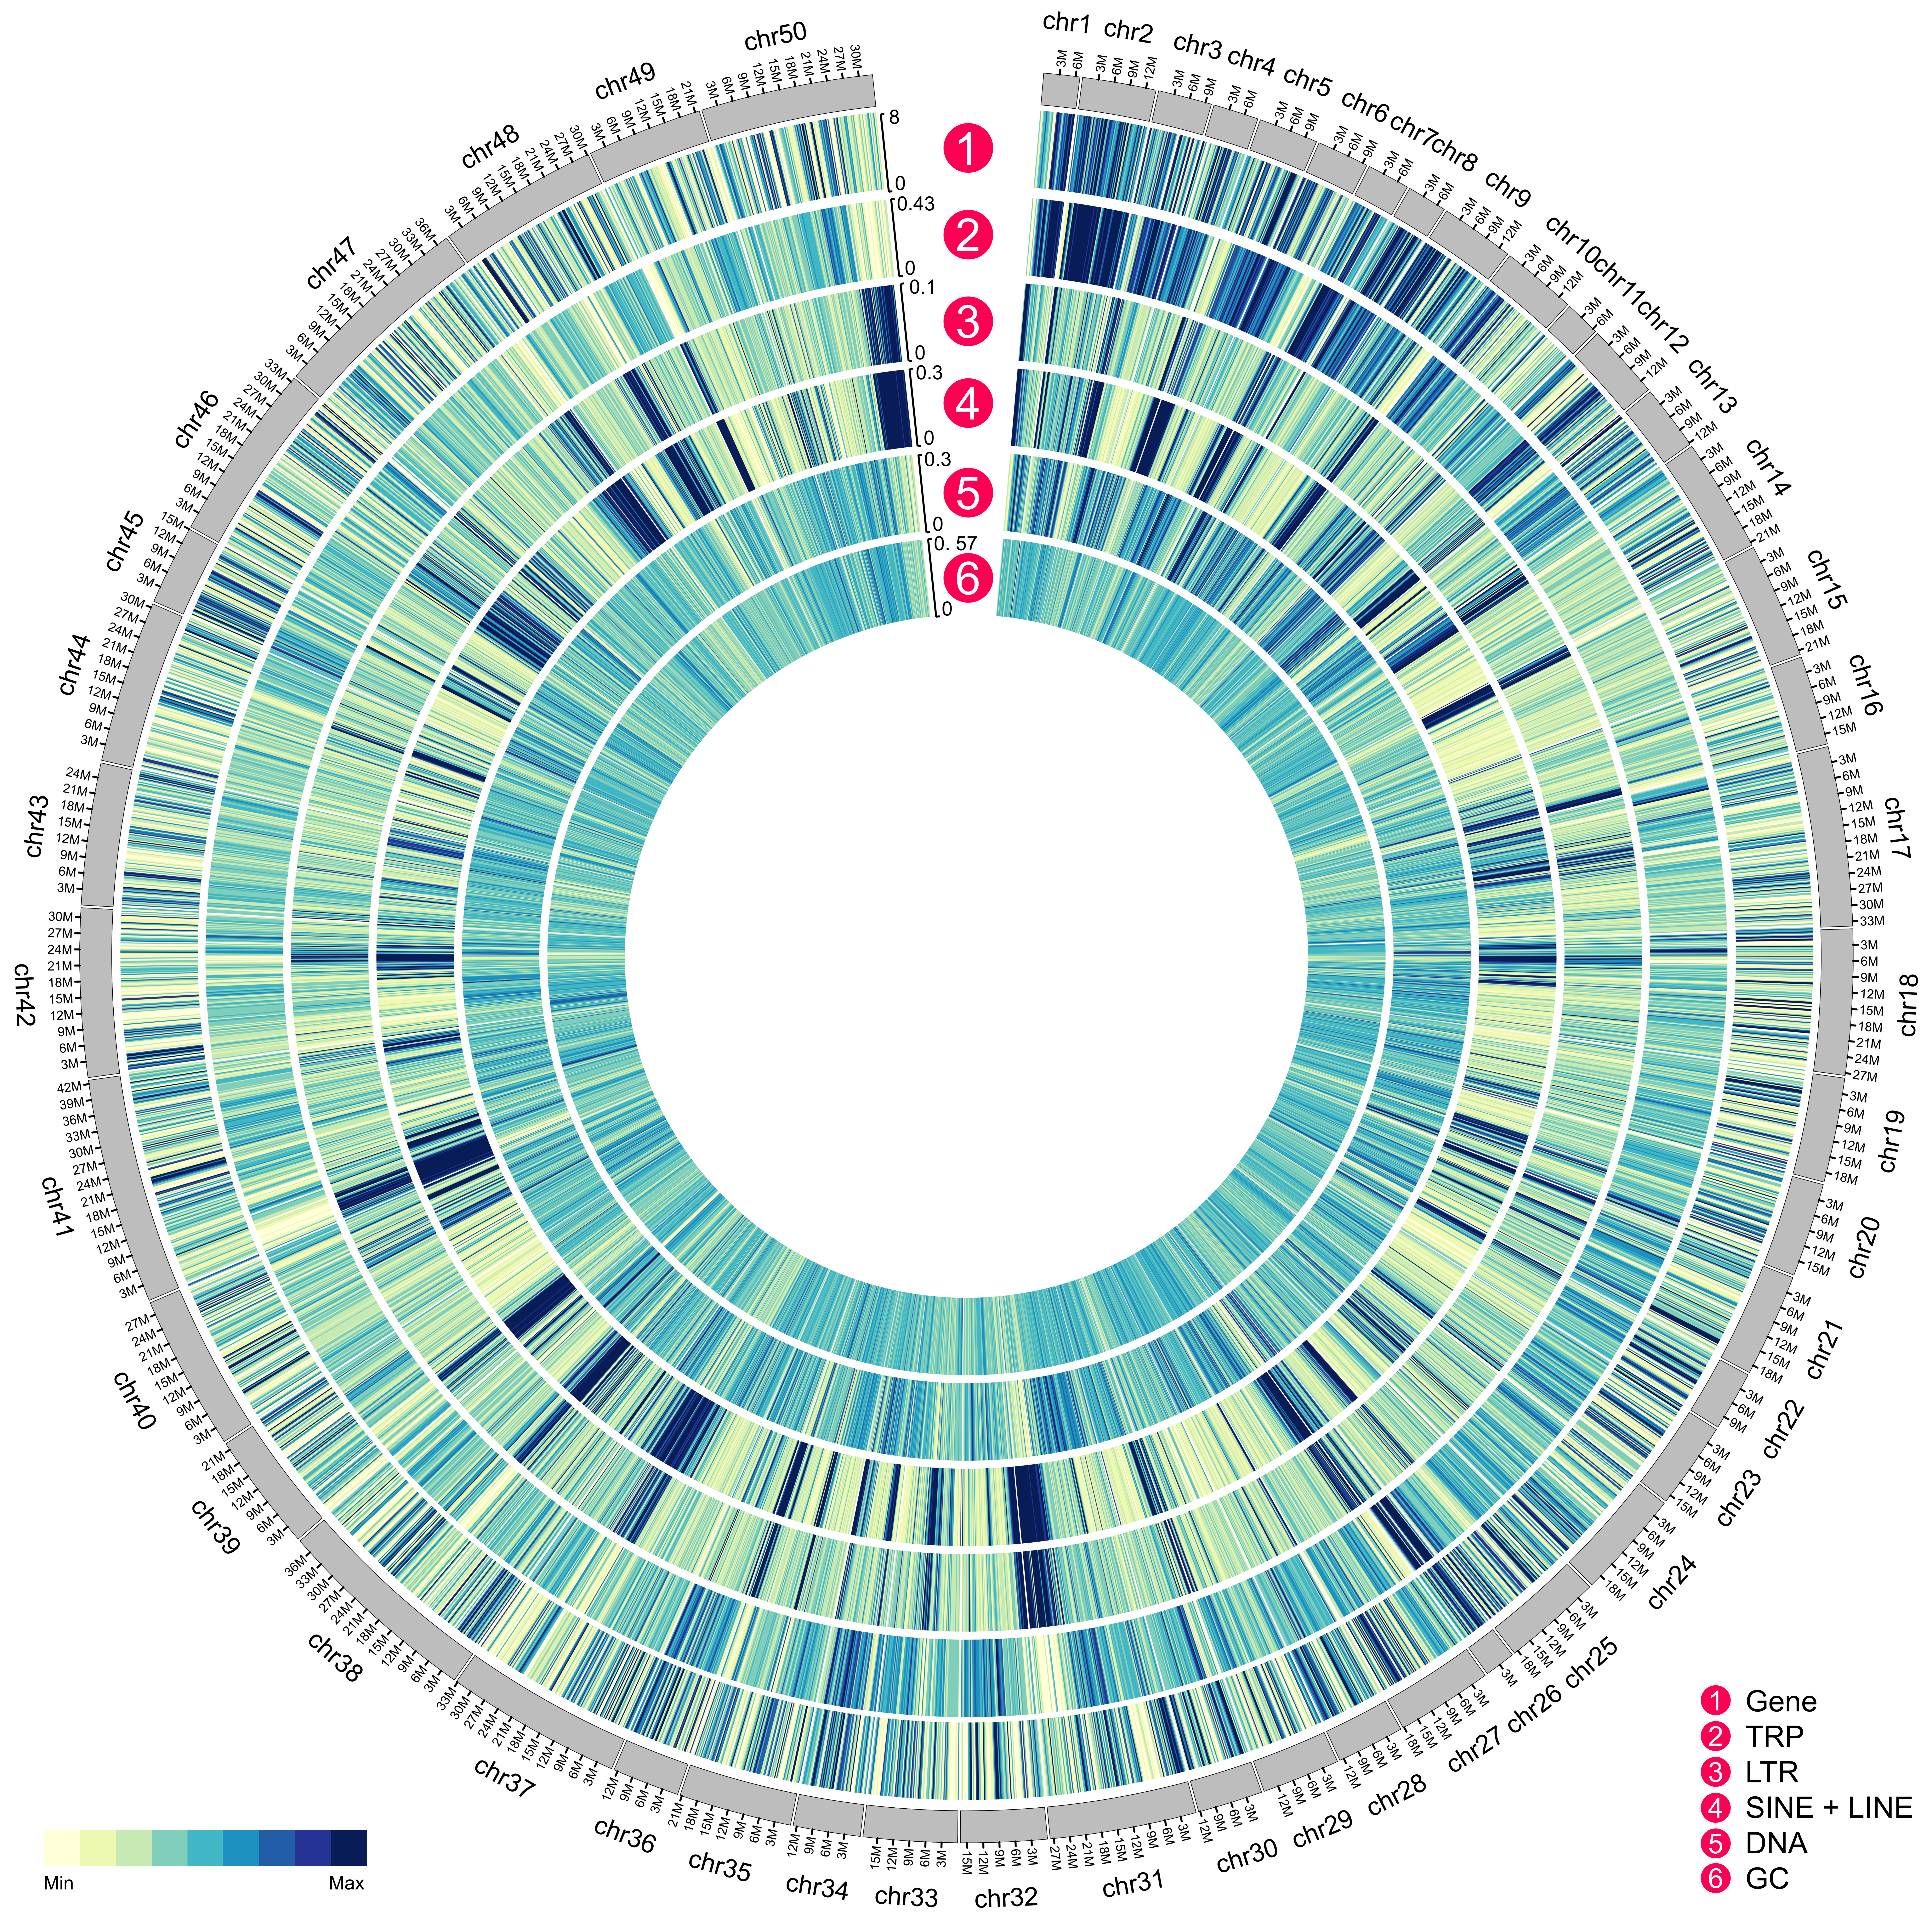

Figure 3

[Click here to access/download/Figure/Figure 3.pdf](#)

### Distribution of mRNA length

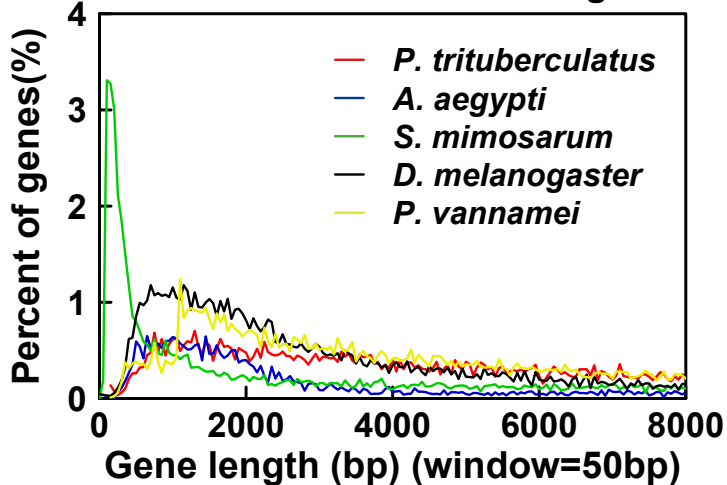

### Distribution of CDS length

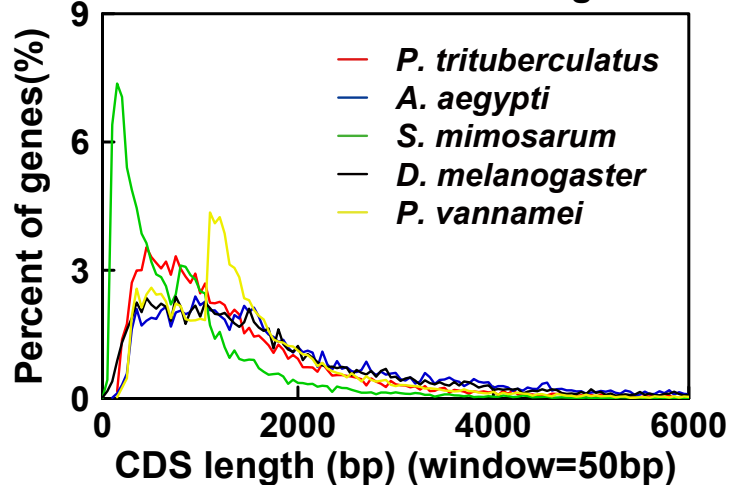

### Distribution of exon length

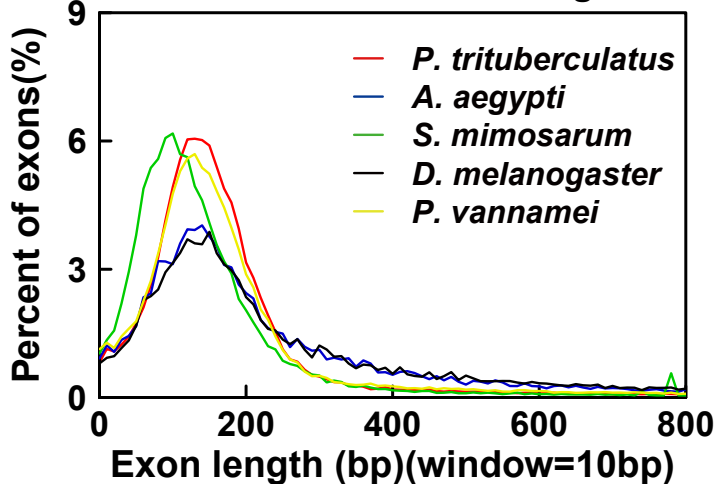

### Distribution of intron length

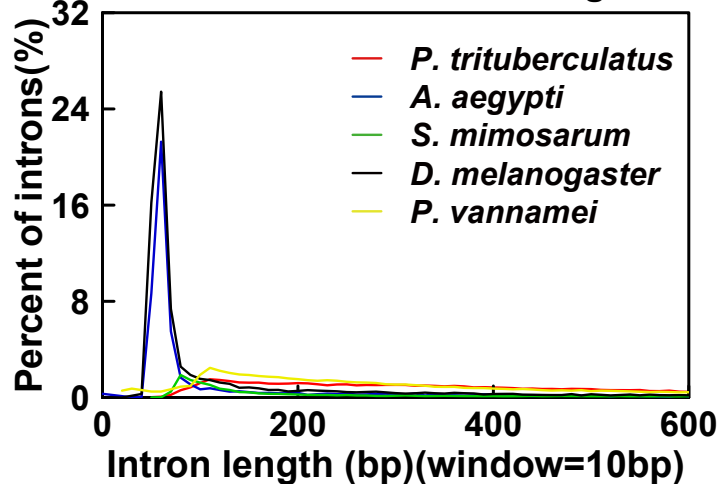

A

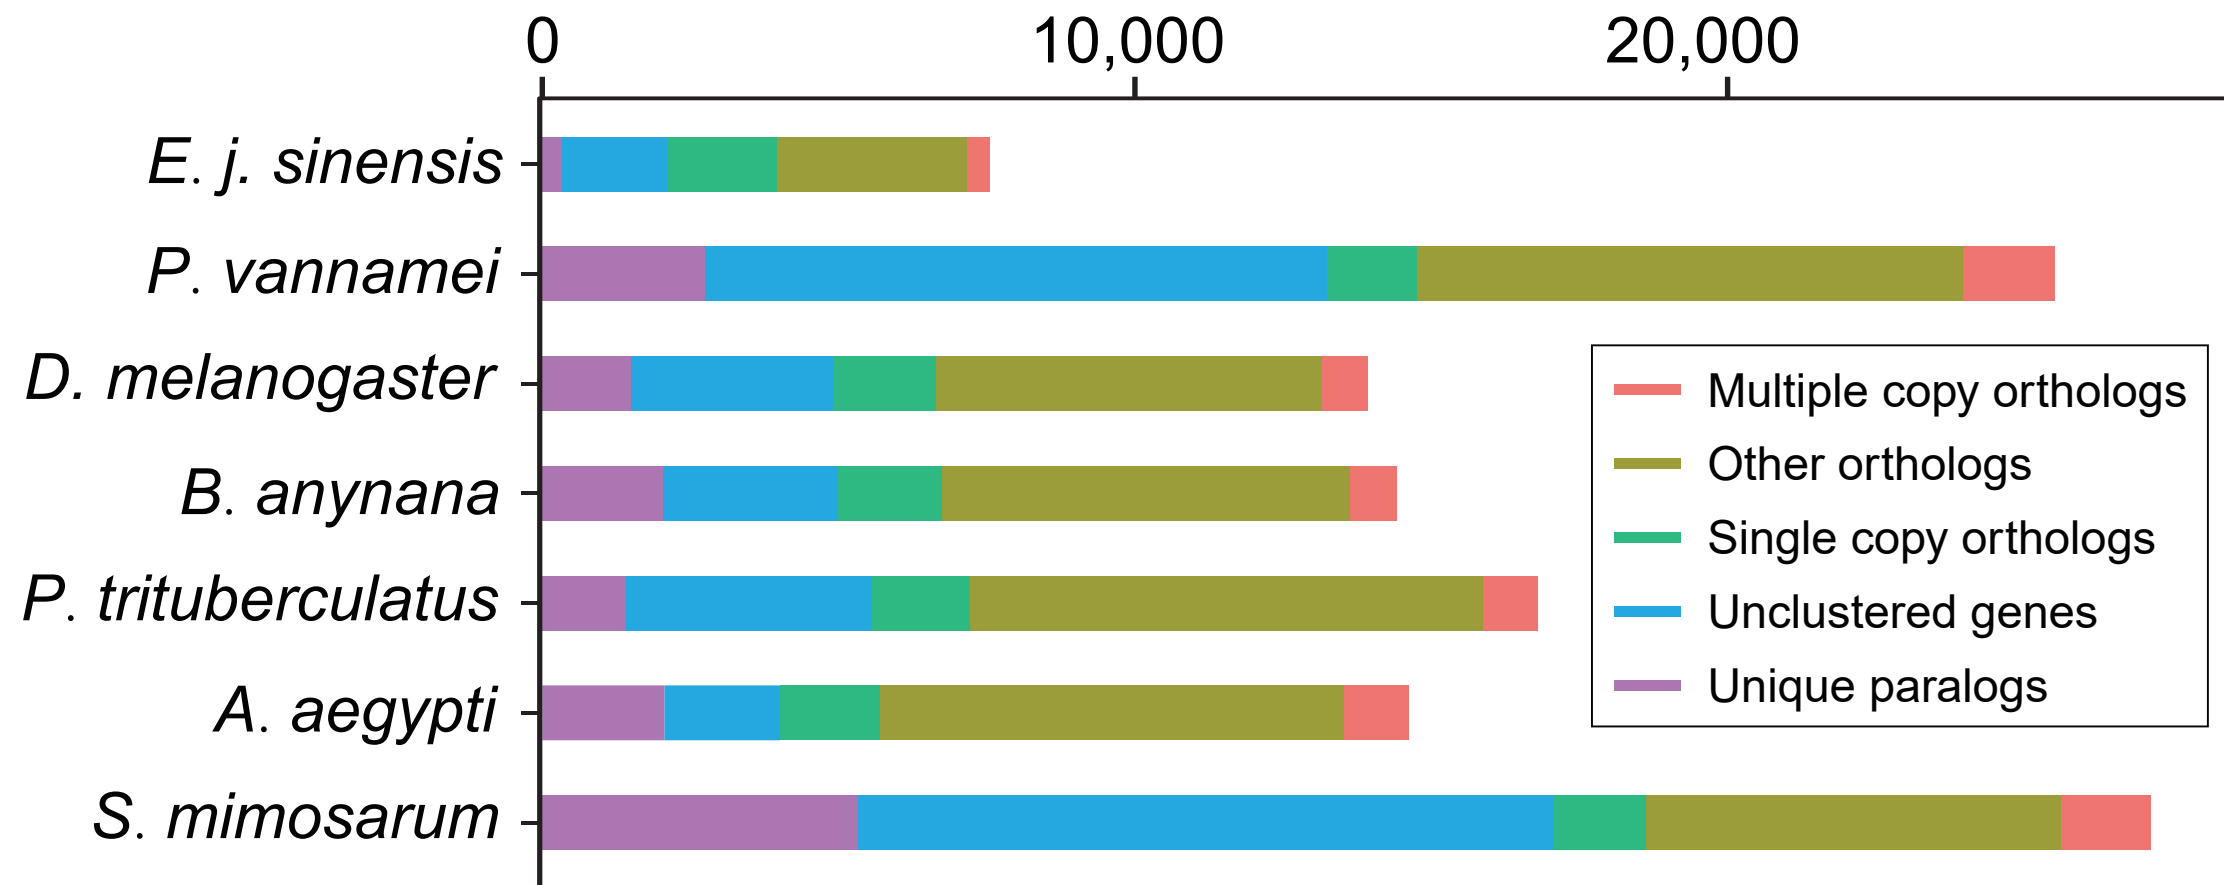

B

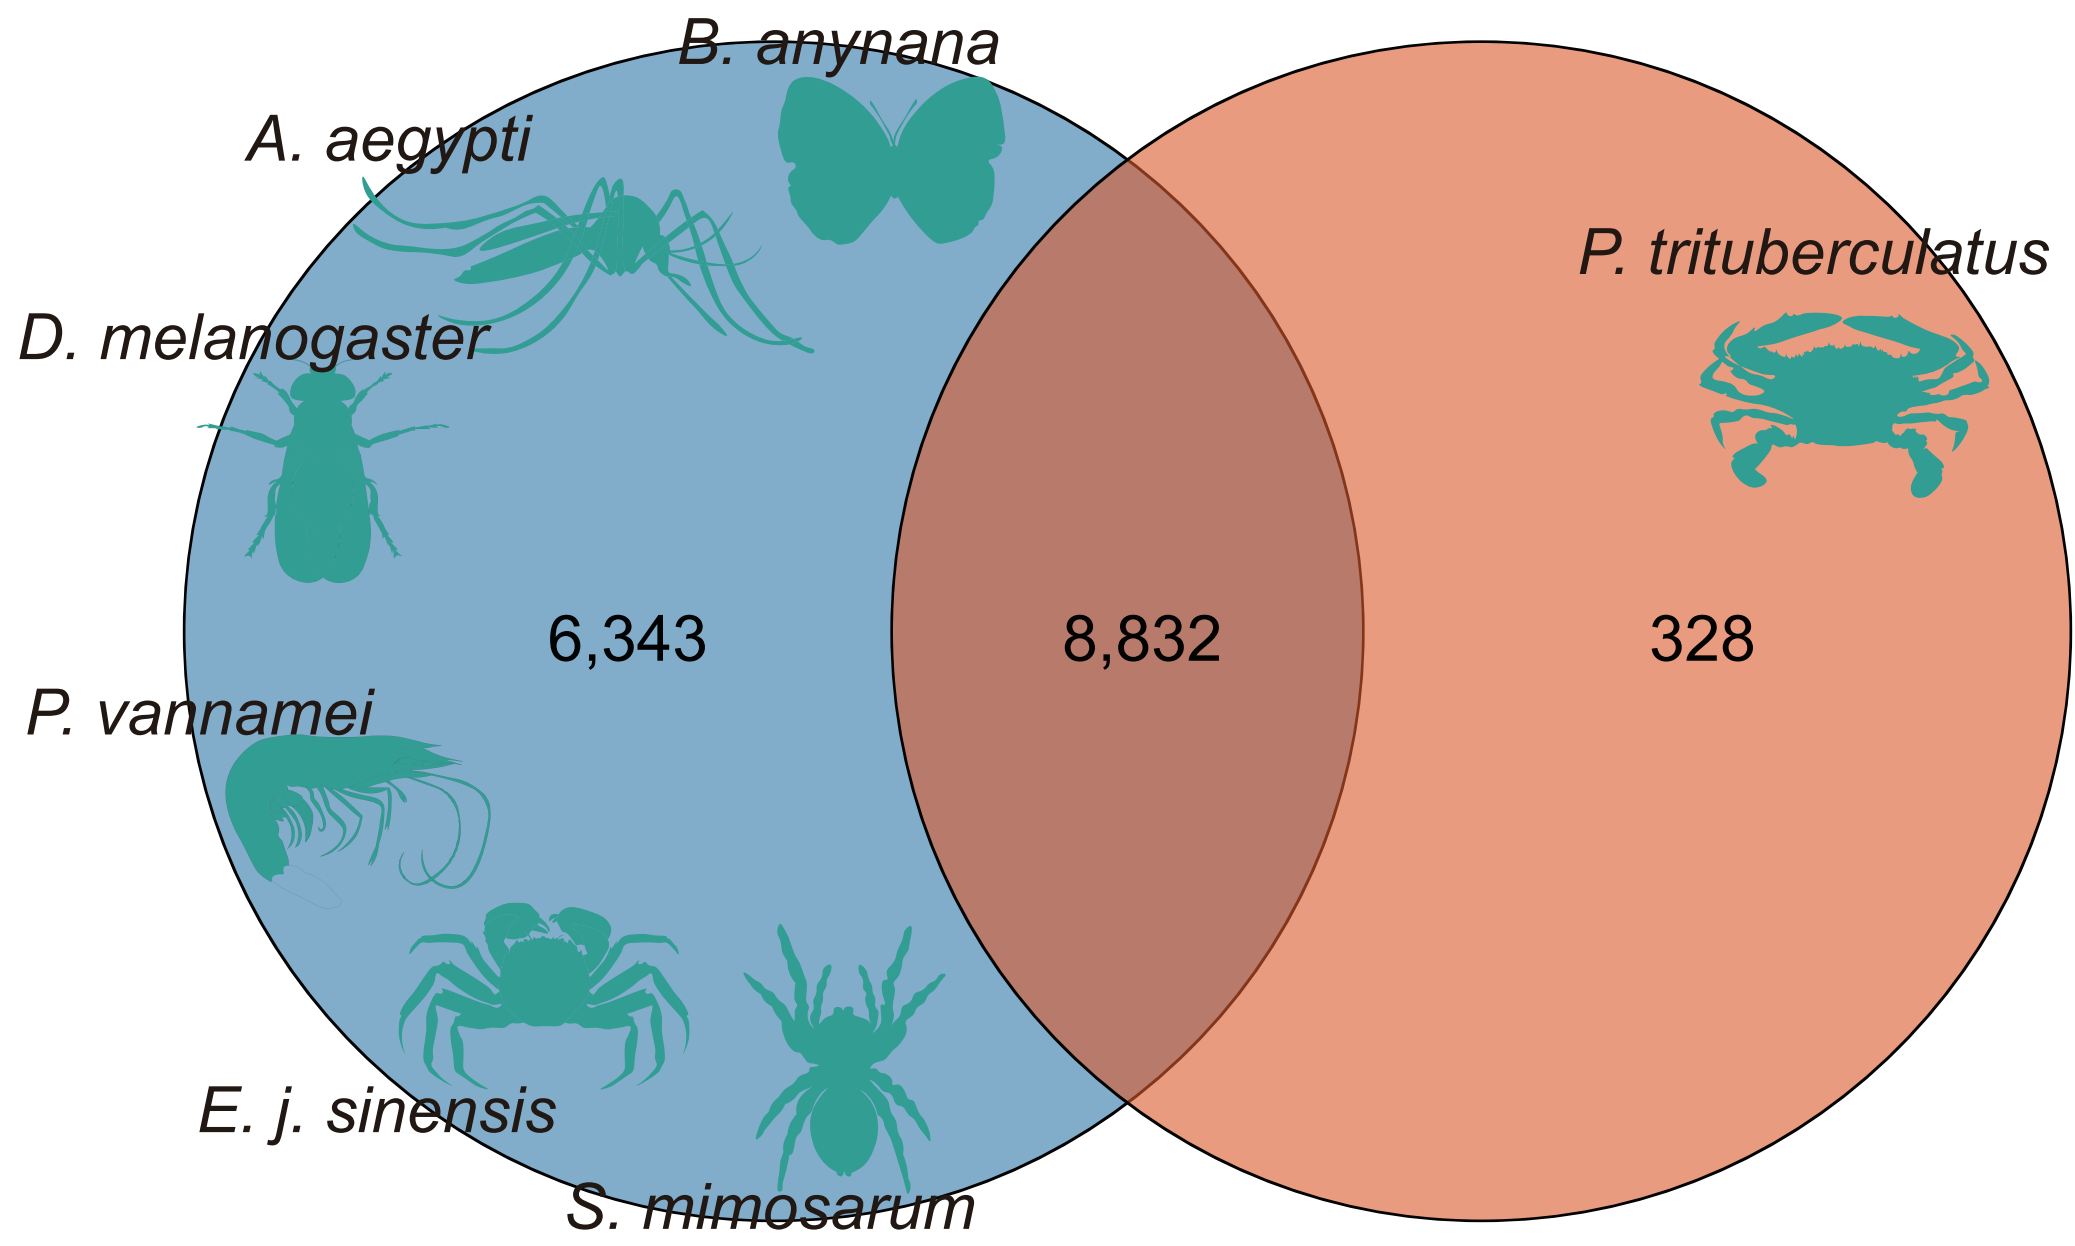



Figure 5

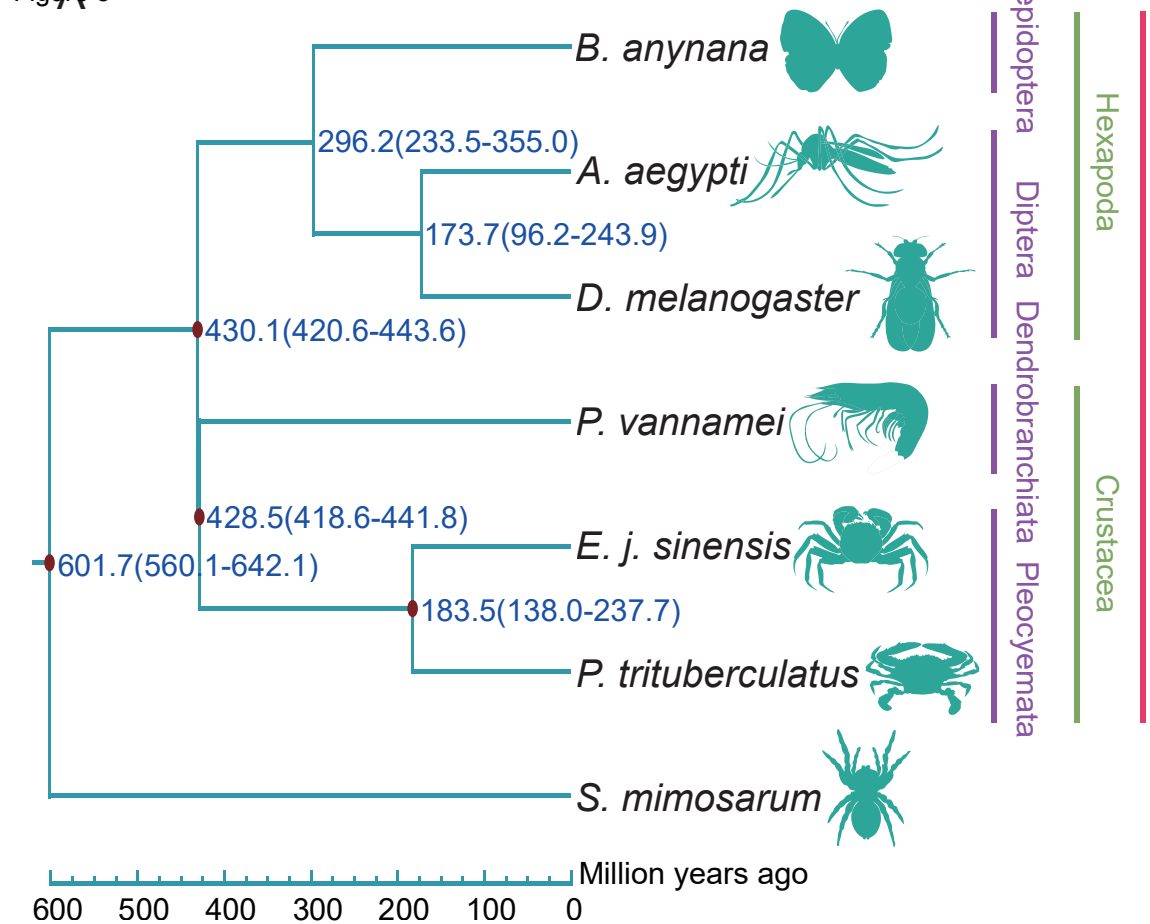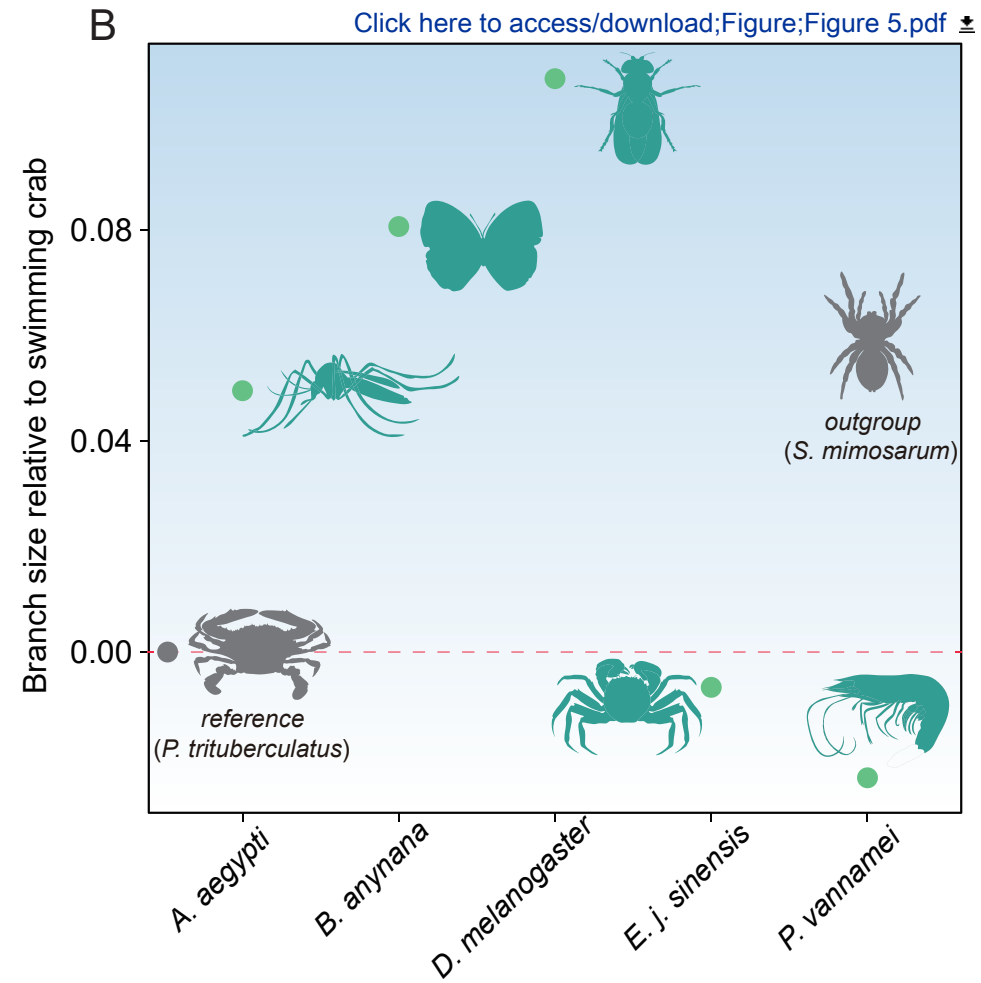

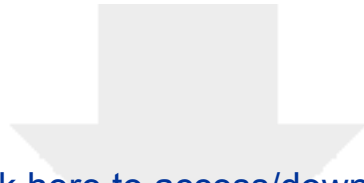

[Click here to access/download](#)

**Supplementary Material**

Supplementary tables and figures\_20191112.docx

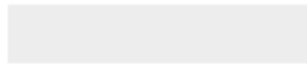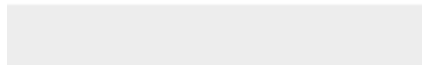

Supplement: giz161_giga-d-19-00309_revision_1.pdf [file giz161_giga-d-19-00309_revision_1.pdf]
