# Supplementary material for: Chromosome-level genome assembly reveals the unique genome evolution of the swimming crab (Portunus trituberculatus)
Source: PubMed Central journal article supplement (PMC6944217; doi:10.1093/gigascience/giz161), 2020-01-06
Supplement: giz161_giga-d-19-00309_original_submission.pdf [file giz161_giga-d-19-00309_original_submission.pdf]

## Chromosome-level genome assembly reveals adaptive evolution of the swimming crab (*Portunus trituberculatus*) --Manuscript Draft--

|                                                      |                                                                                                                                                                                                                                                                                                                                                                                                                                                                                                                                                                                                                                                                                                                                                                                                                                                                                                                                                                                                                                                                                                                                                                                                                                                                                           |                  |
|------------------------------------------------------|-------------------------------------------------------------------------------------------------------------------------------------------------------------------------------------------------------------------------------------------------------------------------------------------------------------------------------------------------------------------------------------------------------------------------------------------------------------------------------------------------------------------------------------------------------------------------------------------------------------------------------------------------------------------------------------------------------------------------------------------------------------------------------------------------------------------------------------------------------------------------------------------------------------------------------------------------------------------------------------------------------------------------------------------------------------------------------------------------------------------------------------------------------------------------------------------------------------------------------------------------------------------------------------------|------------------|
| <b>Manuscript Number:</b>                            | GIGA-D-19-00309                                                                                                                                                                                                                                                                                                                                                                                                                                                                                                                                                                                                                                                                                                                                                                                                                                                                                                                                                                                                                                                                                                                                                                                                                                                                           |                  |
| <b>Full Title:</b>                                   | Chromosome-level genome assembly reveals adaptive evolution of the swimming crab ( <i>Portunus trituberculatus</i> )                                                                                                                                                                                                                                                                                                                                                                                                                                                                                                                                                                                                                                                                                                                                                                                                                                                                                                                                                                                                                                                                                                                                                                      |                  |
| <b>Article Type:</b>                                 | Data Note                                                                                                                                                                                                                                                                                                                                                                                                                                                                                                                                                                                                                                                                                                                                                                                                                                                                                                                                                                                                                                                                                                                                                                                                                                                                                 |                  |
| <b>Funding Information:</b>                          | National Natural Science Foundation of China (31672267)                                                                                                                                                                                                                                                                                                                                                                                                                                                                                                                                                                                                                                                                                                                                                                                                                                                                                                                                                                                                                                                                                                                                                                                                                                   | Dr Boping Tang   |
|                                                      | National Natural Science Foundation of China (31640074)                                                                                                                                                                                                                                                                                                                                                                                                                                                                                                                                                                                                                                                                                                                                                                                                                                                                                                                                                                                                                                                                                                                                                                                                                                   | Mr Qiuning Liu   |
|                                                      | Jiangsu Agricultural Science and Technology Innovation Fund (CX(18)3027)                                                                                                                                                                                                                                                                                                                                                                                                                                                                                                                                                                                                                                                                                                                                                                                                                                                                                                                                                                                                                                                                                                                                                                                                                  | Dr Boping Tang   |
|                                                      | Jiangsu Agricultural Science and Technology Innovation Fund (CX(18)2027)                                                                                                                                                                                                                                                                                                                                                                                                                                                                                                                                                                                                                                                                                                                                                                                                                                                                                                                                                                                                                                                                                                                                                                                                                  | Dr Boping Tang   |
|                                                      | Natural Science Foundation of Jiangsu Province (BK20171276)                                                                                                                                                                                                                                                                                                                                                                                                                                                                                                                                                                                                                                                                                                                                                                                                                                                                                                                                                                                                                                                                                                                                                                                                                               | Dr Daizhen Zhang |
|                                                      | Natural Science Foundation of Jiangsu Province (BK20160444)                                                                                                                                                                                                                                                                                                                                                                                                                                                                                                                                                                                                                                                                                                                                                                                                                                                                                                                                                                                                                                                                                                                                                                                                                               | Mr Qiuning Liu   |
|                                                      | Qinglan Project of Jiangsu Province of China (CN) (2018M642105)                                                                                                                                                                                                                                                                                                                                                                                                                                                                                                                                                                                                                                                                                                                                                                                                                                                                                                                                                                                                                                                                                                                                                                                                                           | Dr Daizhen Zhang |
| <b>Abstract:</b>                                     | <p><b>Background:</b> The swimming crab, <i>Portunus trituberculatus</i>, is an important commercial species in China and is widely distributed in the coastal waters of Asia-Pacific countries. Despite increasing interest in swimming crab research, genomic information, including whole-genome sequencing, is lacking, with only limited transcriptome data currently available. <b>Findings:</b> Here, we assembled the first chromosome-level reference genome of <i>P. trituberculatus</i> by combining the short reads, Nanopore long reads, and Hi-C data. The genome assembly size was 1.00 Gb with a contig N50 length of 4.12 Mb. In addition, BUSCO assessment indicated that 94.7% of core eukaryotic genes were present in the genome assembly. Approximately 54.52% of the genome was identified as repetitive sequences, with a total of 16,796 annotated protein-coding genes. In addition, we anchored contigs into chromosomes and identified 50 chromosomes with a N50 length of 21.80 Mb by Hi-C technology. <b>Conclusions:</b> We anticipate that this chromosome-level assembly of the <i>P. trituberculatus</i> genome will not only promote study of basic development and evolution but also provide important resources for swimming crab reproduction.</p> |                  |
| <b>Corresponding Author:</b>                         | Yandong Ren<br>Northwestern Polytechnical University<br>Xi'an, Shaanxi CHINA                                                                                                                                                                                                                                                                                                                                                                                                                                                                                                                                                                                                                                                                                                                                                                                                                                                                                                                                                                                                                                                                                                                                                                                                              |                  |
| <b>Corresponding Author Secondary Information:</b>   |                                                                                                                                                                                                                                                                                                                                                                                                                                                                                                                                                                                                                                                                                                                                                                                                                                                                                                                                                                                                                                                                                                                                                                                                                                                                                           |                  |
| <b>Corresponding Author's Institution:</b>           | Northwestern Polytechnical University                                                                                                                                                                                                                                                                                                                                                                                                                                                                                                                                                                                                                                                                                                                                                                                                                                                                                                                                                                                                                                                                                                                                                                                                                                                     |                  |
| <b>Corresponding Author's Secondary Institution:</b> |                                                                                                                                                                                                                                                                                                                                                                                                                                                                                                                                                                                                                                                                                                                                                                                                                                                                                                                                                                                                                                                                                                                                                                                                                                                                                           |                  |
| <b>First Author:</b>                                 | Yandong Ren                                                                                                                                                                                                                                                                                                                                                                                                                                                                                                                                                                                                                                                                                                                                                                                                                                                                                                                                                                                                                                                                                                                                                                                                                                                                               |                  |
| <b>First Author Secondary Information:</b>           |                                                                                                                                                                                                                                                                                                                                                                                                                                                                                                                                                                                                                                                                                                                                                                                                                                                                                                                                                                                                                                                                                                                                                                                                                                                                                           |                  |
| <b>Order of Authors:</b>                             | Yandong Ren                                                                                                                                                                                                                                                                                                                                                                                                                                                                                                                                                                                                                                                                                                                                                                                                                                                                                                                                                                                                                                                                                                                                                                                                                                                                               |                  |

|                                                                                                                                                                                                                                                                                                                                                                                                                              |                 |
|------------------------------------------------------------------------------------------------------------------------------------------------------------------------------------------------------------------------------------------------------------------------------------------------------------------------------------------------------------------------------------------------------------------------------|-----------------|
|                                                                                                                                                                                                                                                                                                                                                                                                                              | Boping Tang     |
|                                                                                                                                                                                                                                                                                                                                                                                                                              | Daizhen Zhang   |
|                                                                                                                                                                                                                                                                                                                                                                                                                              | Haorong Li      |
|                                                                                                                                                                                                                                                                                                                                                                                                                              | Senhao Jiang    |
|                                                                                                                                                                                                                                                                                                                                                                                                                              | Fujun Xuan      |
|                                                                                                                                                                                                                                                                                                                                                                                                                              | Baoming Ge      |
|                                                                                                                                                                                                                                                                                                                                                                                                                              | Zhengfei Wang   |
|                                                                                                                                                                                                                                                                                                                                                                                                                              | Yu Liu          |
|                                                                                                                                                                                                                                                                                                                                                                                                                              | Zhongli Sha     |
|                                                                                                                                                                                                                                                                                                                                                                                                                              | Yongxu Cheng    |
|                                                                                                                                                                                                                                                                                                                                                                                                                              | Wei Jiang       |
|                                                                                                                                                                                                                                                                                                                                                                                                                              | Hui Jiang       |
|                                                                                                                                                                                                                                                                                                                                                                                                                              | Zhongkai Wang   |
|                                                                                                                                                                                                                                                                                                                                                                                                                              | Kun Wang        |
|                                                                                                                                                                                                                                                                                                                                                                                                                              | Chaofeng Li     |
|                                                                                                                                                                                                                                                                                                                                                                                                                              | Yue Sun         |
|                                                                                                                                                                                                                                                                                                                                                                                                                              | Shusheng She    |
|                                                                                                                                                                                                                                                                                                                                                                                                                              | Qiang Qiu       |
|                                                                                                                                                                                                                                                                                                                                                                                                                              | Wen Wang        |
|                                                                                                                                                                                                                                                                                                                                                                                                                              | Xinzheng Li     |
|                                                                                                                                                                                                                                                                                                                                                                                                                              | Yongxin Li      |
|                                                                                                                                                                                                                                                                                                                                                                                                                              | Qiuning Liu     |
| <b>Order of Authors Secondary Information:</b>                                                                                                                                                                                                                                                                                                                                                                               |                 |
| <b>Additional Information:</b>                                                                                                                                                                                                                                                                                                                                                                                               |                 |
| <b>Question</b>                                                                                                                                                                                                                                                                                                                                                                                                              | <b>Response</b> |
| Are you submitting this manuscript to a special series or article collection?                                                                                                                                                                                                                                                                                                                                                | No              |
| <b>Experimental design and statistics</b><br><br>Full details of the experimental design and statistical methods used should be given in the Methods section, as detailed in our <a href="#">Minimum Standards Reporting Checklist</a> . Information essential to interpreting the data presented should be made available in the figure legends.<br><br>Have you included all the information requested in your manuscript? | Yes             |
| <b>Resources</b>                                                                                                                                                                                                                                                                                                                                                                                                             | Yes             |

|                                                                                                                                                                                                                                                                                                                                                                                                                                                                                                                                                         |            |
|---------------------------------------------------------------------------------------------------------------------------------------------------------------------------------------------------------------------------------------------------------------------------------------------------------------------------------------------------------------------------------------------------------------------------------------------------------------------------------------------------------------------------------------------------------|------------|
| <p>A description of all resources used, including antibodies, cell lines, animals and software tools, with enough information to allow them to be uniquely identified, should be included in the Methods section. Authors are strongly encouraged to cite <a href="#">Research Resource Identifiers</a> (RRIDs) for antibodies, model organisms and tools, where possible.</p> <p>Have you included the information requested as detailed in our <a href="#">Minimum Standards Reporting Checklist</a>?</p>                                             |            |
| <p><b>Availability of data and materials</b></p> <p>All datasets and code on which the conclusions of the paper rely must be either included in your submission or deposited in <a href="#">publicly available repositories</a> (where available and ethically appropriate), referencing such data using a unique identifier in the references and in the “Availability of Data and Materials” section of your manuscript.</p> <p>Have you have met the above requirement as detailed in our <a href="#">Minimum Standards Reporting Checklist</a>?</p> | <p>Yes</p> |

1 **Chromosome-level genome assembly reveals adaptive evolution of the swimming crab**  
2 **(*Portunus trituberculatus*)**

3

4 Boping Tang<sup>1,\*</sup>, Daizhen Zhang<sup>1,\*</sup>, Haorong Li<sup>2,\*</sup>, Senhao Jiang<sup>1,\*</sup>, Huabin Zhang<sup>1</sup>, Fujun  
5 Xuan<sup>1</sup>, Baoming Ge<sup>1</sup>, Zhengfei Wang<sup>1</sup>, Yu Liu<sup>1</sup>, Zhongli Sha<sup>3</sup>, Yongxu Cheng<sup>5</sup>, Wei Jiang<sup>3</sup>,  
6 Hui Jiang<sup>4,6</sup>, Zhongkai Wang<sup>2</sup>, Kun Wang<sup>2</sup>, Chaofeng Li<sup>1</sup>, Yue Sun<sup>1</sup>, Shusheng She<sup>7</sup>, Qiang  
7 Qiu<sup>2</sup>, Wen Wang<sup>2</sup>, Xinzheng Li<sup>3†</sup>, Yongxin Li<sup>2†</sup>, Qiuning Liu<sup>1†</sup>, Yandong Ren<sup>2†</sup>

8

9 1. Jiangsu Key Laboratory for Bioresources of Saline Soils, Jiangsu Provincial Key  
10 Laboratory of Coastal Wetland Bioresources and Environmental Protection, Jiangsu Synthetic  
11 Innovation Center for Coastal Bio-agriculture, Yancheng Teachers University, Yancheng  
12 224002, China

13 2. Center for Ecological and Environmental Sciences, Northwestern Polytechnical University,  
14 Xi'an 710072, China

15 3. Institute of Oceanology, Chinese Academy of Sciences, Qingdao 266071, China

16 4. National Engineering Laboratory of Marine Germplasm Resources Exploration and  
17 Utilization, Zhejiang Ocean University, Zhoushan 316022, China

18 5. Key Laboratory of Freshwater Aquatic Genetic Resources, Ministry of Agriculture and  
19 Rural Affairs, Shanghai Ocean University, Shanghai 201306, China

20 6. National Engineering Research Center for Facilitated Marine Aquaculture, Zhejiang Ocean  
21 University, Zhoushan 316022, China

22 7. China Hong Kong Ecology Consultant Company, Hong Kong, China

23

24 \*These authors contributed equally to this work.

25 †Corresponding authors: Yandong Ren (renyandong90@126.com); Qiuning Liu  
26 (liuqiuning@163.com); Yongxin Li (yxli28science@sina.com); Xinzheng Li  
27 (lixzh@ms.qdio.ac.cn)

28

29

30 **Abstract**

31 **Background:** The swimming crab, *Portunus trituberculatus*, is an important commercial  
32 species in China and is widely distributed in the coastal waters of Asia-Pacific countries.  
33 Despite increasing interest in swimming crab research, genomic information, including  
34 whole-genome sequencing, is lacking, with only limited transcriptome data currently  
35 available. **Findings:** Here, we assembled the first chromosome-level reference genome of *P.*  
36 *trituberculatus* by combining the short reads, Nanopore long reads, and Hi-C data. The  
37 genome assembly size was 1.00 Gb with a contig N50 length of 4.12 Mb. In addition,  
38 BUSCO assessment indicated that 94.7% of core eukaryotic genes were present in the  
39 genome assembly. Approximately 54.52% of the genome was identified as repetitive  
40 sequences, with a total of 16,796 annotated protein-coding genes. In addition, we anchored  
41 contigs into chromosomes and identified 50 chromosomes with a N50 length of 21.80 Mb by  
42 Hi-C technology. **Conclusions:** We anticipate that this chromosome-level assembly of the *P.*  
43 *trituberculatus* genome will not only promote study of basic development and evolution but  
44 also provide important resources for swimming crab reproduction.

45

46 **Keywords:** *Portunus trituberculatus*; genome assembly; crab; chromosome; evolution

47

48 **Introduction**

49 The swimming crab, *Portunus trituberculatus* (NCBI: txid210409), belonging to Brachyura,  
50 Portunidae, Portunus, is named for its shuttle-shaped head breastplate and three verrucous  
51 bumps on the back of the stomach and heart regions [1, 2]. The chelipeds of swimming crabs  
52 are well developed for feeding and attacking, with the first three pairs and last pair used for  
53 crawling and swimming, respectively [3, 4]. Male and female crabs are distinguished by their  
54 type of abdomen, with the male having a triangular abdomen and the female having an almost  
55 circular one [5]. Due to their lack of drilling ability, swimming crabs often live in soft mud or  
56 sand [6] or in water grass near the shore, and also show a certain level of phototaxis, spending  
57 time on the sea floor during the day and foraging at night [5]. Swimming crabs are also  
58 omnivorous, feeding on shellfish, small fish, shrimp, algae, and decomposing animal and

59 plant carcasses [7].  
60 The swimming crab is widely distributed in the coastal waters of Korea, Japan, China, and  
61 Southeast Asia and is one of the most valuable marine crustaceans in Asia  
62 ([http://species-identification.org/species.php?species\\_group=crabs\\_of\\_japan&menuentry=soo](http://species-identification.org/species.php?species_group=crabs_of_japan&menuentry=soorten&id=1106&tab=beschrijving)  
63 [rten&id=1106&tab=beschrijving](http://species-identification.org/species.php?species_group=crabs_of_japan&menuentry=soorten&id=1106&tab=beschrijving)). It is widely found in Chinese coastal waters of the Bohai  
64 Sea, Yellow Sea, East China Sea, and South China Sea and is an important commercially  
65 cultured species [8]. Swimming crabs are considered highly nutritious, especially in regard to  
66 crab cream, and are very popular in China [9, 10]. As a result, the crab has been heavily  
67 overfished, resulting in substantial declines in its natural population [11] and initiation of  
68 artificial breeding [12, 13]. With continued research on the crab, it has become clear that  
69 morphological, physiological, but the genetic changes are poorly understood. At present,  
70 genomic research on the swimming crab has only been conducted at the transcriptome level  
71 [14-16], with the whole genome not yet described.

72 In the present study, we constructed a chromosome-level genome assembly of *P.*  
73 *trituberculatus* by combining short reads, Nanopore long reads, and Hi-C sequencing data.  
74 This chromosome-level genome will not only promote study on development and evolution,  
75 but also provide important resources for reproductive studies of *P. trituberculatus* and other  
76 crab species.

77

### 78 **Sampling, library construction, and sequencing**

79 A male swimming crab was collected in Bohai Bay, Hebei Province, China, for sequencing  
80 (Figure 1). To obtain sufficient high-quality DNA for the Oxford Nanopore (Oxford, UK) and  
81 BGISEQ-500 platforms (BGI, China), the swimming crab was rinsed five times with clean  
82 water and dissected immediately. Fresh muscle tissue was collected and snap-frozen in liquid  
83 nitrogen. The samples were then used to extract DNA with a Qiagen Blood & Cell Culture  
84 DNA Mini Kit and prepared for Nanopore, BGISEQ-500, and Hi-C sequencing. Muscle RNA  
85 was also extracted using TRIzol (Invitrogen) according to the manufacturer's instructions. To  
86 obtain an overview of the transcriptome, polyadenylated RNA was chosen by oligo (dT)  
87 purification and reverse-transcribed to cDNA and sequenced using the BGISEQ-500 platform.

88 Extracted DNA was sequenced using both the BGISEQ and Oxford Nanopore platforms. The  
89 short reads generated from the BGISEQ platform were used for estimation of genome size  
90 and error correction of the assembled genome, and the Nanopore long reads were used for  
91 genome assembly. To this end, one library with insertion lengths of ~300 bp was sequenced  
92 on the BGISEQ-500 platform, and another library with an average length of 20 kb was  
93 constructed using the Oxford Nanopore platform according to the manufacturers' protocols.

94

#### 95 **Data filtering**

96 Three different sources of reads were used to achieve the high-quality genome assembly, i.e.,  
97 Nanopore long reads, short reads, and Hi-C reads. Thus, we used different methods for  
98 filtering. For the Nanopore long reads, any reads less than 1 kb or with a mean quality value  
99 of  $< 7$  were removed. For the short reads, any reads with more than 10% unknown reads or  
100 low-quality bases more than 50% along with its paired-end read were removed. All adaptor  
101 sequences and duplicated reads produced by polymerase chain reaction (PCR) were removed.  
102 The low-quality Hi-C reads were filtered using HiC-Pro v2.10.0 [17].

103

#### 104 **Genome characteristic estimation**

105 All filtered BGISEQ short reads were used for estimation of genome size and other  
106 characteristics. In addition, 17-mer was chosen for k-mer analysis and the 17-mer depth  
107 frequency distribution was calculated using the k-mer method. Genome size was estimated as:  
108  $\text{Genome size} = \text{TKN}_{17\text{-mer}} / \text{PKFD}_{17\text{-mer}}$ , where  $\text{TKN}_{17\text{-mer}}$  is the total k-mer number and  
109  $\text{PKFD}_{17\text{-mer}}$  is the peak k-mer frequency depth of 17-mer. The estimated genome size was  
110 used to determine subsequent genome assembly results.

111

#### 112 **Genome assembly**

113 To improve the quality of the genome and reduce the error ratio, self-error correction of all  
114 Nanopore long reads was performed using NextDenovo software  
115 (<https://github.com/Nextomics/NextDenovo>). The error-corrected Nanopore long reads were  
116 then used to assemble the raw genome via contig construction with WTDBG software [18]

117 and parameters: -p 0 -k 15 -AS 2 -E 1 -s 0.05 -L 5000. The assembled genomic sequences  
118 were further polished by Racon v1.2.1 [19] with four iterations using the error-corrected  
119 Nanopore long reads. After this, all filtered BGISEQ short reads were polished by Pilon v1.21  
120 [20] at the single-base level. After completion of the error-correction steps, the Hi-C data  
121 were used to obtain a chromosome-level genome assembly. All Hi-C sequencing data were  
122 first filtered by Hic-Pro v2.10.0 [17] and then mapped to the polished swimming crab genome  
123 to improve the connection integrity of the contigs. Finally, 3D *de novo* assembly software  
124 (v180419) [21] with default parameters was used to determine contig location and direction.

125

### 126 **Genome assembly evaluation**

127 Three different strategies were used to evaluate the completeness and accuracy of the  
128 assembled genome. First, the quality of the assembled genome and gene completeness were  
129 assessed using BUSCO [22] with the core gene sets of the eukaryote and metazoan databases,  
130 respectively. Second, all filtered short reads generated by BGISEQ were mapped to the  
131 assembled genome using BWA-MEM v0.7.12 [23] to detect genome integrity. Third,  
132 transcripts were mapped to the assembled genome using BLAT software [24].

133

### 134 **Repetitive element annotation**

135 Tandem repeats and transposable elements (TEs) were also annotated in the  
136 chromosome-level genome. Tandem repeats were annotated using Tandem Repeat Finder  
137 v4.04 [25] with default parameters. The TEs were annotated at the protein level using  
138 RepeatProteinMask (RM-BLASTX) to search the protein database and at the DNA level  
139 using RepeatMasker (open-4.0.7) [26] to search the *de novo* libraries and rebase. The *de*  
140 *novo*-repeat libraries were constructed using RepeatModeler  
141 (<http://www.repeatmasker.org/RepeatModeler/>), with consensus sequences used for *de novo*  
142 library construction.

143

### 144 **Gene structure prediction and function annotation**

145 After repetitive element annotation, the repeat-masked genome was used for gene set



146 annotation with three different methods, i.e., *de novo* prediction, RNA-seq-based annotation,  
147 and homology-based annotation. We first assembled the RNA-seq reads into transcripts using  
148 Bridger r2014-12-01 [27]. The assembled genome and transcripts were then used for  
149 Augustus training to obtain an accurate Augustus annotation species model. Augustus v2.5.5  
150 [28] was used for *de novo* prediction of coding genes with the previous training results.  
151 Second, proteins of *Bicyclus anynana* (GCF\_900239965.1) [29], *Bombus terrestris*  
152 (GCF\_000214255.1) [30], *Drosophila melanogaster* (GCA\_000001215.4) [31], *Mus*  
153 *musculus* (GCF\_000001635.26) [32], *Stegodyphus mimosarum* (GCA\_000611955.2),  
154 *Penaeus vannamei* (GCA\_003789085.1), *Mesobuthus martensii* (downloaded from:  
155 <http://lifecenter.sgst.cn/main/en/scorpion.jsp>.) [33], *Eriochair japonica sinensis* (i.e.,  
156 *Eriochair sinensis*) (GigaDB:100186) [34-39], and *Tachypleus tridentatus*  
157 (GCA\_004102145.1) [40] were downloaded from the NCBI, GigaDB, or their own databases.  
158 The longest transcript of each gene was selected for further annotation and phylogenetic  
159 analysis. All filtered genes were searched with an e-value cutoff of 1e-5, with the *blast* results  
160 then formatted and prepared for Genewise [41] prediction of the gene structure of the  
161 swimming crab genome. Third, for the RNA-seq-based method, all assembled transcripts  
162 were aligned against the genome using BLAT [24] (identity >90% and coverage >90%), with  
163 PASA used to filter overlaps to link the spliced alignments. Finally, EvidenceModeler (EVM)  
164 v1.1.1 was used to integrate the above data into an EVM-derived gene set [42].  
165 Five different public protein databases were used for gene functional annotation, with  
166 InterProScan v4.8 [43] used to screen proteins against the five databases (Pfam, release 27.0,  
167 PRINTS, release 42.0, PROSITE, release 20.97, ProDom, 2006.1, and SMART, release 6.2)  
168 to determine the number of InterPro and GO predicted protein-coding genes. In addition, the  
169 Kyoto Encyclopedia of Genes and Genomes, UniProt/SwissProt, and UniProt/TrEMBL  
170 databases were also used for functional annotation with BLAST v2.3.0 [44].

171

## 172 **Identification of orthologous genes**

173 The annotated genes in the swimming crab and six other species, including *Aedes aegypti*  
174 (GCF\_002204515.2), *B.anynana*, *D. melanogaster*, *S. mimosarum*, *P.vannamei*, and *E. j.*

175 *sinensis*, were used for orthologous gene identification with OrthoMCL v2.0.9 [45]. The  
176 identified genes were then used to run reciprocal alignment and pairwise relationship analysis.  
177 The reciprocal best similarity pairs in different species were considered as putative  
178 orthologous genes and reciprocal better similarity pairs in one species were considered as  
179 paralogous genes. The 1:1:1:1:1:1 single-copy genes in the seven species were also  
180 identified for further phylogenetic and divergence time estimation analysis.

181

### 182 **Phylogenetic analysis and divergence time estimation**

183 Using the single-copy genes of the seven species (*P. trituberculatus*, *A. aegypti*, *B. anynana*,  
184 *D. melanogaster*, *S. mimosarum*, *P. vannamei*, and *E. j. sinensis*), we connected the genes in  
185 each species into one super-gene for phylogenetic tree building. Maximum likelihood-based  
186 phylogenetic analysis was conducted using RAxML v8.2.10 [46] with default parameters. The  
187 MCMCTREE program in the PAML package v4.8 [47] was then used to calculate divergence  
188 time, with all fossil records downloaded from the TIMETREE website  
189 (<http://www.timetree.org>) for calibration.

190

### 191 **Relative evolution rate**

192 The relative evolution rate of species was analyzed with LINTRE software [48] using the *tpcv*  
193 model and *S. mimosarum* as an outgroup. We then evaluated the relative evolution rate  
194 between the swimming crab and other related species.

195

### 196 **Gene family expansion and contraction**

197 Using the divergence time results calculated by MCMCTREE and the gene pairwise  
198 relationships calculated by OrthoMCL [45], we determined gene family expansion and  
199 contraction for each node using CAFÉ v3.1 [49]. The expansion and contraction genes of the  
200 swimming crab were extracted for GO/KEGG enrichment analysis [50, 51].

201

## 202 **Results**

### 203 **Chromosome level genome assembly**

204 To obtain a high-quality chromosome-level swimming crab genome, we extracted  
205 high-quality DNA from the muscle tissue and constructed libraries for genome sequencing. To  
206 estimate the genome characteristics of the swimming crab, we generated 205.40 Gb of  
207 BGISEQ data (Additional File: Table S1), with 17-mer analysis indicating a genome size of  
208 ~918.52Mb (Additional File: Figure S1). In total, we generated 54.97 Gb (54.75-fold  
209 coverage) of Nanopore long read data with N50 over 20kb (Additional File: Table S2). The  
210 Nanopore long reads were assembled into contigs using WTDBG software [18] (genome size:  
211 1.00 Gb; N50: 4.12 Mb) (Table 1). To further improve genome accuracy, we aligned all  
212 corrected Nanopore long reads to the assembled genome and conducted error-correction using  
213 Racon [19] with four iterations. The genome was subsequently corrected using all filtered  
214 BGISEQ clean reads via Pilon [20] with two iterations. We then constructed the  
215 chromosome-level genome with 95.95 Gb of Hi-C sequencing data (Additional File: Table S3)  
216 by 3D *de novo* assembly [21]. Finally, we obtained 50 chromosomes and a mounting rate of  
217 97.80% (Figure 2; Additional File: Table S4), which is the first chromosome-level crab  
218 genome with N50 of 21.79 Mb (Table 1). The high mounting rate suggested successful  
219 assembly of the swimming crab genome at the chromosome level.

220

### 221 **Genome quality evaluation**

222 We next assessed the completeness of the swimming crab genome by BUSCO [22] and  
223 identified 94.7% Eukaryota and 92.9% Metazoa conserved core genes in the genome (Table  
224 2). We checked the mapping rates of the BGISEQ short reads to our genome and found that  
225 95.85% of reads were properly pair-mapped to the genome (Additional File: Table S5). We  
226 then *de novo* assembled the transcripts using the RNA-seq data (Additional File: Table S6)  
227 with Bridger software [27] and a N50 length of 2,124 bp (Additional File: Table S7). After  
228 transcript mapping, we found that 97.80% of the transcripts could be mapped to the  
229 swimming crab genome (Additional File: Table S8). We also analyzed the genome quality of  
230 previously published high-quality genomes from closely related species and determined that  
231 the quality of the assembled chromosome-level swimming crab genome was markedly higher  
232 or comparable with that of other species (Additional File: Table S9). In summary, these results

233 indicated that we acquired a high-quality swimming crab genome. To investigate genome  
234 characteristics, such as GC content, we analyzed the GC distribution in the genome with a  
235 slide-window method. The peak value of GC content was ~41%, which agrees with the  
236 average GC content in the swimming crab genome. We also found that the GC content in the  
237 swimming crab was closer to that of mouse than of shrimp (Additional File: Figure S2).

238

### 239 **Genome annotation**

240 The repetitive sequences of the swimming crab genome were identified through four different  
241 methods, resulting in 547.39 Mb of repeated sequences and accounting for 54.52% of the  
242 assembled genome (Additional File: Table S10). Among the repeated sequences, 19.28%  
243 (~193.56 Mb) were tandem repeats and 52.29% (~525.49 Mb) were TEs (Additional File:  
244 Table S10; Table 3). The TEs could be further divided into four main types, including 0.014%  
245 (~142.88kb) of short interspersed elements (SINE), 15.23% (~153.03 Mb) of long  
246 interspersed elements (LINE), 14.90% (~149.71 Mb) of DNA elements, and 4.50% (~45.19  
247 Mb) of long terminal repeats (LTR) (Table 3).

248 After masking the repeated sequences, we annotated the protein-coding genes using *de novo*  
249 prediction, homology-based prediction, and transcript-based prediction. We merged the  
250 results and obtained 16,791 protein-coding genes. We checked the quality of the annotated  
251 genes by comparing with several closely related species. Results showed that the mRNA,  
252 CDS, exon, intron length distributions of the swimming crab were similar to those of the  
253 closely related species, suggesting that the swimming crab annotation results were dependable  
254 (Figure 3).

255 We also performed functional annotation of the 16,791 genes with InterPro, GO, KEGG,  
256 SwissProt, and TrEMBL. The highest annotation rate (74.77%) was found for SwissProt, in  
257 which 12,558 genes were annotated. In total, 16,053 genes (~95.58%) were annotated,  
258 indicating that most genes could be found in the public protein databases (Table 4). Thus,  
259 taken together, we acquired a high-quality protein-coding gene set for the swimming crab.

260

### 261 **Orthologous identification and gene family analysis**

262 For comparative genomics analysis of the swimming crab, we analyzed the orthologous gene  
263 relationships among several species, including *A. aegypti*, *B. anynana*, *D. melanogaster*, *S.*  
264 *mimosarum*, *P. vannamei*, and *E. j. sinensis* using OrthoMCL. In total, 15,503 gene families  
265 were clustered in the seven species and 1,018 one-to-one single-copy genes were identified  
266 (Figure 4A). Because the swimming crab has several unique characteristics, we employed  
267 gene family analysis and found 8,832 gene families shared among the seven species, with 328  
268 gene families unique to the swimming crab (Figure 4B). We then employed functional  
269 analysis and identified 34 enriched KEGG terms. Among them, the Notch signaling pathway  
270 ( $Q$ -value = 0.003579101), vascular smooth muscle contraction ( $Q$ -value = 0.025737431), and  
271 retinol metabolism ( $Q$ -value = 0.033319138) were significantly enriched (Additional File:  
272 Table S11). As these all play important roles in development and physiological processes,  
273 genes in these families may have key functions in the swimming crab.

274

#### 275 **Phylogenetic relationships and divergence time**

276 Although the phylogenetic relationships of the swimming crab and closely related species  
277 have been analyzed in previous studies, most used few nuclear and mitochondrial genes. To  
278 determine the evolutionary relationship of the swimming crab, we analyzed all single-copy  
279 genes using RAxML software [46], with the spider used as the outgroup species. Results  
280 showed that the swimming crab has a close relationship with the Chinese mitten crab and  
281 shrimp (Figure 5A). The seven species of pancrustaceans—*P. trituberculatus*, *A. aegypti*, *B.*  
282 *anynana*, *D. melanogaster*, *S. mimosarum*, *P. vannamei*, and *E. j. sinensis*—formed two clades:  
283 i.e., Hexapoda and Crustacea. The Hexapoda group consisted of all lepidopteran and  
284 dipterous insects, whereas the second clade comprised all other crustaceans, with *P.*  
285 *trituberculatus* and *E. j. sinensis* forming a Pleocyemata clade, followed by Dendrobranchiata  
286 shrimp (*P. vannamei*). In addition, Hexapoda and Crustacea were both found to be  
287 monophyletic (Figure 5A). To determine divergence time, we employed MCMCTREE  
288 analysis in the PAML package [47] and found that the Chinese mitten crab and swimming  
289 crab diverged ~183.5 million years ago (Mya), and diverged from shrimp ~428.5 Mya (Figure  
290 5A).

291

### 292 **Relative evolution rate**

293 Species in different environments can experience different survival pressures. As such, we  
294 conducted relative evolution rate analysis in LINTRE [48], with spider as the outgroup  
295 species and swimming crab as the reference species. Results showed that the shrimp had the  
296 slowest evolution rate among the seven species, whereas the fruit fly and butterfly exhibited  
297 relatively fast evolution rates, suggesting greater survival pressures on these two species  
298 (Figure 5B; Additional File: Table S12). Interestingly, the slowest evolution rates were found  
299 among the Malacostraca (Figure 5B; Additional File: Table S12), suggesting that these  
300 species experience relatively low survival pressure in their habitats.

301

### 302 **Gene family expansion and contraction**

303 We performed gene family expansion and contraction analysis of the seven species using  
304 CAFÉ v4.0, and identified 148 and 25 expanded and contracted gene families ( $P < 0.05$ ) in the  
305 swimming crab, respectively. We then employed KEGG functional enrichment analysis of the  
306 expanded gene families and found that the HIF-1 signaling pathway ( $Q$ -value = 0.000109025),  
307 focal adhesion ( $Q$ -value = 0.000135977), Hippo signaling pathway ( $Q$ -value = 0.000184649),  
308 and insulin signaling pathway ( $Q$ -value = 0.000357592) were enriched (Additional File: Table  
309 S13). These biological processes are related to early development, hypoxia adaptation, and  
310 other key processes, suggesting important functions of these genes in the development and  
311 environmental adaptation of the unique body plan of the swimming crab.

312

### 313 **Conclusions**

314 Based on BGISEQ, Nanopore, and Hi-C sequencing data, we assembled a chromosome-level  
315 high-quality genome of the swimming crab. Evaluation results indicated that the genome  
316 quality of swimming crab was comparable with that of most high-quality model species. We  
317 also successfully obtained 16,791 high-quality protein-coding genes by integrating three  
318 different methods. The genome and annotation data will help researchers better understand  
319 the evolution of crabs and improve their economic value. The phylogenetic results indicated

320 that the swimming crab is closely related to the Chinese mitten crab, from which it diverged  
321 ~183.5 Mya. The unique and/or expanded gene family analysis provides clues to swimming  
322 crab development and environmental adaptation.

323

#### 324 **Availability of supporting data**

325 The raw sequencing data were deposited in the NCBI database under accession number  
326 PRJNA555262. The genome assembly and annotation results are available via the  
327 GigaScience repository GigaDB.

328

#### 329 **Additional files**

330 Table S1: Statistics on genome sequencing data from BGISEQ platform.

331 Table S2: Statistics on sequencing reads from Oxford Nanopore platform.

332 Table S3: Statistics on Hi-C sequencing data.

333 Table S4: Statistics on assembled chromosome-level genome by 3D *de novo* assembly  
334 software.

335 Table S5: Statistics on mapping ratio of the BGISEQ short reads to swimming crab genome.

336 Table S6: Statistics on RNA-seq data.

337 Table S7: Statistics on assembled transcripts by Bridger software.

338 Table S8: Statistics on transcript mapping ratio of swimming crab genome.

339 Table S9: Genome quality comparison of swimming crab with other species.

340 Table S10: Statistics on annotated repetitive sequences using different software.

341 Table S11: KEGG enrichment analysis of unique gene families in swimming crab relative to  
342 six other species.

343 Table S12: Two-cluster analysis of swimming crab and other species.

344 Table S13: KEGG enrichment analysis of expanded gene families in swimming crab.

345 Figure S1: 17-mer analysis of swimming crab genome.

346 Figure S2: GC distribution in species.

347

#### 348 **Abbreviations**

349 Hi-C: High-throughput chromosome conformation capture; BUSCO: Benchmarking  
350 Universal Single-Copy Orthologs; CDS: Coding DNA Sequence; DNA: Deoxyribonucleic  
351 Acid; RNA: Ribonucleic Acid; RNA-seq: RNA sequencing; BLAST: Basic Local Alignment  
352 Search Tool; KEGG: Kyoto Encyclopedia of Genes and Genomes; NCBI: National Center for  
353 Biotechnology Information.

354

### 355 **Conflicts of interest**

356 The authors declare that they have no competing interests.

357

### 358 **Funding**

359 This study was supported by the National Natural Science Foundation of China (31672267,  
360 31640074), Jiangsu Agriculture Science and Technology Innovation Fund (CX(18)3027,  
361 CX(18)2027), Natural Science Foundation of Jiangsu Province (BK20171276, BK20160444),  
362 “Qing Lan Project” of Daizhen Zhang and China Postdoctoral Science Foundation  
363 (2018M642105).

364

### 365 **Author contributions**

366 Y.R., Q.L., Yongxin L., and X.L. conceived the project. B.T., D.Z., S.S., H.Z., Yu L., and S.J.  
367 collected and dissected the samples. H.L., Zhongkai W., K.W., Y.S., Q.Q., C.L., and Yongxin  
368 L. estimated genome size. F.X., Y.C., W.J., and H.J. assembled the genome. B.G., Zhengfei W.,  
369 Z.S., and B.T. performed genome assembly, genome annotation, and evolution analysis. Y.L.,  
370 B.T., Q.Q., and W.W. wrote the manuscript. Y.R. and W.W. revised the manuscript.

371

### 372 **REFERENCES**

373 1. Spiridonov VA, Neretina TV and Schepetov D. Morphological characterization and  
374 molecular phylogeny of *Portunoidea Rafinesque*, 1815 (Crustacea Brachyura):  
375 Implications for understanding evolution of swimming capacity and revision of the  
376 family-level classification. *Zoologischer Anzeiger - A Journal of Comparative*  
377 *Zoology*. 2014;253 5:404-29.



- 378 2. Dai A, Yang S and Song Y. Marine crabs in China Sea. Beijing: Marine Publishing  
379 Company; 1986.
- 380 3. Okamoto K. Malformed regeneration of partly cut swimming leg as a marker for  
381 swimming crab *Portunus trituberculatus*. Fisheries Science. 2010;72 5:1121-3.
- 382 4. Hazlett and A. B. Interspecific Fighting in Three Species of Brachyuran Crabs From  
383 Hawaii1). Crustaceana.
- 384 5. Xue J, Du N, Wei L and Wu H. A review of studies on *Portunus trituberculatus* in  
385 China. Dongahi Marineence. 1997.
- 386 6. Sakai T. Crabs of Japan and the Adjacent Seas. Crabs of Japan & the Adjacent Seas.  
387 1976.
- 388 7. Wu RSS and Shin PKS. Food segregation in three species of portunid crabs.  
389 Hydrobiologia. 1997;362 1-3:107-13.
- 390 8. Qi JB, Gu XL, Ma LB, Qiao ZG and Chen K. The research progress on food  
391 organism culture and technology utilization in crab seed production in ponds in China.  
392 Agricultural Sciences. 2013;4 10:563-9.
- 393 9. Su XR, Li TW, Ding MJ and Chien PK. Evaluation on nutritive value of *Portunus*  
394 *trituberculatus*. Chinese Journal of Oceanology & Limnology. 1997;15 2:168-72.
- 395 10. Wang Z, Sun L, Guan W, Zhou C, Tang B, Cheng Y, et al. *De novo* transcriptome  
396 sequencing and analysis of male and female swimming crab (*Portunus trituberculatus*)  
397 reproductive systems during mating embrace (stage II). BMC Genetics. 2018;19 1:3.
- 398 11. Dan S, Oshiro M, Ashidate M and Hamasaki K. Starvation of Artemia in larval  
399 rearing water affects post-larval survival and morphology of the swimming crab,  
400 *Portunus trituberculatus* (Brachyura, Portunidae). Aquaculture. 2016:  
401 S0044848615300442.
- 402 12. Hamasaki K, Obata Y, Dan S and Kitada S. A review of seed production and stock  
403 enhancement for commercially important portunid crabs in Japan. Aquaculture  
404 International. 2011;19 2:217-35.
- 405 13. Liu S, Sun J and Hurtado LA. Genetic differentiation of *Portunus trituberculatus*, the  
406 world\'s largest crab fishery, among its three main fishing areas. Fisheries Research.

- 407 2013;148 148:38-46.
- 408 14. Lv J, Ping L, Yu W, Baoquan G, Ping C, Jian L, et al. Transcriptome Analysis of  
409 *Portunus trituberculatus* in Response to Salinity Stress Provides Insights into the  
410 Molecular Basis of Osmoregulation. Plos One. 2013;8 12:e82155.
- 411 15. Yang Y, Wang J, Han T, Liu T, Wang C, Xiao J, et al. Ovarian Transcriptome Analysis  
412 of *Portunus trituberculatus* Provides Insights into Genes Expressed during Phase III  
413 and IV Development. Plos One. 2015;10 10:e0138862.
- 414 16. Meng X, Liu P, Jia F, Li J and Gao BQ. Correction: *De novo* Transcriptome Analysis  
415 of *Portunus trituberculatus* Ovary and Testis by RNA-Seq: Identification of Genes  
416 Involved in Gonadal Development. Plos One. 2015;10 7:e0133659.
- 417 17. Servant N, Varoquaux N, Lajoie B, Viara E, Chen CJ, Vert JP, et al. HiC-Pro: an  
418 optimized and flexible pipeline for Hi-C data processing. Genome Biology. 2015;16  
419 1:259.
- 420 18. Ruan J and Li H. Fast and accurate long-read assembly with wtdbg2. 2019.
- 421 19. Talay AC and Altılar DT. RACON: a routing protocol for mobile cognitive radio  
422 networks. In: *Acm Workshop on Cognitive Radio Networks 2009*.
- 423 20. Walker BJ, Abeel T, Shea T, Priest M, Abouelliel A, Sakthikumar S, et al. Pilon: An  
424 Integrated Tool for Comprehensive Microbial Variant Detection and Genome  
425 Assembly Improvement. Plos One. 2014;9 11:e112963.
- 426 21. Dudchenko O, Batra SS, Omer AD, Nyquist SK, Hoeger M, Durand NC, et al. *De*  
427 *nov*o assembly of the *Aedes aegypti* genome using Hi-C yields chromosome-length  
428 scaffolds. Science. 2017;356 6333:92-5.
- 429 22. Simao FA, Waterhouse RM, Ioannidis P, Kriventseva EV and Zdobnov EM. BUSCO:  
430 assessing genome assembly and annotation completeness with single-copy orthologs.  
431 Bioinformatics. 2015;31 19:3210-2.
- 432 23. Li H and Durbin R. Fast and accurate short read alignment with Burrows-Wheeler  
433 transform. Bioinformatics. 2009;25 14:1754-60. doi:10.1093/bioinformatics/btp324.
- 434 24. Kent WJ. BLAT - The BLAST-like alignment tool. Genome Research. 2002;12  
435 4:656-64.

- 436 25. Benson and G. Tandem repeats finder: a program to analyze DNA sequences. *Nucleic*  
437 *Acids Research*. 1999;27 2:573-80.
- 438 26. Bedell JA, Korf I and Gish W. MaskerAid : a performance enhancement to  
439 RepeatMasker. *Bioinformatics*. 2000;16 11:1040.
- 440 27. Chang Z, Li G, Liu J, Zhang Y, Ashby C, Liu D, et al. Bridger: a new framework for  
441 de novo transcriptome assembly using RNA-seq data. *Genome Biology*. 2015;16  
442 1:30.
- 443 28. Stanke M and Waack S. Gene prediction with a hidden Markov model and a new  
444 intron submodel. *Bioinformatics*. 2003;19 suppl\_2:215--25.
- 445 29. Nowell RW, Elsworth B, Oostra V, Zwaan BJ and Blaxter M. A high-coverage draft  
446 genome of the mycalesine butterfly *Bicyclus anynana*. *GigaScience*. 2017;6 7:1-7.
- 447 30. Sadd BM, Barribeau SM, Bloch G, de Graaf DC, Dearden P, Elsik CG, et al. The  
448 genomes of two key bumblebee species with primitive eusocial organization. *Genome*  
449 *Biology*. 2015;16 1:76. doi:10.1186/s13059-015-0623-3.
- 450 31. Adams MD, Celniker SE, Holt RA, Evans CA, Gocayne JD, Amanatides PG, et al.  
451 The Genome Sequence of *Drosophila melanogaster*. *Science*. 2000;287 5461:2185.
- 452 32. Waterston RH, Lindblad-Toh K, Birney E, Rogers J, Abril JF, Agarwal P, et al. Initial  
453 sequencing and comparative analysis of the mouse genome. *Nature*. 2002;420  
454 6915:520-62. doi:10.1038/nature01262.
- 455 33. Ma J and Shi YB. The *Mesobuthus martensii* genome reveals the molecular diversity  
456 of scorpion toxins. *Cell & bioscience*. 2014;4 1:1. doi:10.1186/2045-3701-4-1.
- 457 34. Linsheng S, Chao B, Yongju L, Lingling W, Xinxin Y, Jia L, et al. Draft genome of  
458 the Chinese mitten crab, *Eriocheir sinensis*. *GigaScience*. 2016;5 1:5.
- 459 35. Liu R. Introduction to the classification of recent crustacean. In: *Transactions of the*  
460 *Chinese crustacean society* No. 4. The Chinese crustacean Society, Science Press,  
461 Beijing. 2003;No. 4:76-86.
- 462 36. Tang B, Zhou K, Song D, Yang G and Dai A. Molecular systematics of the Asian  
463 mitten crabs, genus *Eriocheir* (Crustacea: Brachyura). *Molecular Phylogenetics &*  
464 *Evolution*. 2003;29 2:309-16.

- 465 37. Song D. X., S. L. Yang. The Crustacea fauna of Hebei. Hebei Science and  
466 Technology Publishing House, Shijiazhuang. 2009:1-772.
- 467 38. Tang BP, Xin ZZ, Liu Y, Zhang DZ, Wang ZF, Zhang HB, et al. The complete  
468 mitochondrial genome of *Sesarmops sinensis* reveals gene rearrangements and  
469 phylogenetic relationships in Brachyura. 2017;12 6:e0179800.  
470 doi:10.1371/journal.pone.0179800.
- 471 39. Xuan F WX, Liu N, et al. Reproductive potential of individual male Chinese mitten  
472 crabs *Eriocheir japonica sinensis* in a local pond- reared broodstock: Implications for  
473 parent crab selection and sex ratio optimization. Aquac Res. 2018;49:3498–507.
- 474 40. Gong L, Fan G, Ren Y, Chen Y, Qiu Q, Liu L, et al. Chromosomal level reference  
475 genome of *Tachypleus tridentatus* provides insights into evolution and adaptation of  
476 horseshoe crabs. 2019;19 3:744-56. doi:10.1111/1755-0998.12988.
- 477 41. Birney E and Durbin R. Using GeneWise in the Drosophila Annotation Experiment.  
478 Genome Research. 2000;10 4:547-8.
- 479 42. Haas BJ, Salzberg SL, Zhu W and Pertea... M. Automated eukaryotic gene structure  
480 annotation using EVIDENCEModeler and the Program to Assemble Spliced Alignments.  
481 Genome Biology. 2008;9 1:R7.
- 482 43. Zdobnov EM and Apweiler R. InterProScan - an integration platform for the  
483 signature-recognition methods in InterPro. Bioinformatics. 2001;17 9:847-8.
- 484 44. Altschul SF. Basic local alignment search tool (BLAST). Journal of Molecular  
485 Biology. 2012;215 3:403-10.
- 486 45. Li and L. OrthoMCL: Identification of Ortholog Groups for Eukaryotic Genomes.  
487 Genome Research. 2003;13 9:2178-89.
- 488 46. Stamatakis and A. RAxML version 8: a tool for phylogenetic analysis and  
489 post-analysis of large phylogenies. Bioinformatics. 2014;30 9:1312-3.
- 490 47. Yang and Ziheng. PAML: a program package for phylogenetic analysis by maximum  
491 likelihood. Computer Applications in the Biosciences Cabios. 1997;13 5:555.
- 492 48. None. Phylogenetic test of the molecular clock and linearized trees. Molecular  
493 Biology & Evolution. 1995;12 5:823-33.

- 494 49. De Bie T, Cristianini N, Demuth JP and Hahn MW. CAFE: a computational tool for  
495 the study of gene family evolution. *Bioinformatics*. 2006;22 10:1269-71.
- 496 50. Beissbarth T and Speed TP. GOstat: find statistically overrepresented Gene  
497 Ontologies within a group of genes. *Bioinformatics*. 2004;20 9:1464-5.
- 498 51. Huang DW, Sherman BT and Lempicki RA. Bioinformatics enrichment tools: paths  
499 toward the comprehensive functional analysis of large gene lists. *Nucleic Acids*  
500 *Research*. 2009;37 1:1.

501

502

503

504

505

506

507

508

509

510

511

512

513

514

515

516

517

518

519

520

521

522

523 **Table 1: Assembly of swimming crab genome.**

| Term                | Contig phase  |        | Hi-C phase    |        |
|---------------------|---------------|--------|---------------|--------|
|                     | Size (bp)     | Number | Size (bp)     | Number |
| N90                 | 439,683       | 334    | 11,273,125    | 41     |
| N80                 | 1,225,551     | 203    | 14,151,211    | 33     |
| N70                 | 2,035,154     | 141    | 16,942,622    | 27     |
| N60                 | 2,950,146     | 100    | 19,786,189    | 21     |
| N50                 | 4,121,416     | 71     | 21,793,880    | 17     |
| Max length          | 17,984,318    | -      | 42,710,960    | -      |
| Total length        | 1,004,084,521 | -      | 1,005,046,021 | -      |
| Number $\geq$ 100bp | -             | 2446   | -             | 523    |
| Number $\geq$ 10kb  | -             | 1756   | -             | 314    |

524 Note: Contig phase represents results assembled by WTDBG software, and Hi-C phase  
525 represents scaffold statistics of genome after chromosome assembly.

526

527 **Table 2: Quality evaluation of assembled swimming crab genome by BUSCO.**

| Library                            | Eukaryota | Metazoa |
|------------------------------------|-----------|---------|
| Complete BUSCO (C)                 | 287       | 909     |
| Complete and single-copy BUSCO (S) | 283       | 903     |
| Complete and duplicated BUSCO (D)  | 4         | 6       |
| Fragmented BUSCO (F)               | 2         | 19      |
| Missing BUSCO (M)                  | 14        | 50      |
| Total BUSCO groups searched        | 303       | 978     |
| Summary                            | 94.7%     | 92.9%   |

528

529 **Table 3: Statistics on transposable elements (TEs) in swimming crab genome.**

| Type    | RebaseTEs   |             | TE proteins |             | <i>De novo</i> |             | Combined TEs |             |
|---------|-------------|-------------|-------------|-------------|----------------|-------------|--------------|-------------|
|         | Length (bp) | % in genome | Length (bp) | % in genome | Length (bp)    | % in genome | Length (bp)  | % in genome |
| DNA     | 131,799,733 | 13.11%      | 2,434,533   | 0.24%       | 19,288,080     | 1.92%       | 149,711,951  | 14.90%      |
| LINE    | 16,171,649  | 1.61%       | 75,759,827  | 7.54%       | 131,530,457    | 13.09%      | 153,027,744  | 15.23%      |
| SINE    | 142,878     | 0.01%       | 0           | 0           | 0              | 0           | 142,878      | 0.014%      |
| LTR     | 26,546,055  | 2.64%       | 10,195,324  | 1.01%       | 18,421,957     | 1.83%       | 45,189,365   | 4.50%       |
| Other   | 89,969,319  | 8.95%       | 0           | 0           | 211,157,523    | 21.01%      | 230,116,216  | 22.90%      |
| Unknown | 34,752      | 0.0035%     | 0           | 0           | 90,989,908     | 9.05%       | 91,007,921   | 9.06%       |
| Total   | 213,558,503 | 21.25%      | 88,375,336  | 8.79%       | 464,908,824    | 46.26%      | 525,492,271  | 52.29%      |

530

531 **Table 4: Functional annotation of predicted protein-coding genes.**

| Term      | Gene number | Percentage (%) |
|-----------|-------------|----------------|
| GO        | 8,712       | 51.87          |
| InterPro  | 11,691      | 69.61          |
| KEGG      | 10,880      | 64.78          |
| SwissProt | 12,558      | 74.77          |

|             |        |       |
|-------------|--------|-------|
| TrEMBL      | 12,256 | 72.97 |
| Annotated   | 16,053 | 95.58 |
| Unannotated | 743    | 4.42  |
| Total       | 16,796 | 100   |

532

533 **Figure 1: Swimming crab, *Portunus trituberculatus*.**

534

535 **Figure 2: Genome characteristics of swimming crab.**

536

537 **Figure 3: Annotation quality comparison of protein-coding genes.**

538

539 **Figure 4: Gene family analysis of swimming crab.** A. Orthologous genes among species. B:

540 Unique and common gene families among species.

541

542 **Figure 5: Phylogenetic relationships, divergence time, and evolution rate analysis.** A.

543 Phylogenetic relationship and divergence time of species. Red dot represents fossil record

544 used here. B. Relative evolution rate of species.

545

546

547

548

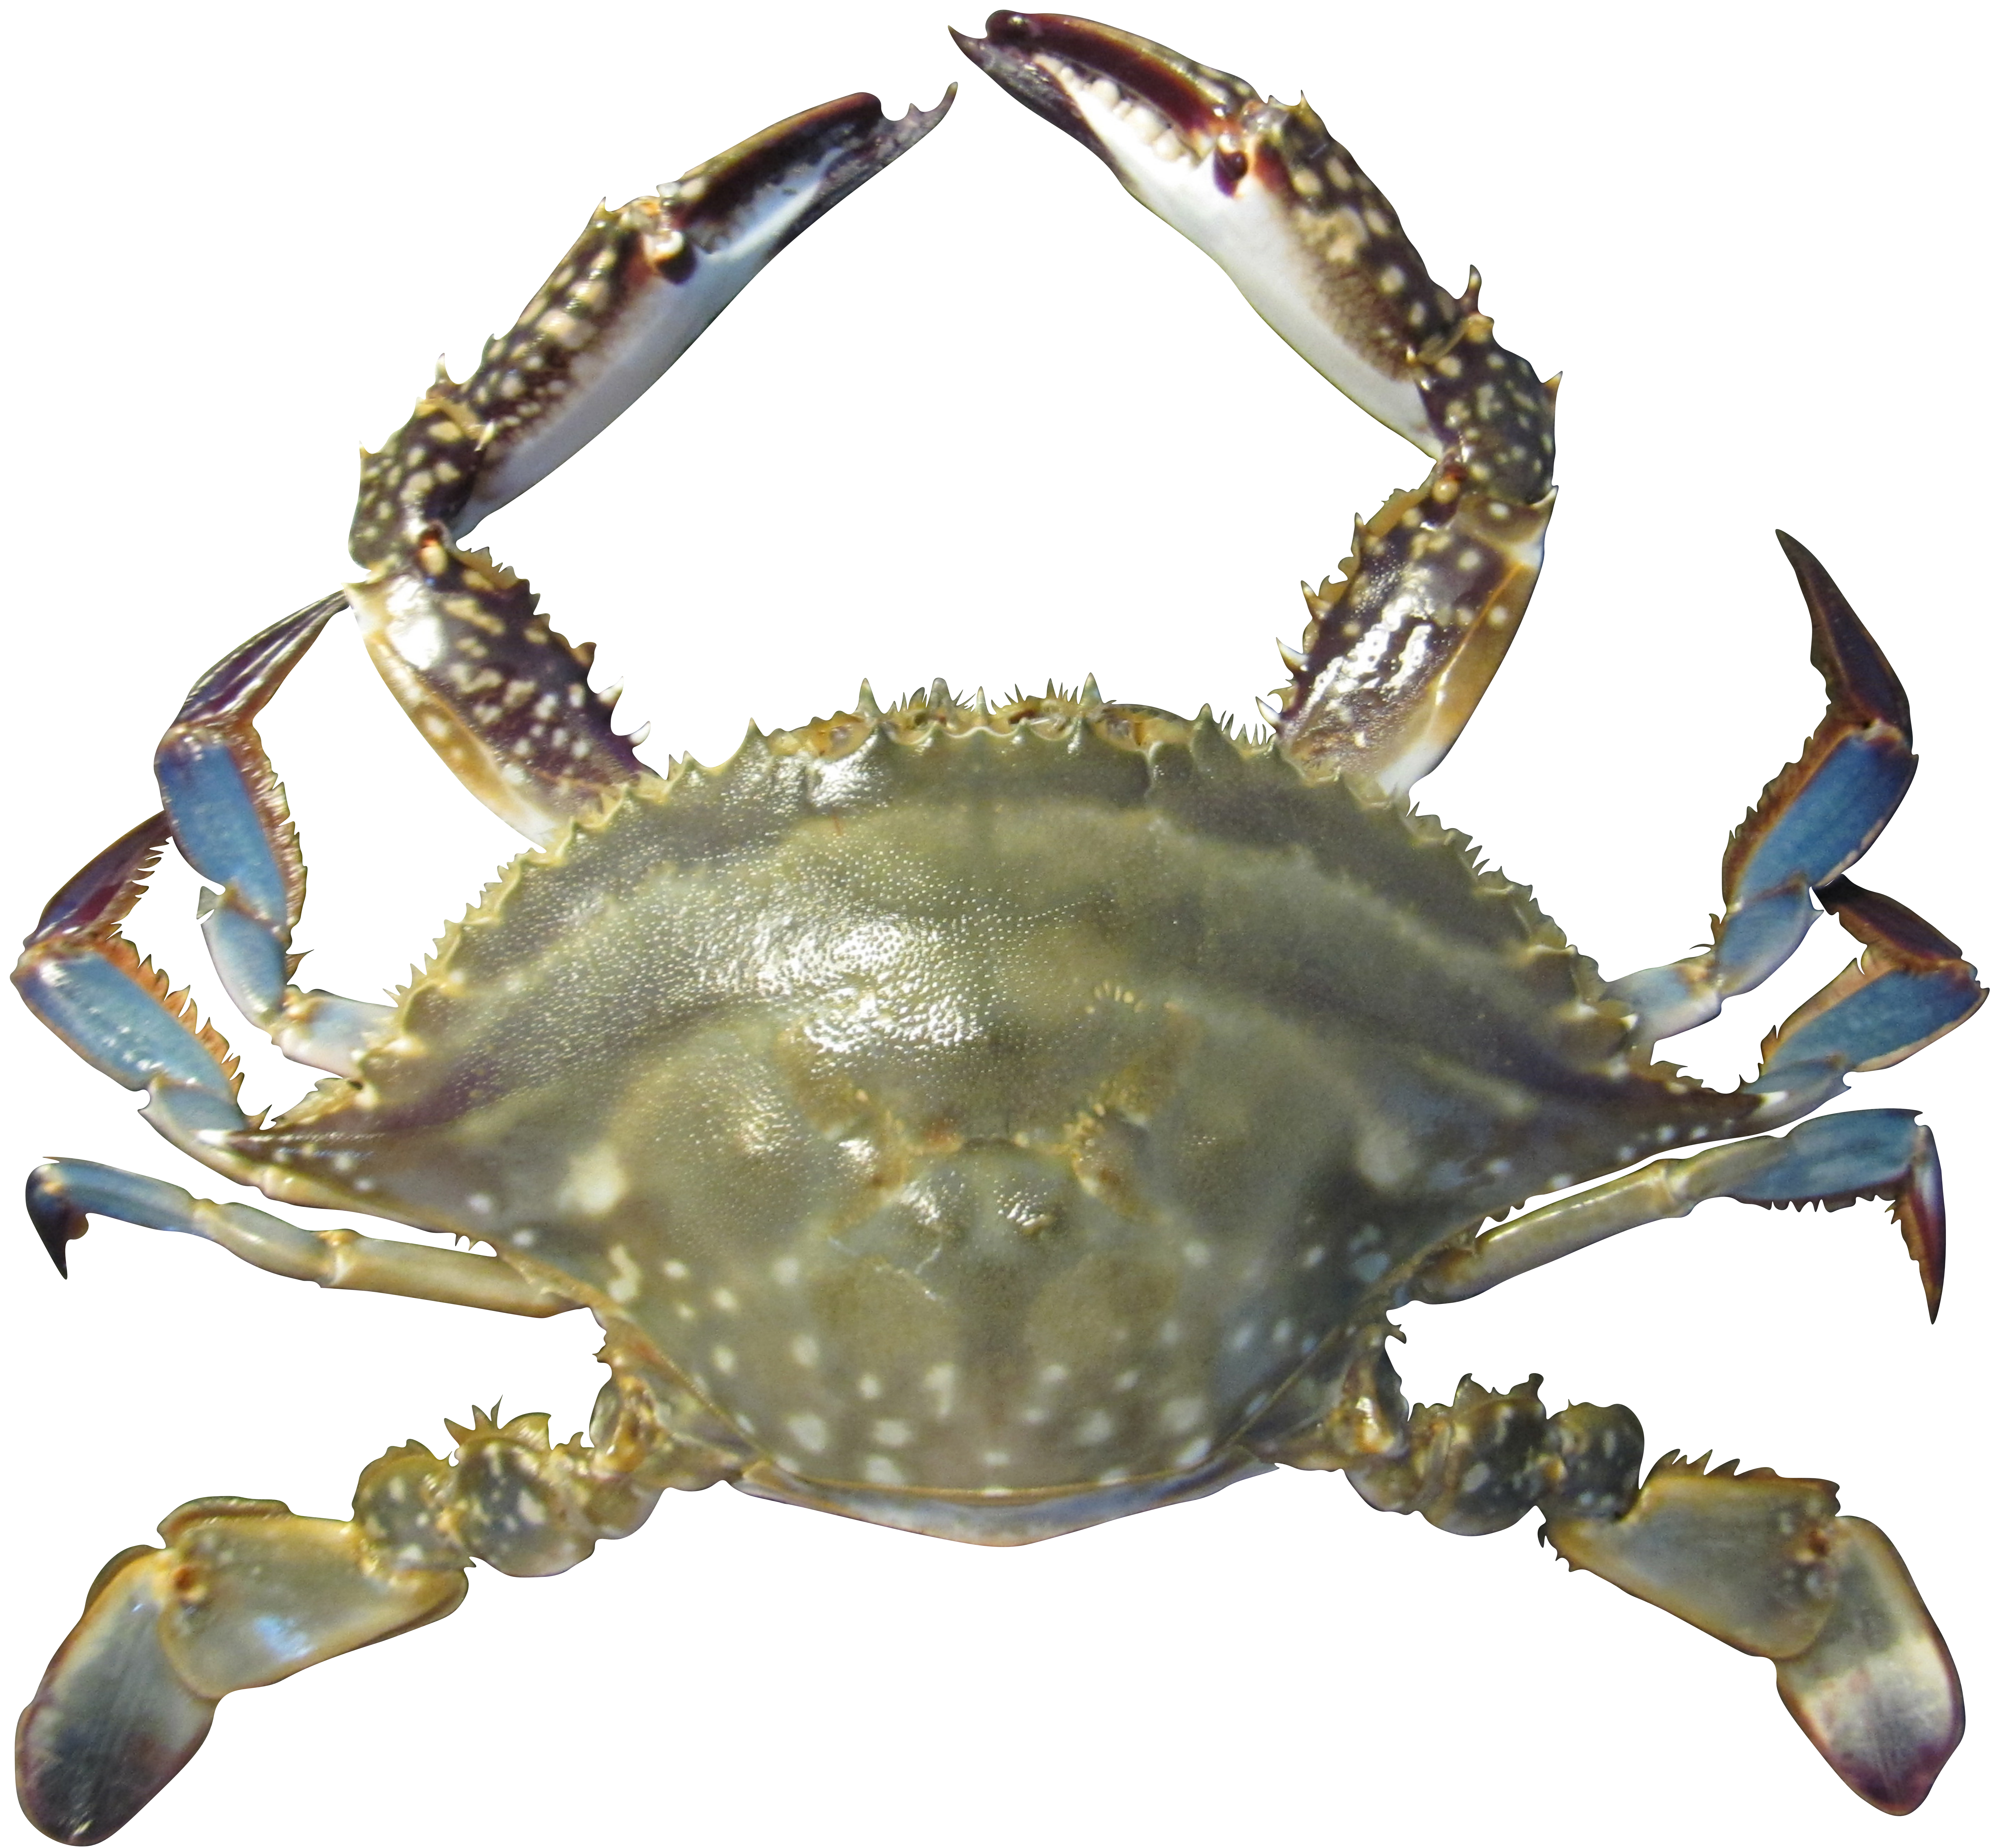



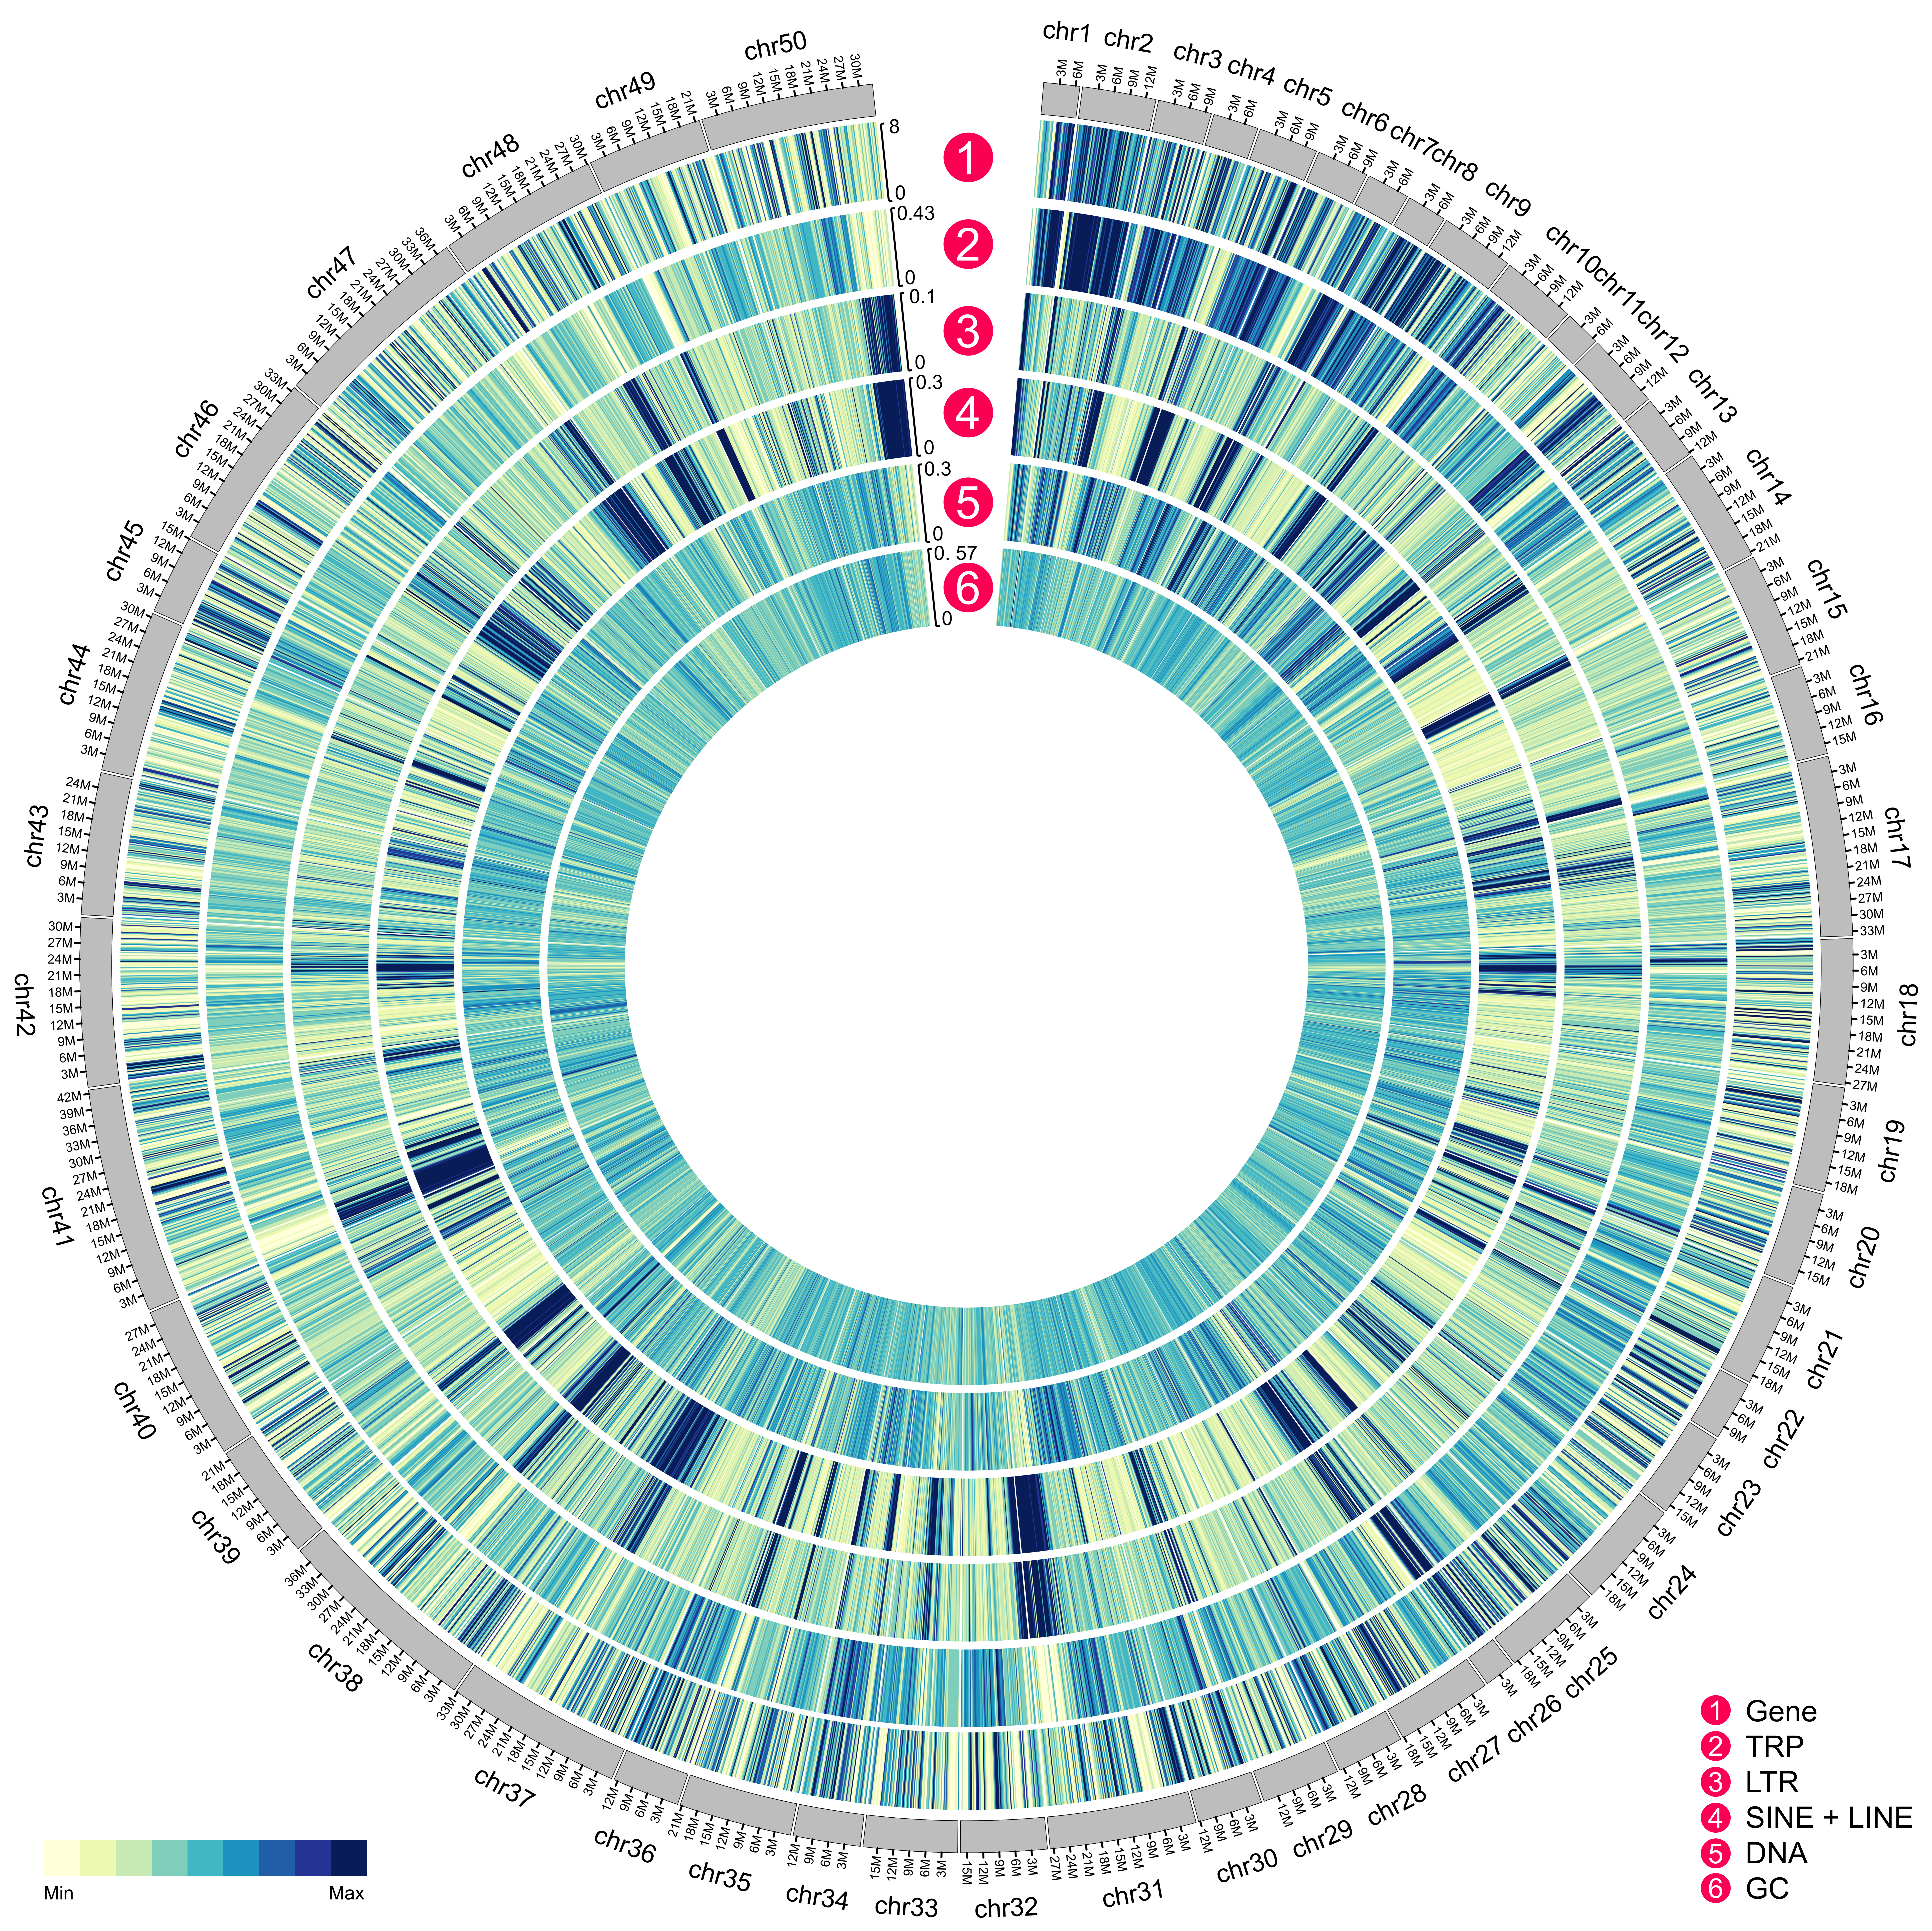

Figure 3

[Click here to download Figure 3.pdf](#)

### Distribution of mRNA length

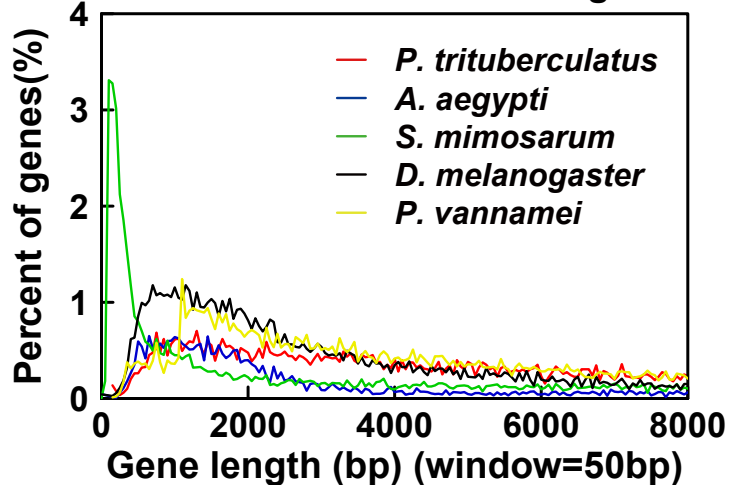

### Distribution of CDS length

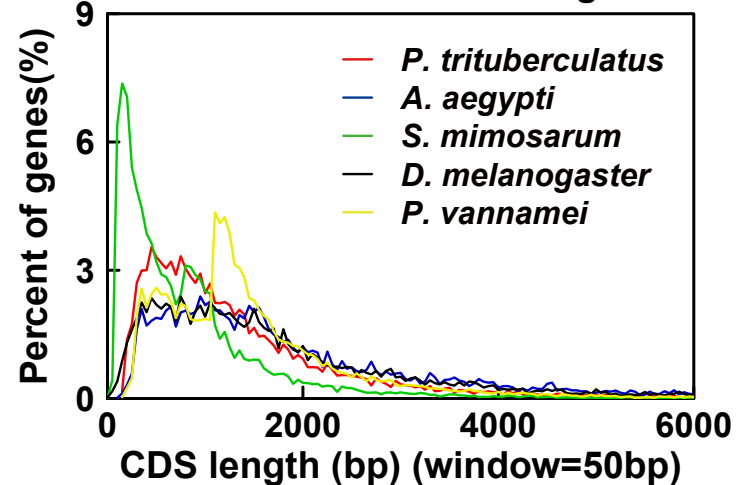

### Distribution of exon length

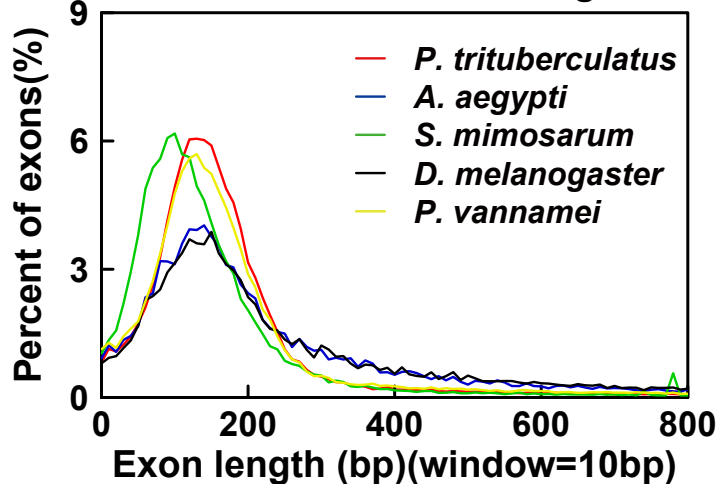

### Distribution of intron length

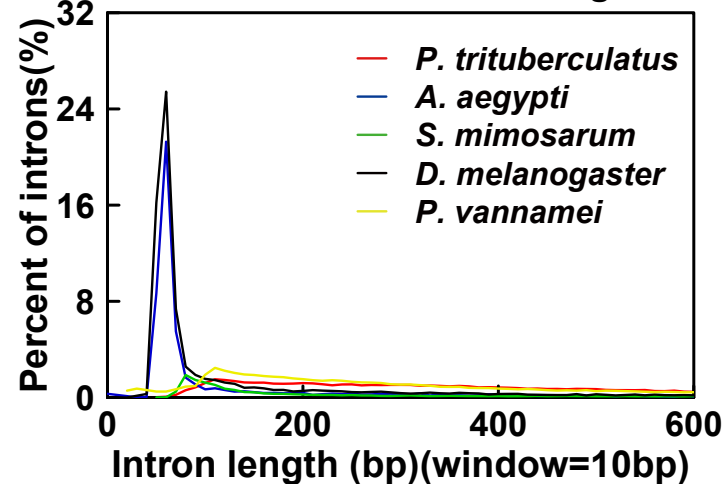

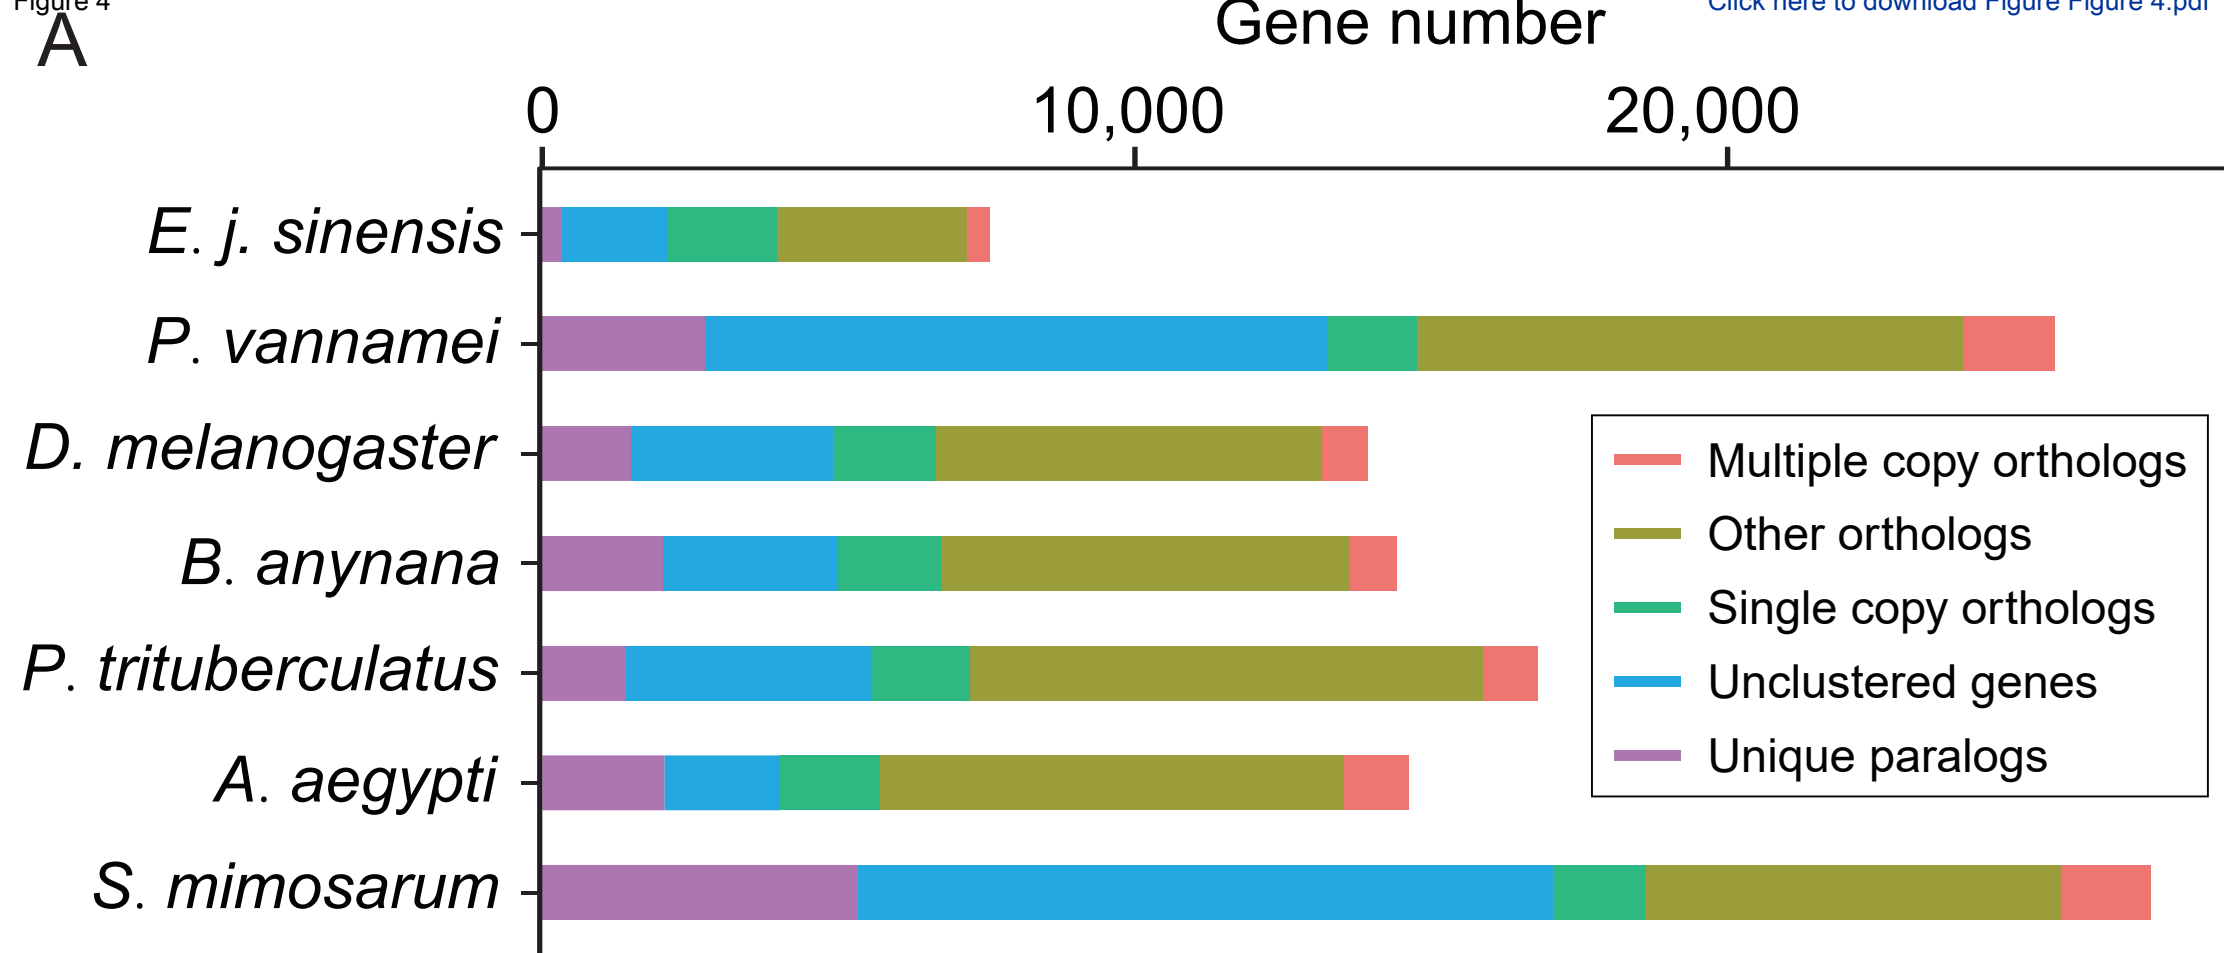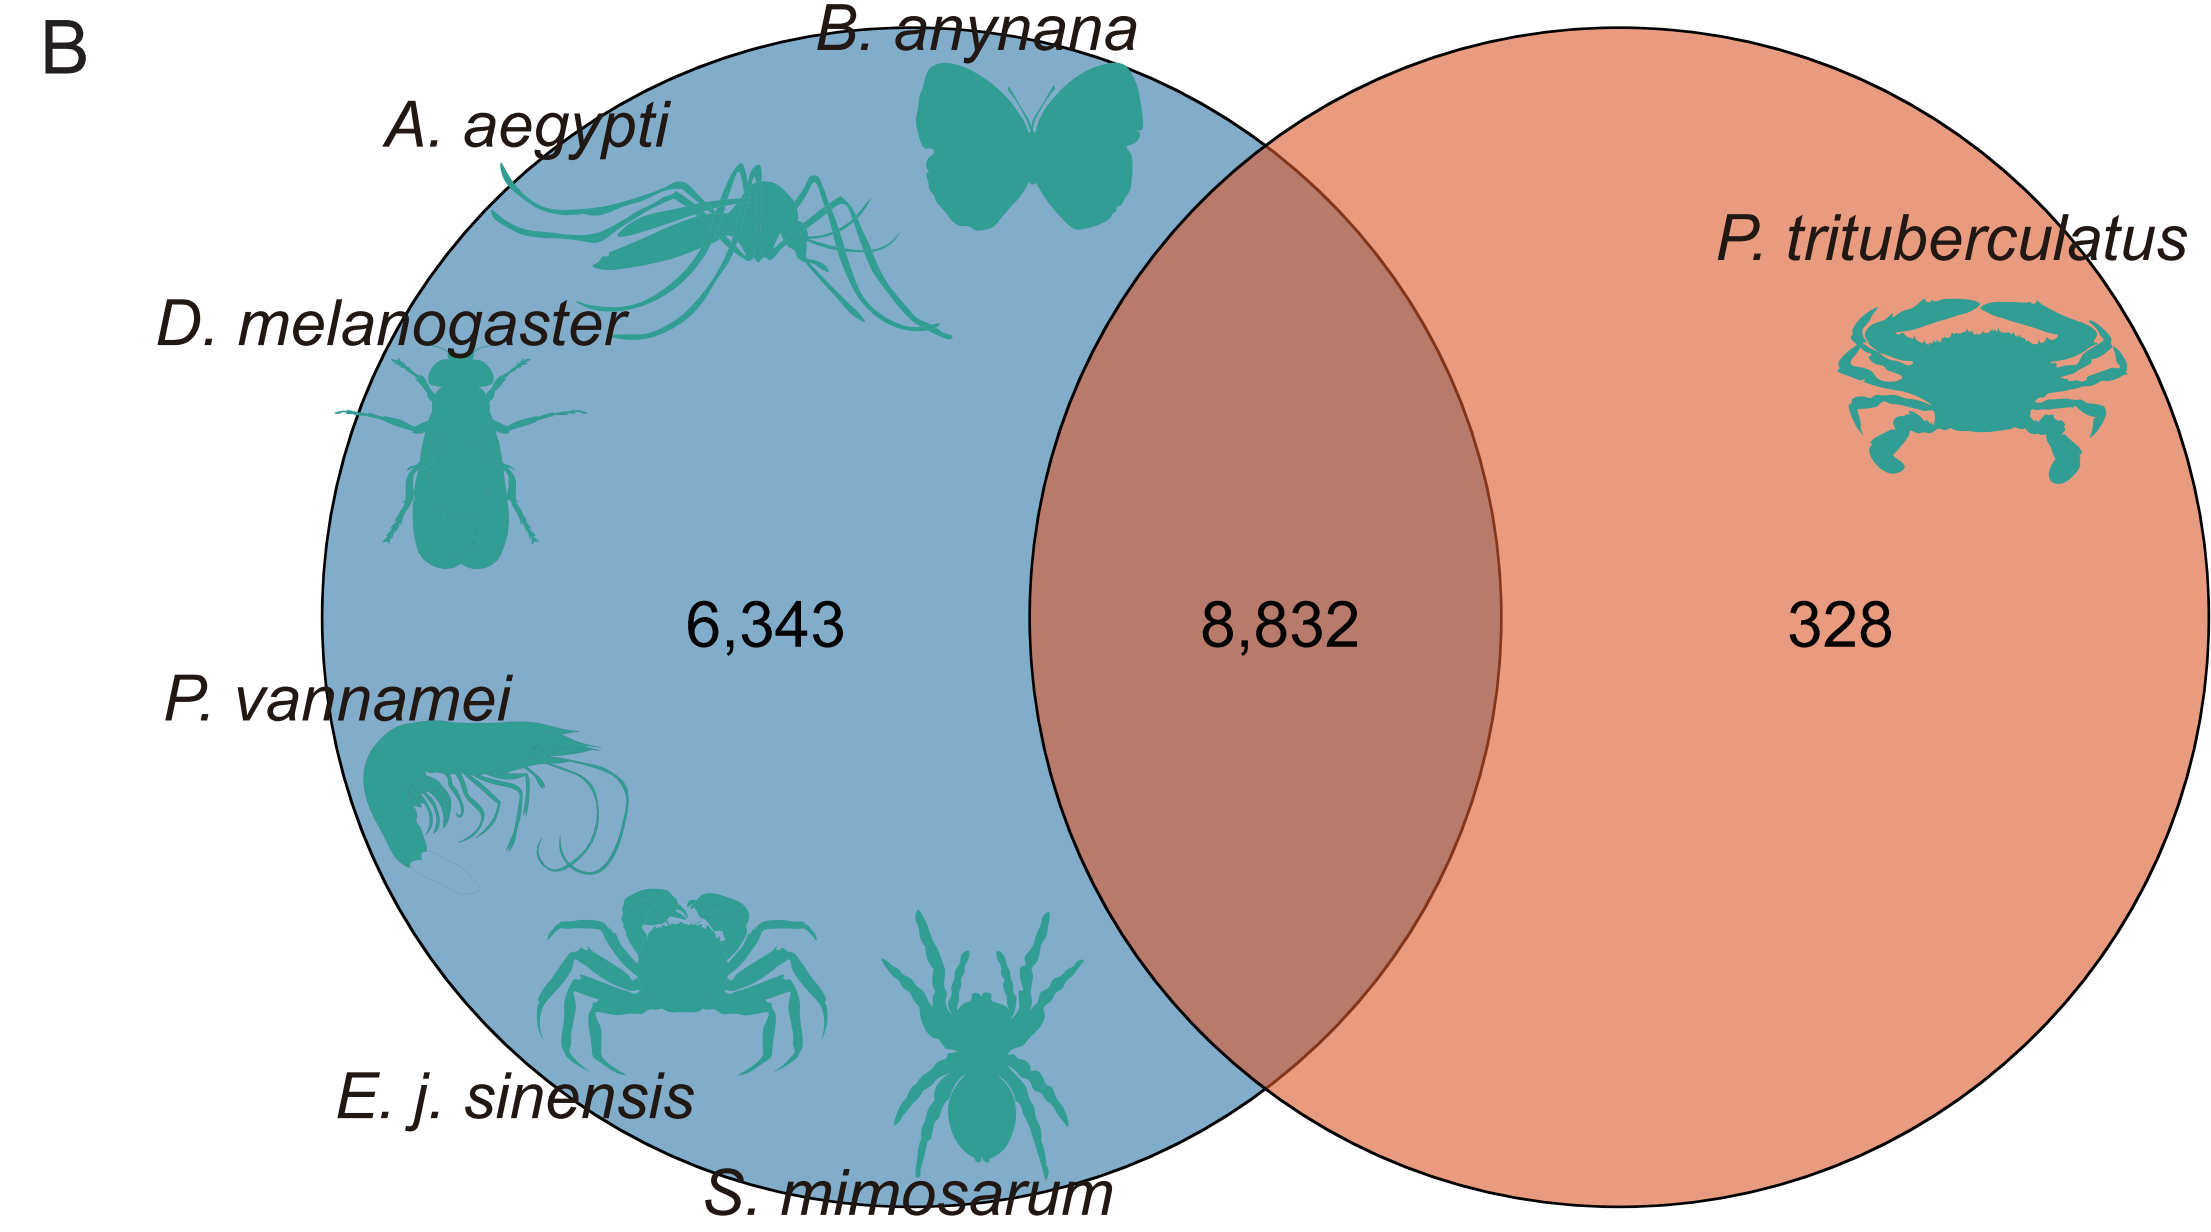

Figure 5

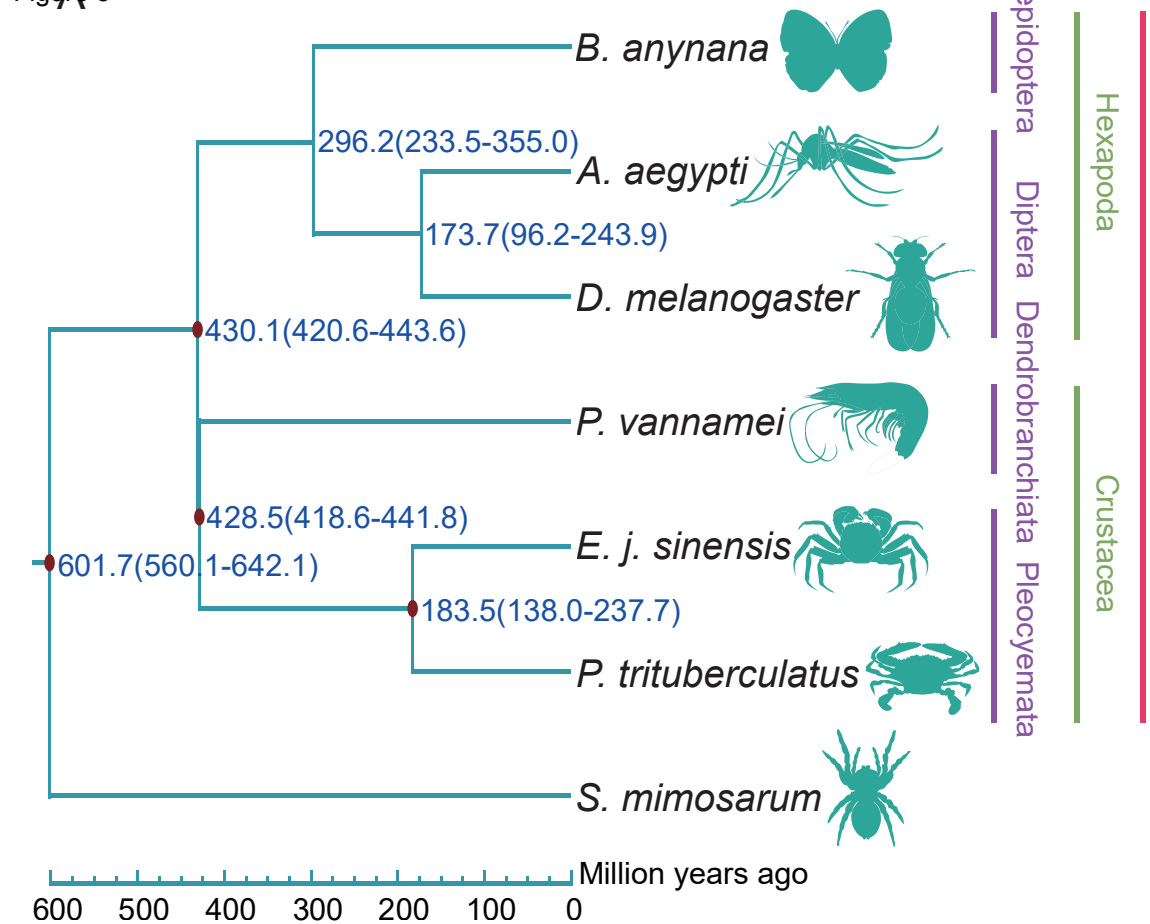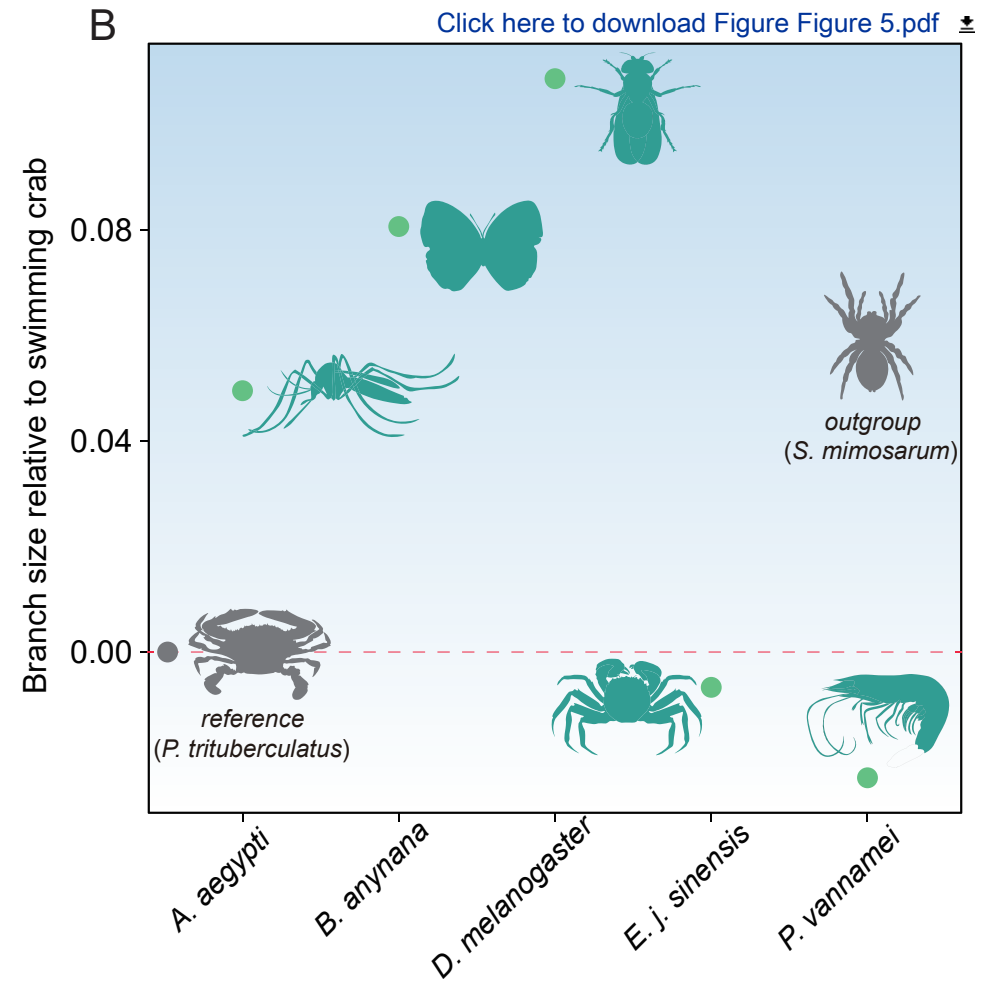

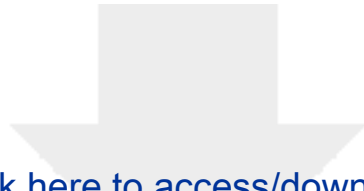

Click here to access/download  
**Supplementary Material**  
Supplementary tables and figures.docx

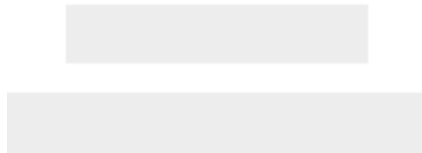

Dear Editors,

We would like to submit the enclosed manuscript, entitled “**Chromosome-level genome assembly reveals adaptive evolution of the swimming crab (*Portunus trituberculatus*)**” for your consideration of publication as an original research paper in “*GigaScience*”.

The swimming crab, *Portunus trituberculatus*, is an important commercial species in China and is widely distributed in the coastal waters of Asia-Pacific countries. Swimming crabs are considered highly nutritious, especially in regard to crab cream, and are very popular in China. As a result, the crab has been heavily overfished, resulting in substantial declines in its natural population and initiation of artificial breeding. With continued research on the crab, it has become clear that morphological, physiological, but the genetic changes are poorly understood. At present, genomic research on the swimming crab has only been conducted at the transcriptome level, with the whole genome not yet described.

In this study, based on BGISEQ short reads, Nanopore, and Hi-C sequencing data, we assembled the first chromosome-level high-quality genome of the swimming crab. Evaluation results indicated that the genome quality of swimming crab was comparable with that of most high-quality genomes in other species. We also successfully obtained 16,791 high-quality protein-coding genes by integrating three different methods. The genome and annotation data will help researchers better understand the evolution of crabs and improve their economic value. The phylogenetic results indicated that the swimming crab is closely related to the Chinese mitten crab, from which it diverged ~183.5 Mya. The unique and/or expanded gene family analysis provides clues to swimming crab development and environmental adaptation.

We believe these findings will be of interest to a broad audience of evolutionary and developmental biologists, as well as to researchers working to understand the molecular basis of the development in the swimming crab. In addition, these genomic resources could help scientists studying the development and ecological adaptation of the swimming crab. As a premier international journal devoted to the rapid dissemination of significant biological findings, *GigaScience* represents the ideal platform for sharing these results with the international research community.

We thank you for your consideration of our manuscript and look forward to hearing from you at your earliest convenience.

Yours sincerely,

Yandong Ren, Ph.D

Center for Ecological and Environmental Sciences, Northwestern Polytechnical University,

Xi'an 710072, China

Email: [renyandong90@126.com](mailto:renyandong90@126.com)
